# Supplementary material for: Palladium-catalyzed thiocarbonylation of alkenes toward branched thioesters using CO2
Source: Royal Society of Chemistry journal article supplement (doi:10.1039/d3qo01940c), 2024-01-01

## Supporting Information

# Palladium-Catalyzed Thiocarbonylation of Alkenes toward Branched Thioesters using CO<sub>2</sub>

Huan Wang,<sup>†</sup> Chen Li,<sup>†</sup> Yudong Li,<sup>†</sup> Jianbin Chen,<sup>¶</sup> Shaoli Liu<sup>‡</sup> and Yuehui Li<sup>†,\*</sup>

<sup>†</sup>Lanzhou Institute of Chemical Physics (LICP), Chinese Academy of Sciences, Lanzhou, 730000, P. R. China.

<sup>‡</sup>College of Chemistry and Chemical Engineering, Yantai, University, Yantai, 264005, P. R. China.

<sup>¶</sup>School of Chemistry and Chemical Engineering, Qilu University of Technology (Shandong Academy of Sciences), Jinan, 2503535, P. R. China.

[yhli@licp.cas.cn](mailto:yhli@licp.cas.cn)

### CONTENTS

|                                                                                    |     |
|------------------------------------------------------------------------------------|-----|
| 1. General information .....                                                       | S2  |
| 2. Ligand synthesis .....                                                          | S2  |
| 3. Typical procedure for thiocarbonylation of styrenes using CO <sub>2</sub> ..... | S4  |
| 3.1 Screening of reaction conditions .....                                         | S4  |
| 4. Deuterium-labelling experiments .....                                           | S6  |
| 5. Mechanism verification experiments .....                                        | S15 |
| 5.1 Mechanism of free radical elimination .....                                    | S15 |
| 5.2 Verification of palladium hydrogen species .....                               | S15 |
| 5.3 Reduction of CO <sub>2</sub> with phenylsilane .....                           | S16 |
| 5.4 Carboxylic acid species capture experiment .....                               | S18 |
| 5.5 CO <sub>2</sub> and <sup>13</sup> CO competition experiments .....             | S20 |
| 5.6 Details of DFT calculations .....                                              | S22 |
| 6. Competition reactions .....                                                     | S27 |
| 7. Procedures for gram-scale experiment .....                                      | S28 |
| 8. General procedure for the preparation of Estrone Derivatives .....              | S29 |
| 9. General procedure for the preparation of naproxen .....                         | S29 |
| 10. Asymmetric thiocarbonylation reaction .....                                    | S30 |
| 11. Characterization spectra data of compounds .....                               | S31 |
| 12. References .....                                                               | S40 |
| 13. NMR spectra .....                                                              | S40 |
| 14. Chiral HPLC chromatogram .....                                                 | S87 |

## 1. General information

All of the reagents except for the ligand **L1** and **L2** were purchased commercially and were used as received. Unless otherwise noted, all experiments were conducted under a nitrogen atmosphere. All chemicals were purchased from Adamas, Aldrich, TCI, Alfa etc. Unless otherwise noted, all commercial reagents were used without further purification. And the NMR spectroscopy was in full accordance with the data in the literature. The products of thiocarbonylation were characterized by  $^1\text{H}$  NMR,  $^{13}\text{C}$  NMR,  $^{19}\text{F}$  NMR, GC, HRMS spectroscopy. NMR spectra were measured using a Bruker NMR (400 MHz).  $\text{CDCl}_3$ ,  $\text{C}_6\text{D}_6$  or  $\text{DMSO}-d_6$  was used as the solvent and chemical shifts are reported in ppm relative to solvent: reference to  $\text{CDCl}_3$ : 7.26 ppm ( $^1\text{H}$  NMR) and 77.00 ppm ( $^{13}\text{C}$  NMR), to  $\text{C}_6\text{D}_6$ : 7.16 ppm ( $^1\text{H}$  NMR) and 128.00 ppm ( $^{13}\text{C}$  NMR) and to  $\text{DMSO}-d_6$ : 2.50 ppm ( $^1\text{H}$  NMR) and 39.50 ppm ( $^{13}\text{C}$  NMR). The coupling constant between fluorine and carbon is not discussed due to the complexity. Gas chromatographic analyses were performed on SHIMADZU GC-2010 Plus spectrometer. GC-MS was obtained using electron ionization (SHIMADZU GCMS-QP2010SE). ESI (electrospray ionization) high resolution mass spectra were recorded on an Agilent Technologies 6530 Q-TOF LC/MS spectrometer. High performance liquid chromatography (HPLC) was performed on Shimadzu LC-20AT instruments using Daicel Chiralcel OJH column.

## 2. Ligand synthesis

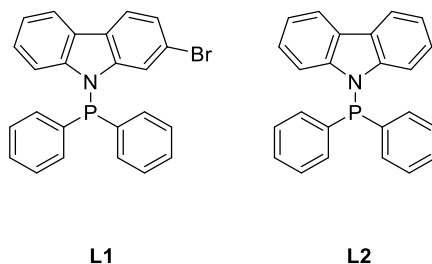

Ligand **L1** and **L2** were synthesized by following a literature procedure.<sup>1</sup> Other ligands (**L3-L11**) were purchased from commercial sources and used without further purification.

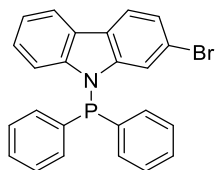

### 2-bromo-9-(diphenylphosphanyl)-9H-carbazole (**L1**)

White solid (Yield = 85%; 3.65 g);  $^1\text{H}$  NMR (400 MHz,  $\text{CDCl}_3$ ):  $\delta$  = 7.91 (m, 1H), 7.80 (d,  $J$  = 8.0 Hz, 1H), 7.68 (s, 1H), 7.61 (m, 1H), 7.32 (m, 4H), 7.28 - 7.23 (m, 7H), 7.16 - 7.12 (m, 2H).  $^{13}\text{C}$  NMR (100 MHz,  $\text{CDCl}_3$ ):  $\delta$  = 133.9, 133.8, 131.4, 131.2, 129.5, 128.8, 128.8, 126.0, 124.0, 121.1, 121.1, 120.1, 116.7, 116.5, 114.1, 114.0.  $^{31}\text{P}$  NMR (162 MHz,  $\text{CDCl}_3$ ):  $\delta$  = 33.68. HRMS (ESI) [ $\text{C}_{24}\text{H}_{17}\text{BrNP}+\text{H}$ ] $^+$ : calculated mass 430.0355, measured mass 430.0360.

### Single-Crystal Structure Analysis

Single crystal of ligand **L1** was obtained by recrystallization in dichloromethane and n-hexane. CCDC: 2100007 contains the supplementary crystallographic data which can be obtained free of charge from the Cambridge Crystallography Data Center via [www.ccdc.cam.ac.uk/data\\_request/cif](http://www.ccdc.cam.ac.uk/data_request/cif).

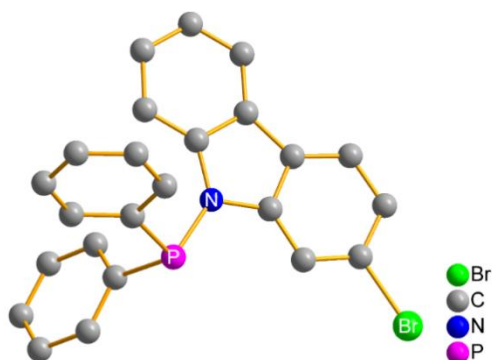

**Figure S1.** Thermal Ellipsoid Depiction of Compound **L1**

**Table S1.** Crystal data and structure refinement for compound **L1**

|                                                |                                                               |
|------------------------------------------------|---------------------------------------------------------------|
| Empirical formula                              | C <sub>24</sub> H <sub>17</sub> BrNP                          |
| Formula weigh                                  | 430.26                                                        |
| Crystal system                                 | monoclinic                                                    |
| Space group                                    | P 21                                                          |
| a (Å)                                          | 10.659(2)                                                     |
| b (Å)                                          | 8.1881(16)                                                    |
| c (Å)                                          | 11.525(2)                                                     |
| α (°)                                          | 90.000                                                        |
| β (°)                                          | 101.380(3)                                                    |
| γ (°)                                          | 90.000                                                        |
| V (Å <sup>3</sup> )                            | 986.1(3)                                                      |
| Z                                              | 2                                                             |
| Temperature/K                                  | 296(2)                                                        |
| F (000)                                        | 436                                                           |
| Crystal size/mm <sup>3</sup>                   | 0.30 × 0.30 × 0.20                                            |
| θ min, θ max (deg)                             | 1.802, 24.992                                                 |
| Reflections collected                          | 4998                                                          |
| Independent reflections                        | 3353 (R <sub>int</sub> = 0.0214, R <sub>sigma</sub> = 0.0823) |
| Data/restraints/parameters                     | 3353/1/244                                                    |
| Goodness-of-fit on F <sup>2</sup>              | 0.974                                                         |
| Final R indexes [I >= 2σ (I)]                  | R <sub>1</sub> = 0.0366, wR <sub>2</sub> = 0.0896             |
| Final R indexes [all data]                     | R <sub>1</sub> = 0.0502, wR <sub>2</sub> = 0.0980             |
| Largest diff. peak and hole/ e Å <sup>-3</sup> | 0.415/-0.262                                                  |

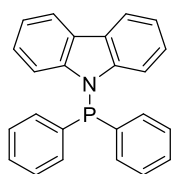

**9-(diphenylphosphanyl)-9H-carbazole (L2)<sup>2</sup>**

Yellow liquid (Yield = 80%; 2.80 g);  $^1\text{H}$  NMR (400 MHz,  $\text{CDCl}_3$ ):  $\delta$  = 8.13 - 8.02 (m, 2H), 7.73 (m, 2H), 7.52 (d,  $J$  = 4.0 Hz, 2H), 7.45 (m, 4H), 7.34 (t,  $J$  = 4.0 Hz, 5H), 7.26 (m, 3H).  $^{13}\text{C}$  NMR (100 MHz,  $\text{CDCl}_3$ ):  $\delta$  = 143.7, 134.3, 131.2, 129.2, 128.6, 125.6, 120.7, 120.1, 113.8, 113.7.  $^{31}\text{P}$  NMR (162 MHz,  $\text{CDCl}_3$ ):  $\delta$  = 31.87.

### 3. Typical procedure for thiocarbonylation of styrenes using $\text{CO}_2$

To a 4 mL sealing tube in a nitrogen-filled glovebox, the alkene (0.2 mmol), thiol (1.7 equiv, 0.34 mmol), palladium-catalyst (5.0 mmol%, 0.01 mmol), ligand (10.0 mmol%, 0.02 mmol),  $\text{PhSiH}_3$  (1.8 equiv, 0.36 mmol),  $\text{ZnI}_2$  (20.0 mmol%, 0.04 mmol)/DABCO (20.0 mmol%, 0.04 mmol) were added followed by addition of solvent *N*-methylpyrrolidone (NMP) (0.5 mL). Then the tube was sealed, taken out of the glovebox and placed into the autoclave. The autoclave was sealed and purged three times with  $\text{CO}_2$  gas, then pressurized to 20 atm. Finally, the autoclave was heated at 80 °C for 18 h with stirring. After the reaction finished, the autoclave was cooled to room temperature and the pressure was carefully released. The result was measured by GC and GC-MS analysis using dodecane as internal standard or the product was purified by silica gel giving the isolated yield.

#### 3.1 Screening of reaction conditions

**Scheme S1.** Ligand screening for the thiocarbonylation of styrene<sup>a</sup>

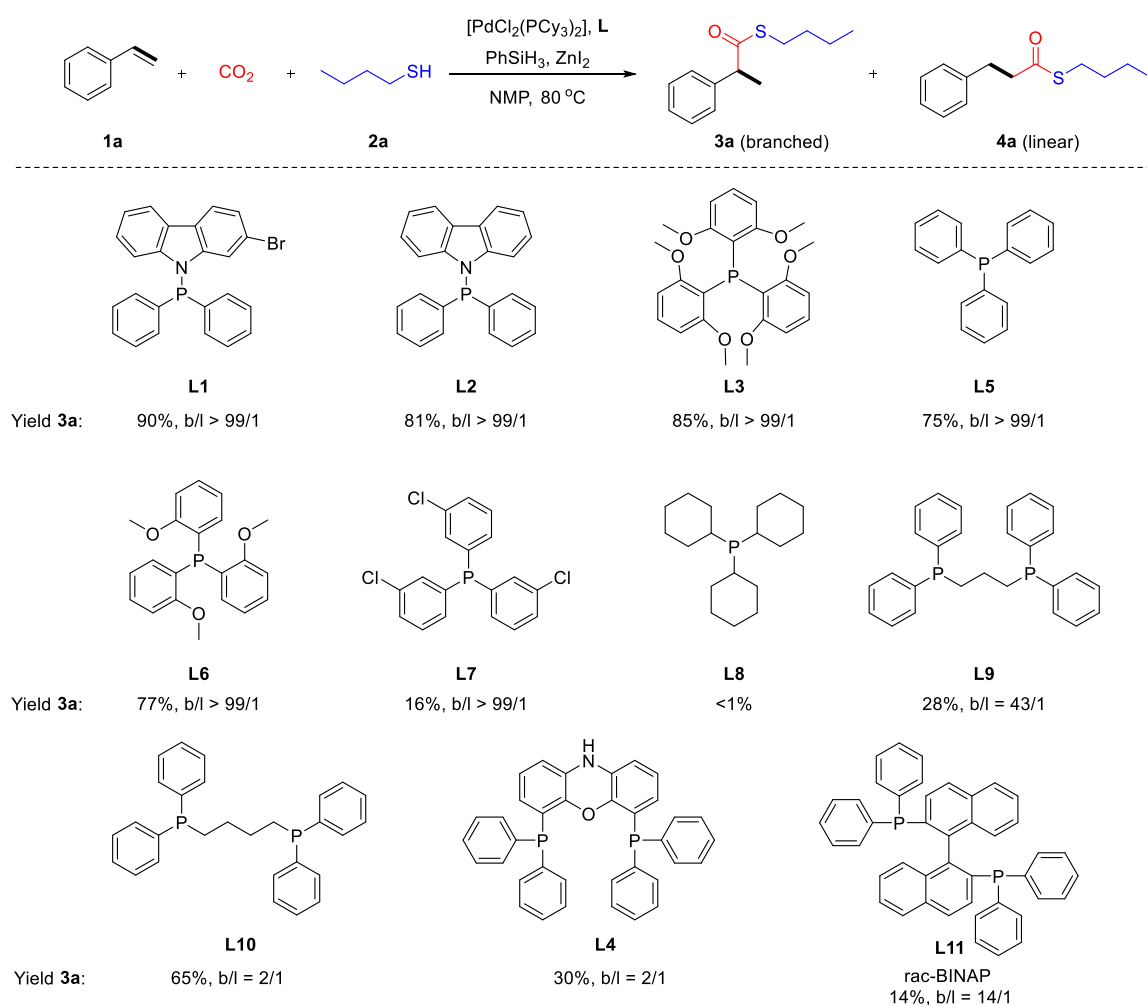

<sup>a</sup>Reaction conditions: **1a** (0.2 mmol), **2a** (1.7 equiv.),  $\text{PdCl}_2(\text{PCy}_3)_2$  (5.0 mol%), ligand (10.0 mol%),  $\text{ZnI}_2$  (20.0 mol%),  $\text{PhSiH}_3$  (1.8 equiv.),  $\text{CO}_2$  (20 bar), NMP (0.5 mL), stirred at 80 °C for 18 h. Yield of **3a** and **4a** was determined by GC analysis using dodecane as the internal standard.

**Table S2.** Solvent screening for the thiocarbonylation of styrene<sup>a</sup>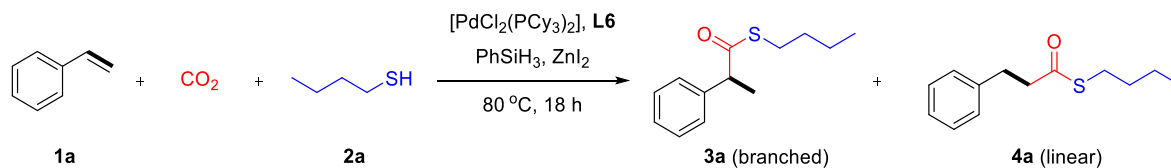

| Entry    | Solvent/mL         | Yield of <b>3a</b> /% | Yield of <b>4a</b> /% |
|----------|--------------------|-----------------------|-----------------------|
| <b>1</b> | <b>NMP</b>         | <b>70</b>             | <b>0.5</b>            |
| 2        | Toluene            | 4                     | 2                     |
| 3        | CH <sub>3</sub> CN | 0.3                   | 0.2                   |
| 4        | DMF                | 40                    | 3                     |
| 5        | DMSO               | 0.4                   | 3                     |
| 6        | Diglyme            | 1                     | 3                     |
| 7        | THF                | 0.5                   | 0.2                   |

<sup>a</sup>Reaction conditions: **1a** (0.2 mmol), **2a** (1.7 equiv.), PdCl<sub>2</sub>(PCy<sub>3</sub>)<sub>2</sub> (5.0 mol%), ligand (10.0 mol%), ZnI<sub>2</sub> (20 mol%), PhSiH<sub>3</sub> (1.8 equiv.), CO<sub>2</sub> (20 bar), solvent (0.5 mL), stirred at 80 °C for 18 h. Yield of **3a** and **4a** was determined by GC analysis using dodecane as the internal standard.

**Table S3.** Temperature and time screening for the thiocarbonylation of styrene<sup>a</sup>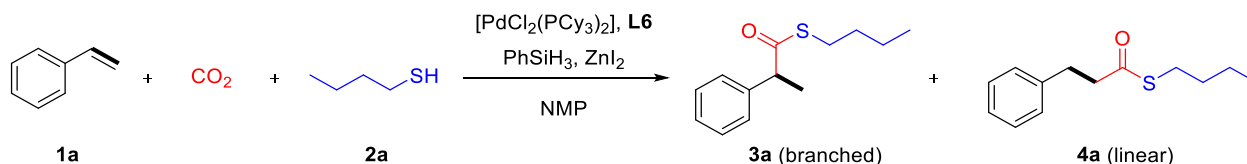

| Entry    | Temperature/°C | Time/h    | Yield of <b>3a</b> /% | Yield of <b>4a</b> /% |
|----------|----------------|-----------|-----------------------|-----------------------|
| 1        | 80             | 12        | 70                    | 0.5                   |
| 2        | 40             | 12        | 53                    | 1                     |
| 3        | 60             | 12        | 58                    | 3                     |
| 4        | 80             | 8         | 65                    | 1                     |
| 5        | 80             | 16        | 72                    | 0.3                   |
| <b>6</b> | <b>80</b>      | <b>18</b> | <b>77</b>             | <b>0.5</b>            |

<sup>a</sup>Reaction conditions: **1a** (0.2 mmol), **2a** (1.7 equiv.), PdCl<sub>2</sub>(PCy<sub>3</sub>)<sub>2</sub> (5 mol%), ligand (10.0 mol%), ZnI<sub>2</sub> (20 mol%), PhSiH<sub>3</sub> (1.8 equiv.), CO<sub>2</sub> (20 bar), NMP (0.5 mL). Yield of **3a** and **4a** was determined by GC analysis using dodecane as the internal standard.

**Table S4.** The amount of solvent screening for the thiocarbonylation of styrene<sup>a</sup>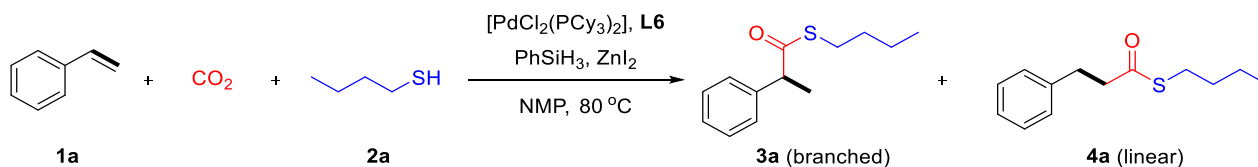

| Entry    | NMP/mL     | Yield of <b>3a</b> /% | Yield of <b>4a</b> /% |
|----------|------------|-----------------------|-----------------------|
| <b>1</b> | <b>0.5</b> | <b>77</b>             | <b>0.5</b>            |
| 2        | 0.3        | 69                    | 1                     |
| 3        | 0.7        | 75                    | 1                     |

<sup>a</sup>Reaction conditions: **1a** (0.2 mmol), **2a** (1.7 equiv.), PdCl<sub>2</sub>(PCy<sub>3</sub>)<sub>2</sub> (5.0 mol%), ligand (10.0 mol%), ZnI<sub>2</sub> (20 mol%), PhSiH<sub>3</sub> (1.8 equiv.), CO<sub>2</sub> (20 bar), stirred at 80 °C for 18 h. Yield of **3a** and **4a** was determined by GC analysis using dodecane as the internal standard.

**Table S5.** The pressure of carbon dioxide screening for the thiocarbonylation of styrene<sup>a</sup>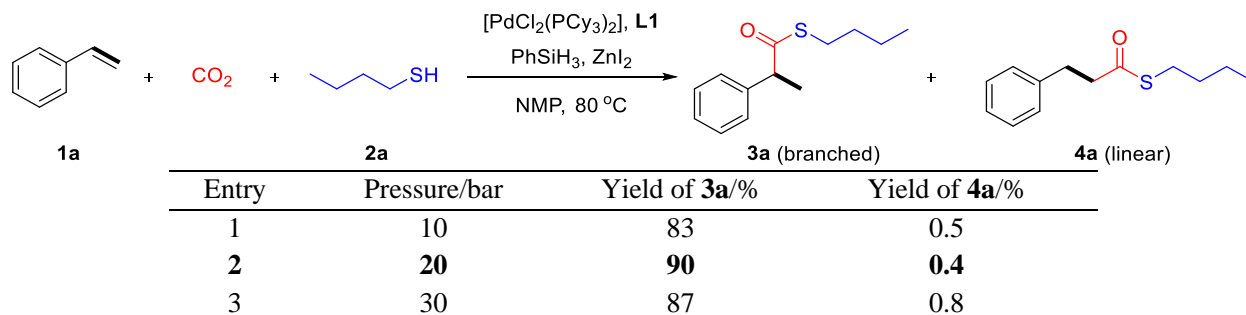

<sup>a</sup>Reaction conditions: **1a** (0.2 mmol), **2a** (1.7 equiv.), PdCl<sub>2</sub>(PCy<sub>3</sub>)<sub>2</sub> (5.0 mol%), ligand (10.0 mol%), ZnI<sub>2</sub> (20 mol%), PhSiH<sub>3</sub> (1.8 equiv.), NMP (0.5 mL), stirred at 80 °C for 18 h. Yield of **3a** and **4a** was determined by GC analysis using dodecane as the internal standard.

## 4. Deuterium-labelling experiments

**Scheme S2.** Deuterium-labelling experiments<sup>a</sup>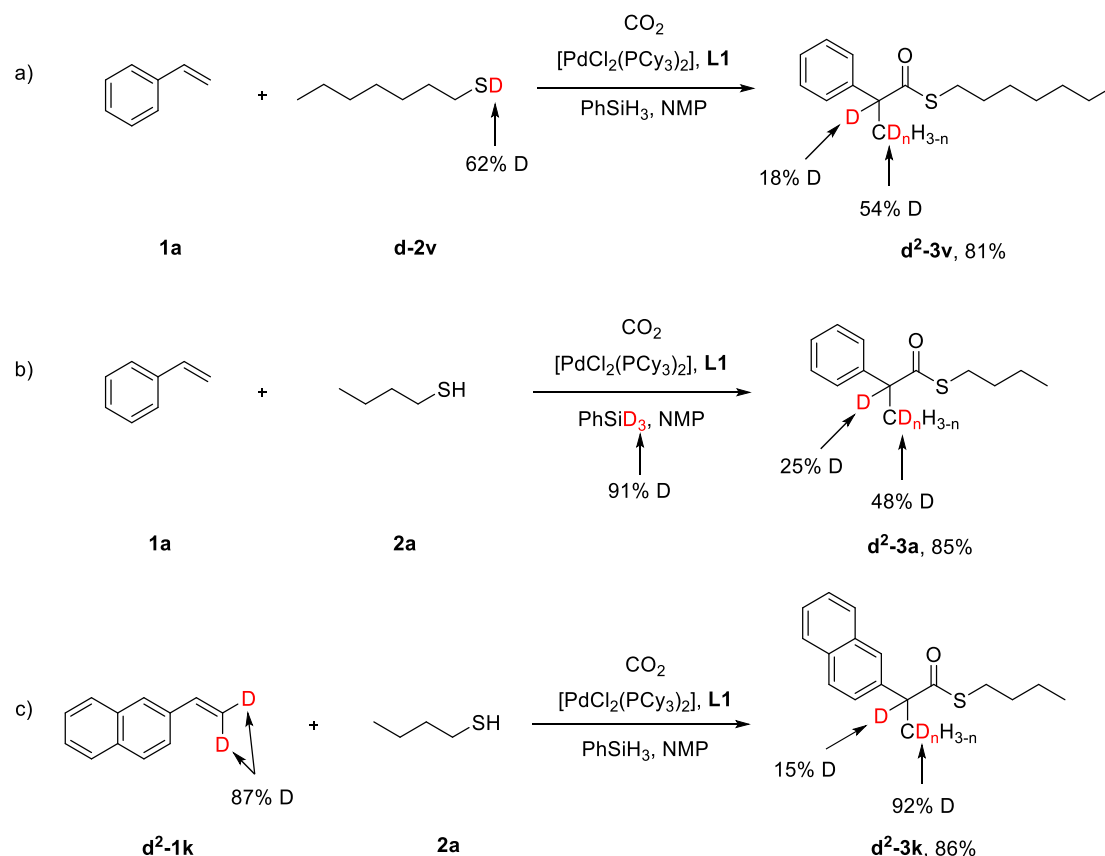

<sup>a</sup>Reaction conditions: **d<sup>2</sup>-1k/1a** (0.2 mmol), **2a/d-2v** (1.7 equiv.), PdCl<sub>2</sub>(PCy<sub>3</sub>)<sub>2</sub> (5.0 mol%), **L1** (10.0 mol%), [Si-H/D] (1.8 equiv.), CO<sub>2</sub> (20 bar), NMP (0.5 mL), and stirred at 80 °C for 18 h. Isolated yields of branched products.

### 4.1 Deuterium-labeled heptanethiol (**d-2v**) were synthesized by following a literature procedure.<sup>3</sup>

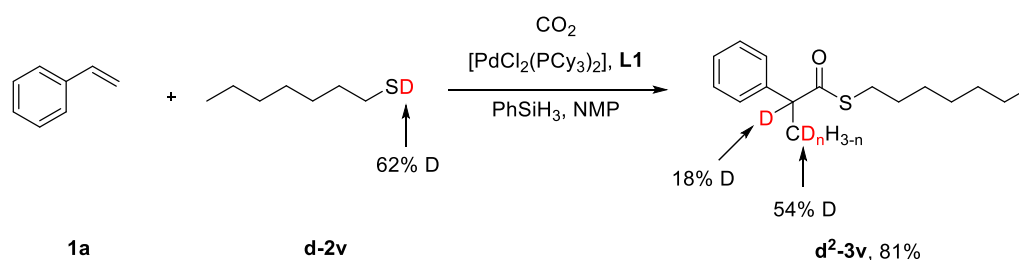

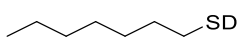

**heptane-1-thiol-*d* (d-2v)**

$^1\text{H}$  NMR (400 MHz,  $\text{CDCl}_3$ ):  $\delta = 2.50$  (q,  $J = 8.0$  Hz, 2H), 1.59 (p,  $J = 8.2$  Hz, 2H), 1.40 - 1.23 (m, 9H), 0.86 (t,  $J = 8.0$  Hz, 3H).

$$D\% = 1 - \frac{\frac{9.00 - 8.62}{1}}{\frac{1.97 + 2.01 + 8.00 + 3.02}{2 + 2 + 8 + 3}} = 1 - \frac{0.380}{1.000} = 62\%$$

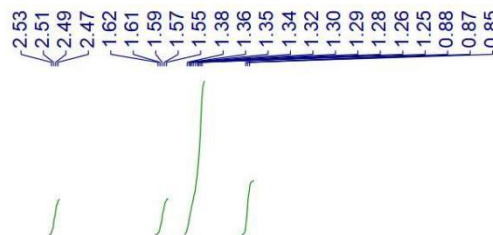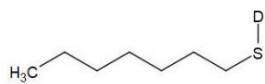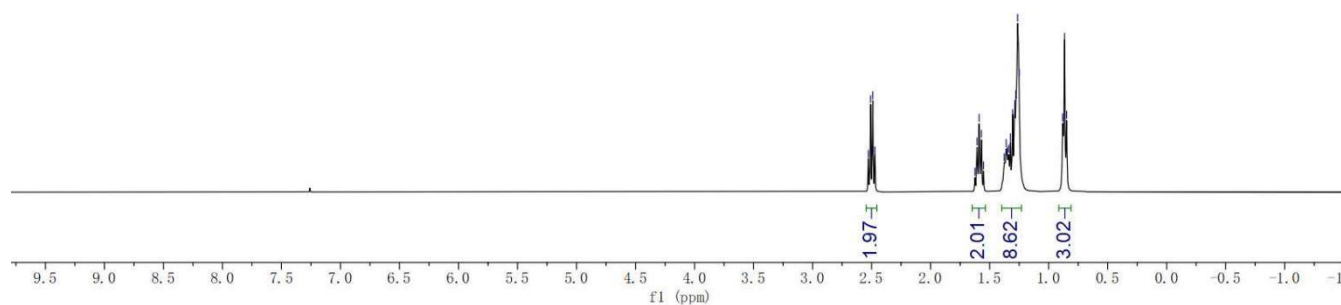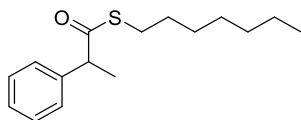

***S*-heptyl 2-phenylpropanethioate (3v)<sup>4</sup>**

Yellow liquid (Yield = 85%; 44.9 mg);  $^1\text{H}$  NMR (400 MHz,  $\text{CDCl}_3$ ):  $\delta = 7.27$  (t,  $J = 8.0$  Hz, 3H), 7.22 (d,  $J = 8.0$  Hz, 2H), 3.83 (q,  $J = 8.0$  Hz, 1H), 2.77 (m, 2H), 1.48 (m,  $J = 8.0$  Hz, 3H), 1.45 (t,  $J = 8.0$  Hz, 2H), 1.26 - 1.16 (m, 8H), 0.81 (t,  $J = 8.0$  Hz, 3H).

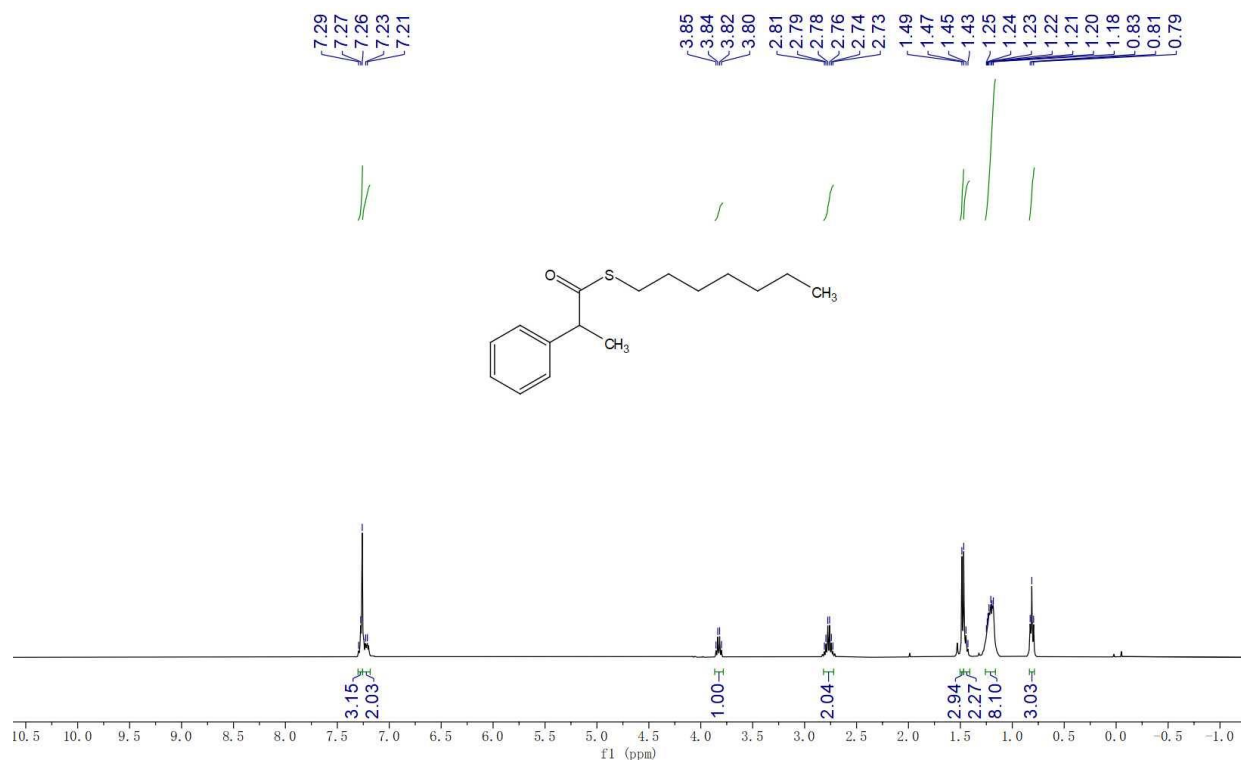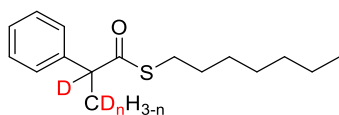

**S-heptyl 2-phenylpropanethioate-2,3,3,3-*d*<sub>4</sub> (*d*<sup>2</sup>-3*v*)**

Yellow liquid (Yield = 81%; 42.8 mg); <sup>1</sup>H NMR (400 MHz, CDCl<sub>3</sub>): δ = 7.33 - 7.15 (m, 5H), 3.83 (q, *J* = 8.0 Hz, 1H), 2.77 (m, 2H), 1.48 (d, *J* = 8.0 Hz, 2H), 1.46 (t, *J* = 8.0 Hz, 2H), 1.26 - 1.17 (m, 8H), 0.81 (t, *J* = 8.0 Hz, 3H).

$$D(D)\% = 1 - \frac{\frac{0.80}{1}}{\frac{4.74 + 1.94 + 1.94 + 7.91 + 3.00}{5 + 2 + 2 + 8 + 3}} = 1 - \frac{0.8}{0.977} = 18\%$$

$$D(CD_nH_{3-n})\% = 3 - \frac{\frac{2.40}{4.74 + 1.94 + 1.94 + 7.91 + 3.00}}{\frac{5 + 2 + 2 + 8 + 3}} = 3 - \frac{2.40}{0.977} = 54\%$$



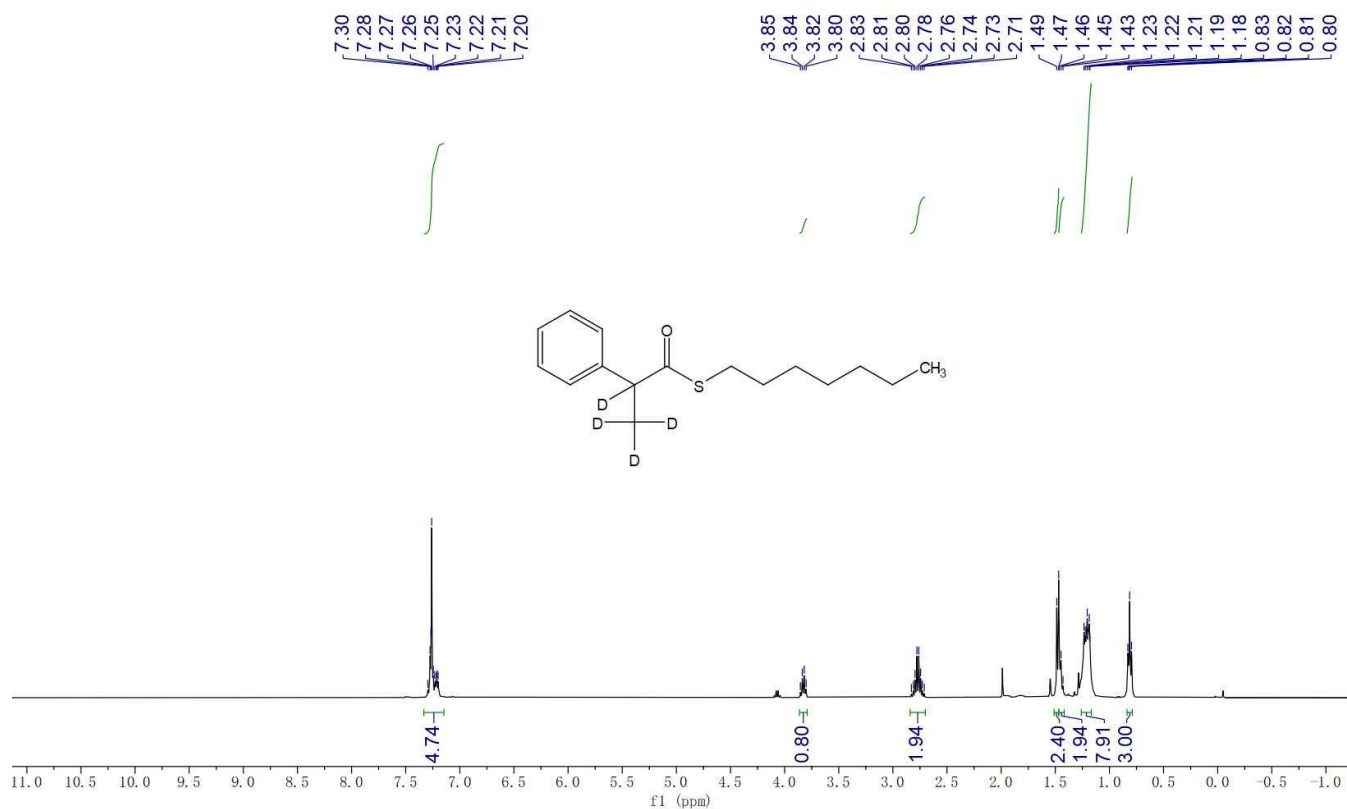

#### 4.2 Deuterium-labeled phenylsilane were synthesized by following a literature procedure.<sup>5</sup>

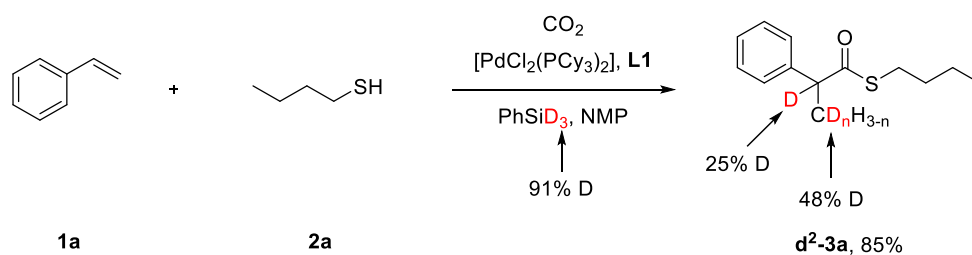

PhSiD<sub>3</sub>

**phenylsilane-*d*<sub>3</sub>**

<sup>1</sup>H NMR (400 MHz, CDCl<sub>3</sub>): δ = 7.63 - 7.58 (m, 2H), 7.41 - 7.35 (m, 3H).

$$D\% = 1 - \frac{\frac{0.26}{3}}{\frac{2.00 + 3.08}{2 + 3}} = 1 - \frac{0.087}{1.016} = 91\%$$

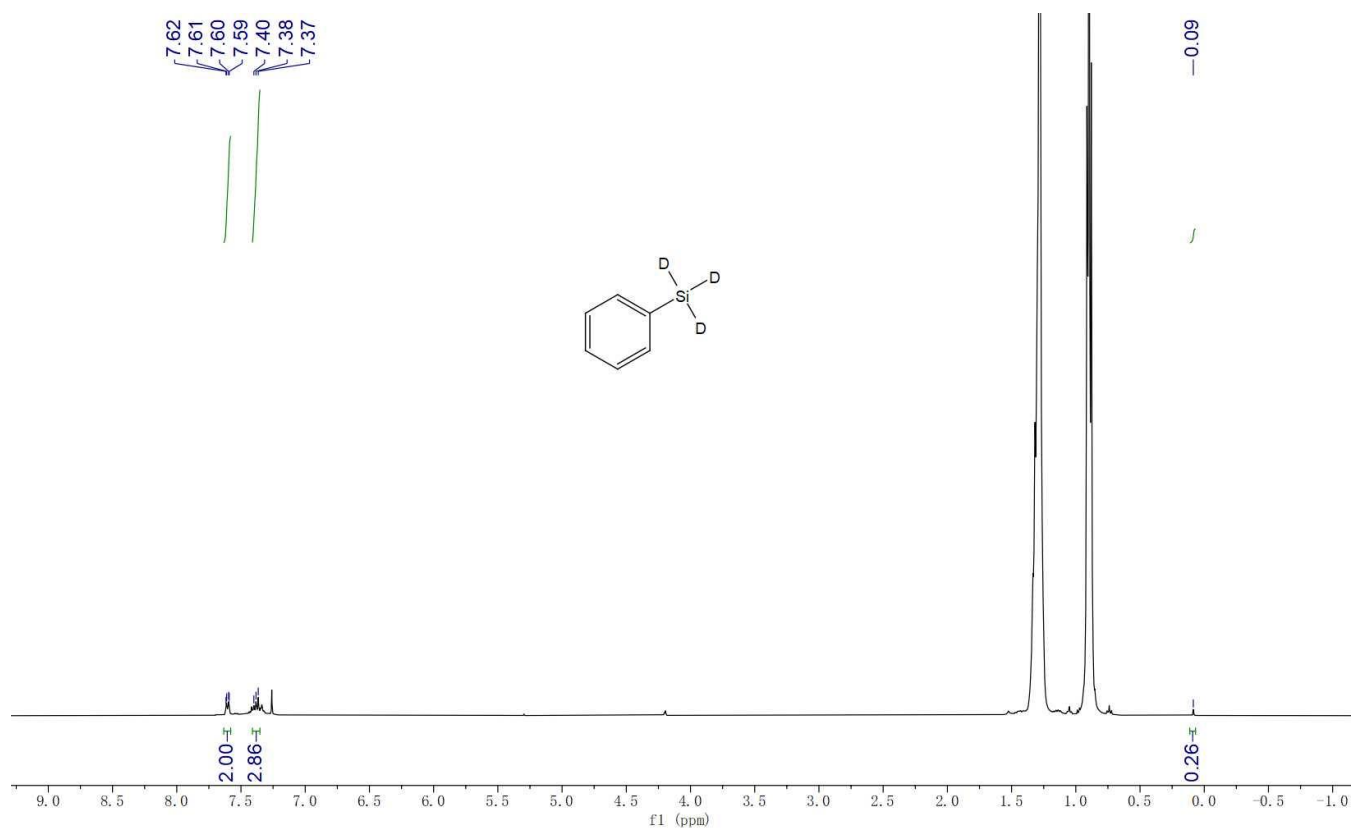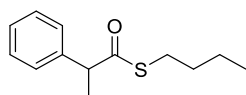

**S-butyl 2-phenylpropanethioate (3a)<sup>6</sup>**

Yellow liquid (Yield = 90%; 40.0 mg); <sup>1</sup>H NMR (400 MHz, CDCl<sub>3</sub>): δ = 7.26 (d, *J* = 4.0 Hz, 4H), 7.22 (t, *J* = 4.0 Hz, 1H), 3.83 (q, *J* = 8.0 Hz, 1H), 2.77 (m, 2H), 1.48 (d, *J* = 8.0 Hz, 3H), 1.45 (t, *J* = 8.0 Hz, 2H), 1.28 (m, 2H), 0.83 (t, *J* = 8.0 Hz, 3H).

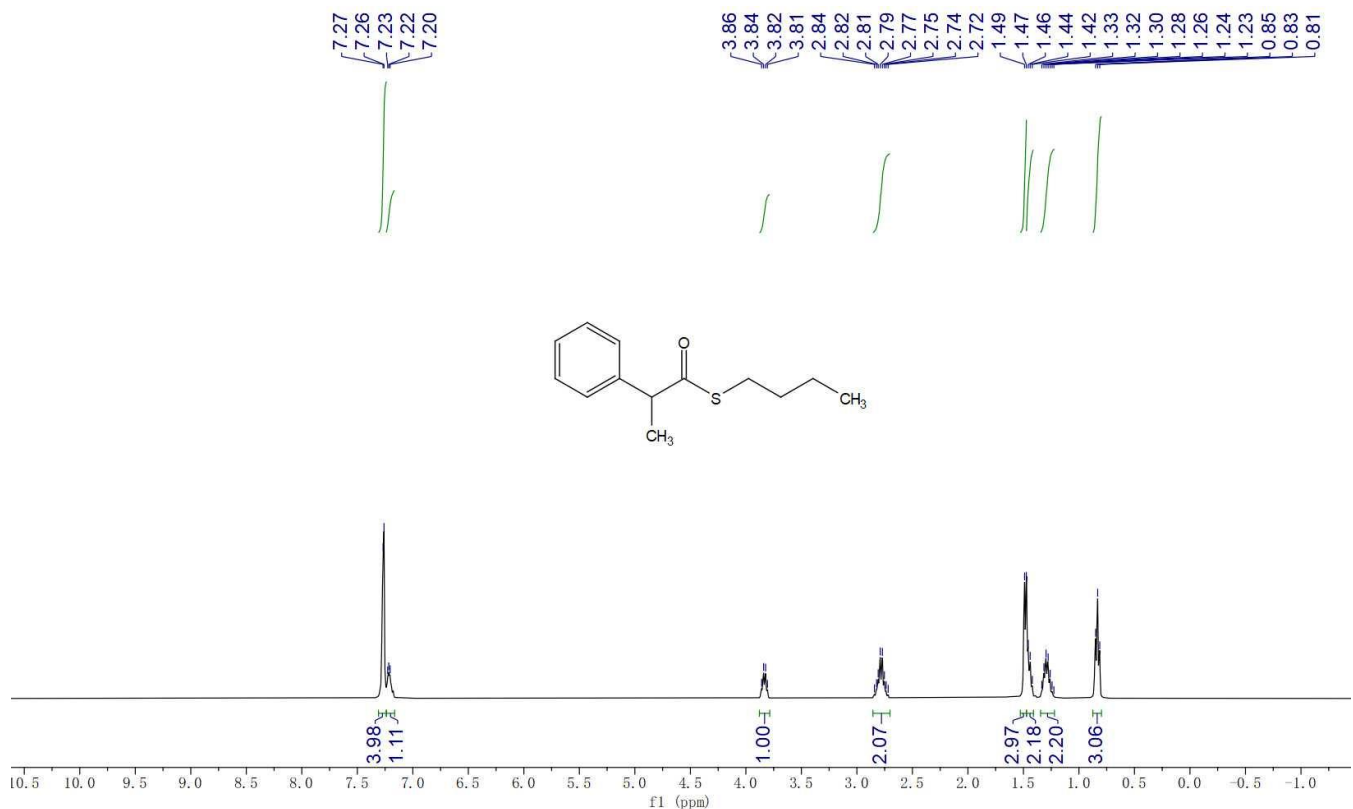

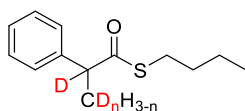

### S-butyl 2-phenylpropanethioate-2,3,3,3-*d*<sub>4</sub> (*d*<sup>2</sup>-3a)

Yellow liquid (Yield = 85%; 37.7 mg); <sup>1</sup>H NMR (400 MHz, CDCl<sub>3</sub>): δ = 7.31 - 7.19 (m, 5H), 3.83 (m, 1H), 2.85 - 2.69 (m, 2H), 1.48 (d, *J* = 8.0 Hz, 3H), 1.46 - 1.40 (m, 2H), 1.30 (m, 2H), 0.83 (t, *J* = 8.0 Hz, 3H).

$$D(D)\% = 1 - \frac{\frac{0.76}{1}}{\frac{4.99 + 2.03 + 2.06 + 2.16 + 3.00}{5 + 2 + 2 + 2 + 3}} = 1 - \frac{0.76}{1.017} = 25\%$$

$$D(CD_nH_{3-n})\% = 3 - \frac{\frac{2.56}{4.99 + 2.03 + 2.06 + 2.16 + 3.00}}{\frac{5 + 2 + 2 + 2 + 3}} = 3 - \frac{2.56}{1.017} = 48\%$$

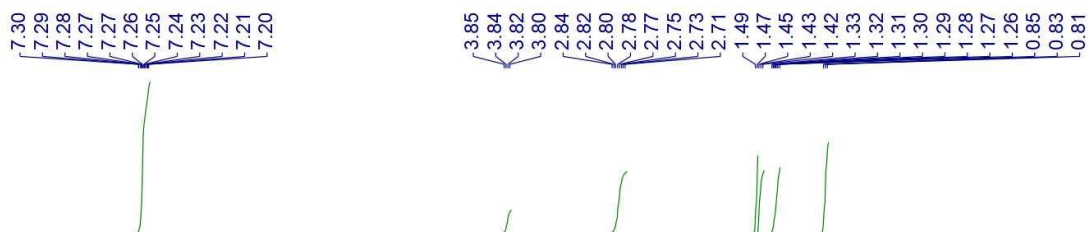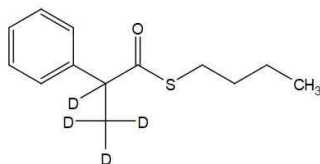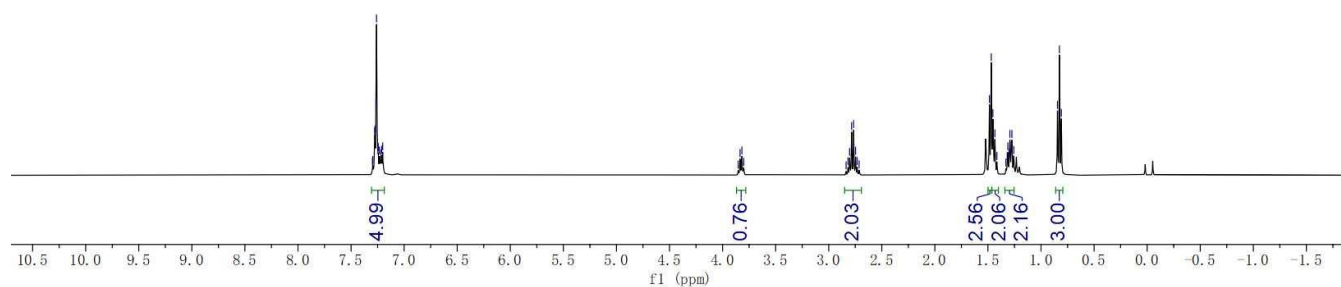

**4.3 Deuterium-labeled 2-Vinylnaphthalene (*d*<sup>2</sup>-1k) were synthesized by following a literature procedure.<sup>7</sup>**

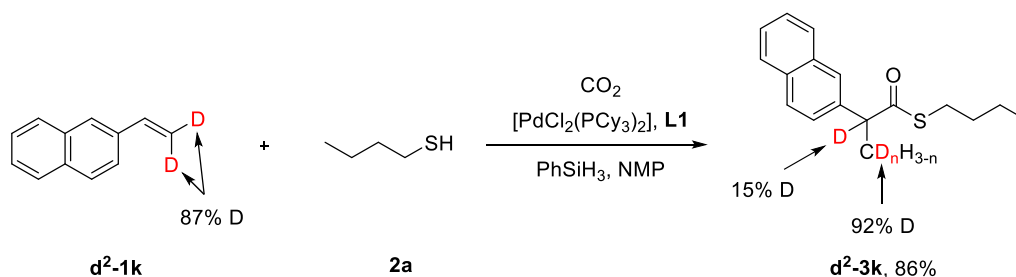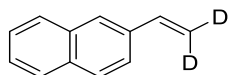

### 2-(vinyl-2,2- $d_2$ )naphthalene ( $d^2\text{-1k}$ )

White solid;  $^1\text{H NMR}$  (400 MHz,  $\text{CDCl}_3$ ):  $\delta = 7.81$  (m, 3H), 7.76 (s, 1H), 7.64 (d,  $J = 8.0$  Hz, 1H), 7.50 - 7.40 (m, 2H), 6.88 (s, 1H).

$$\text{D\%} = 1 - \frac{\frac{0.13 + 0.13}{1 + 1}}{\frac{3.08 + 1.08 + 1.04 + 2.07 + 1}{3 + 1 + 1 + 2 + 1}} = 1 - \frac{0.130}{1.034} = 87\%$$

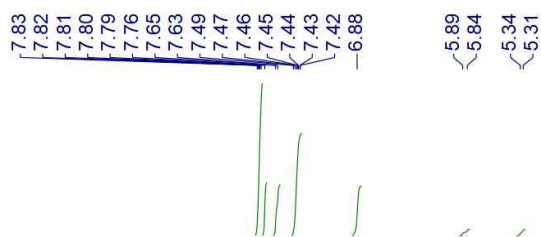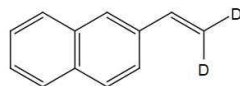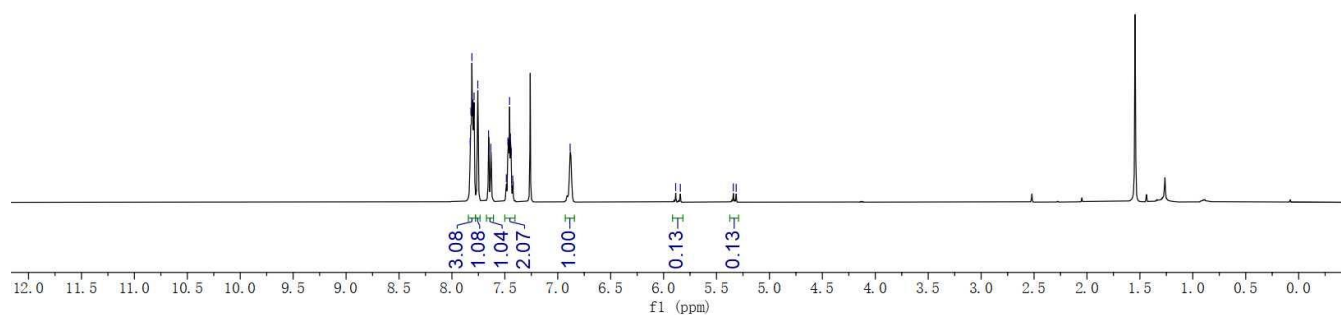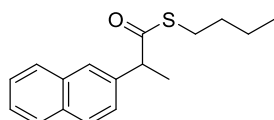

### S-butyl 2-(naphthalen-2-yl)propanethioate (**3k**)

Yellow liquid (Yield = 91%; 49.5 mg);  $^1\text{H NMR}$  (400 MHz,  $\text{CDCl}_3$ ):  $\delta = 7.81$  (d,  $J = 8.0$  Hz, 3H), 7.76 (s, 1H), 7.45 (m, 3H), 4.05 (q,  $J = 8.0$  Hz, 1H), 2.83 (m, 2H), 1.62 (d,  $J = 4.0$  Hz, 3H), 1.50 (m, 2H), 1.34 (m, 2H), 0.87 (t,  $J = 8.0$  Hz, 3H). HRMS (ESI)  $[\text{C}_{17}\text{H}_{20}\text{OS}+\text{H}]^+$  calculated mass 273.1316, measured mass 273.1308.

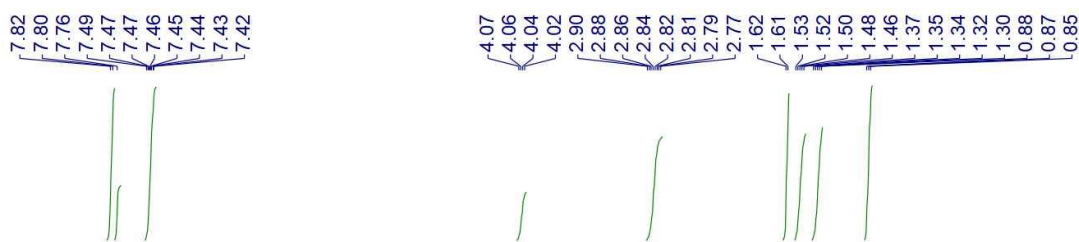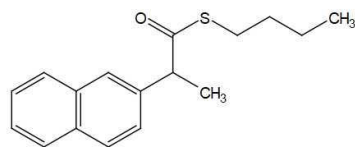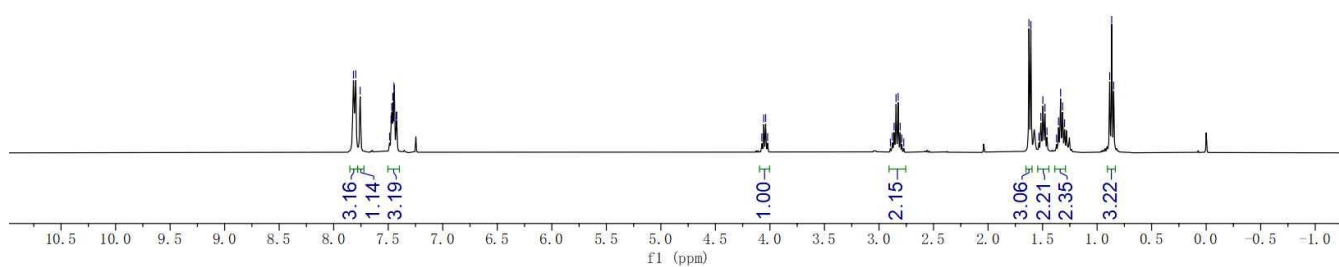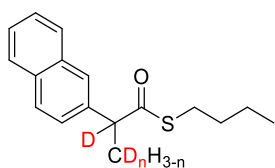

**S-butyl 2-(naphthalen-2-yl) propanethioate-2,3,3,3-*d*<sub>4</sub> (d<sup>2</sup>-3k)**

Yellow liquid (Yield = 86%; 46.8 mg); <sup>1</sup>H NMR (400 MHz, CDCl<sub>3</sub>): δ = 7.73 (d, *J* = 8.0 Hz, 3H), 7.68 (s, 1H), 7.44 - 7.32 (m, 3H), 3.97 (t, *J* = 8.0 Hz, 1H), 2.77 (m, 2H), 1.52 (m, 2H), 1.42 (m, 2H), 1.26 (m, 2H), 0.79 (t, *J* = 8.0 Hz, 3H).

$$D(D)\% = 1 - \frac{0.86}{1} = 1 - \frac{0.86}{1.011} = 15\%$$

$$\frac{2.94 + 0.95 + 2.86 + 2.05 + 2.23 + 2.14 + 3}{3 + 1 + 3 + 2 + 2 + 2 + 3}$$

$$D(CD_nH_{3-n})\% = 3 - \frac{2.1}{1.011} = 92\%$$

$$\frac{2.94 + 0.95 + 2.86 + 2.05 + 2.23 + 2.14 + 3}{3 + 1 + 3 + 2 + 2 + 2 + 3}$$

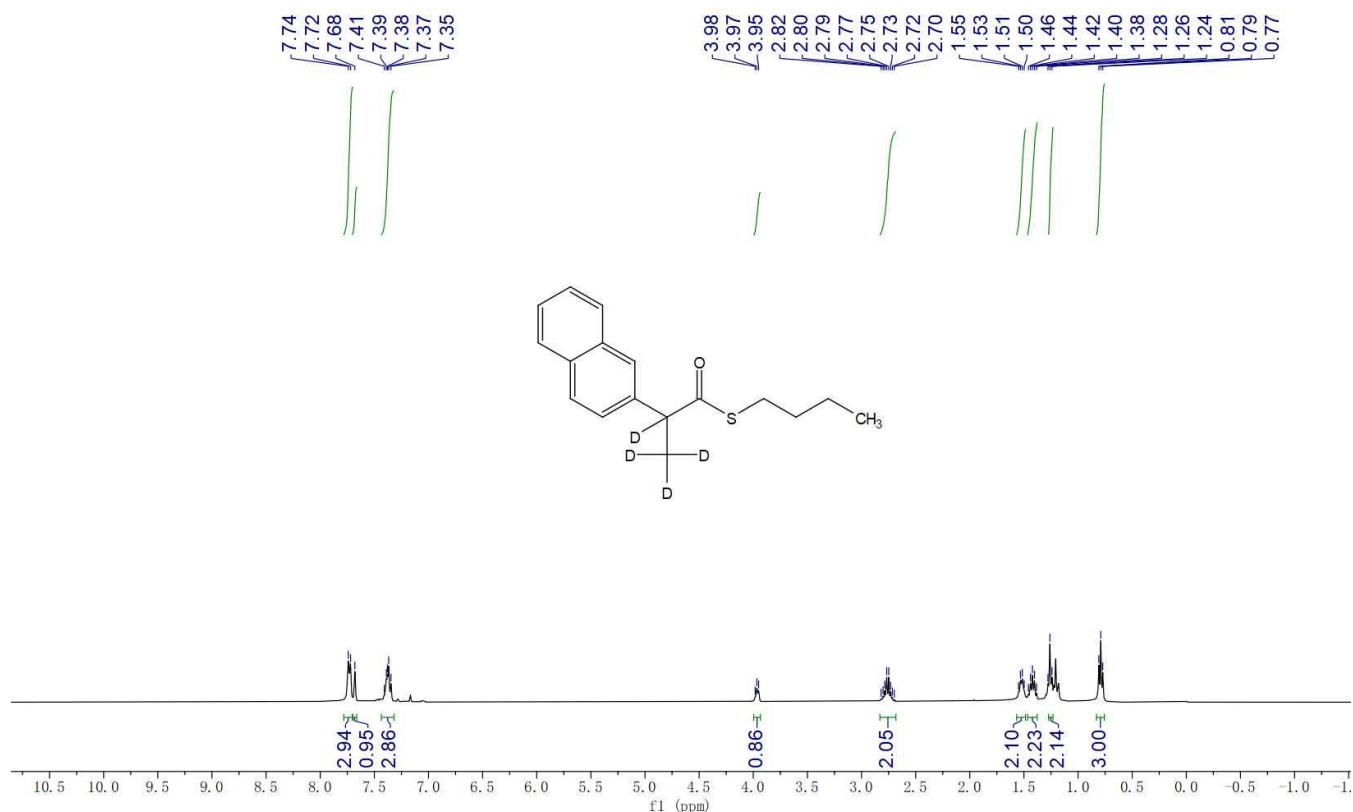

## 5. Mechanism verification experiments

### 5.1 Mechanism of free radical elimination<sup>a</sup>

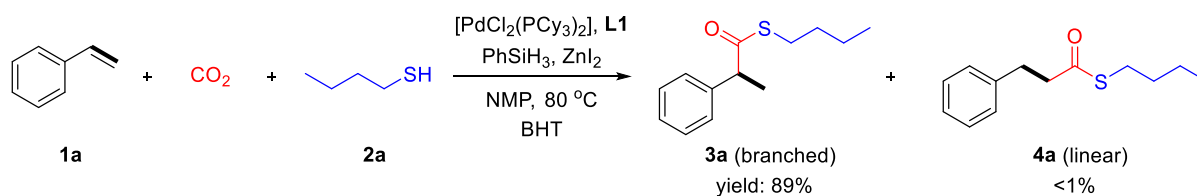

<sup>a</sup>Reaction conditions: **1a** (0.2 mmol), **2a** (1.7 equiv.), PdCl<sub>2</sub>(PCy<sub>3</sub>)<sub>2</sub> (5.0 mol%), ligand (10 mol%), ZnI<sub>2</sub> (20 mol%), PhSiH<sub>3</sub> (1.8 equiv.), butylated hydroxytoluene (1.0 equiv.), NMP (0.5 mL), CO<sub>2</sub> (20 bar), and stirred at 80 °C for 18 h. Yield of **3a** and **4a** was determined by GC analysis using dodecane as the internal standard.

### 5.2 Verification of palladium hydrogen species.

In the glove box, add 0.01 mmol (8 mg) of PdCl<sub>2</sub>(PCy<sub>3</sub>)<sub>2</sub>, 0.4 mmol (44 μL) of phenylsilane and 500 μL of deuterated benzene into the young tube, then remove the glove box and heat at 80 °C for 4 h to test <sup>1</sup>H NMR and <sup>31</sup>P NMR: negative hydrogen signals were not found and <sup>31</sup>P-NMR signal (25.09 ppm) of PdCl<sub>2</sub>(PCy<sub>3</sub>)<sub>2</sub> was observed (**experiment A**). After adding 0.4 mmol (36 μL) C<sub>4</sub>H<sub>9</sub>SH to the above reaction solution and heated at 80 °C for 1 h to test <sup>1</sup>H NMR and <sup>31</sup>P NMR: a new negative hydrogen signals at -14.36 ppm and a new <sup>31</sup>P-NMR signal at 42.10 ppm were observed might be due to the formation of trans Pd(PCy<sub>3</sub>)<sub>2</sub>(H)(SC<sub>4</sub>H<sub>9</sub>) (**experiment B**). Furthermore, heating the above mixture at 80 °C for 4 h and 18 h increased the negative hydrogen signal and <sup>31</sup>P-NMR signal (42.10 ppm) (**experiments C and D**).

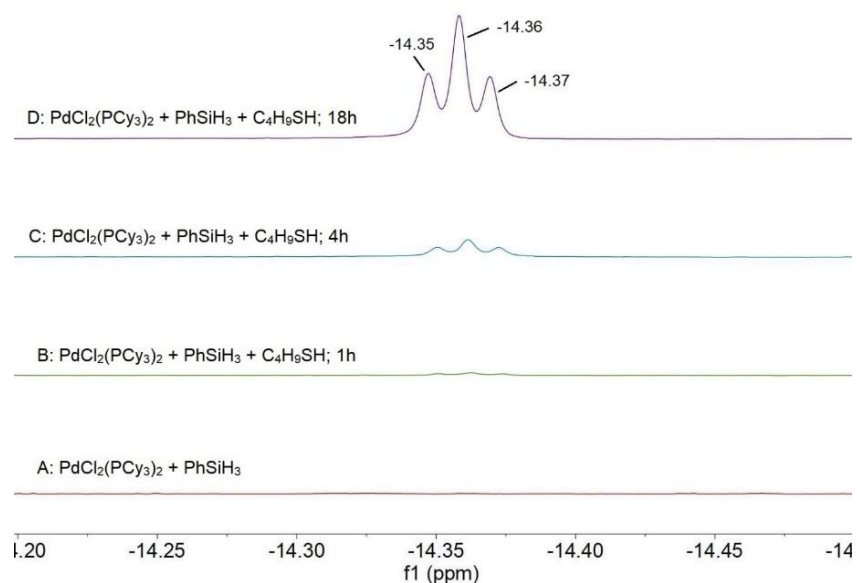

**Figure S2.**  $^1\text{H}$  NMR spectra of various reaction components in  $\text{C}_6\text{D}_6$ . Reaction conditions: A:  $\text{PdCl}_2(\text{PCy}_3)_2$  (0.01 mmol),  $\text{PhSiH}_3$  (0.4 mmol) in  $\text{C}_6\text{D}_6$  at  $80^\circ\text{C}$  for 4 h; B:  $\text{PdCl}_2(\text{PCy}_3)_2$  (0.01 mmol),  $\text{PhSiH}_3$  (0.4 mmol),  $n\text{BuSH}$  (0.4 mmol) in  $\text{C}_6\text{D}_6$  at  $80^\circ\text{C}$  for 1 h; C:  $\text{PdCl}_2(\text{PCy}_3)_2$  (0.01 mmol),  $\text{PhSiH}_3$  (0.4 mmol),  $n\text{BuSH}$  (0.4 mmol) in  $\text{C}_6\text{D}_6$  at  $80^\circ\text{C}$  for 4 h; D:  $\text{PdCl}_2(\text{PCy}_3)_2$  (0.01 mmol),  $\text{PhSiH}_3$  (0.4 mmol) and  $n\text{BuSH}$  (0.4 mmol) in  $\text{C}_6\text{D}_6$  at  $80^\circ\text{C}$  for 18 h.

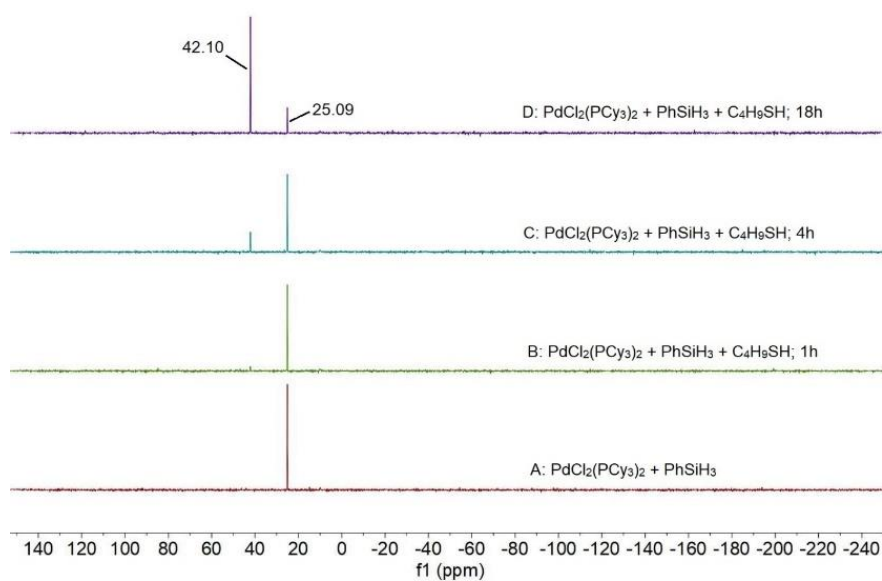

**Figure S3.**  $^{31}\text{P}$  NMR spectra of various reaction components in  $\text{C}_6\text{D}_6$ . Reaction conditions: A:  $\text{PdCl}_2(\text{PCy}_3)_2$  (0.01 mmol),  $\text{PhSiH}_3$  (0.4 mmol) in  $\text{C}_6\text{D}_6$  at  $80^\circ\text{C}$  for 4 h; B:  $\text{PdCl}_2(\text{PCy}_3)_2$  (0.01 mmol),  $\text{PhSiH}_3$  (0.4 mmol),  $n\text{BuSH}$  (0.4 mmol) in  $\text{C}_6\text{D}_6$  at  $80^\circ\text{C}$  for 1 h; C:  $\text{PdCl}_2(\text{PCy}_3)_2$  (0.01 mmol),  $\text{PhSiH}_3$  (0.4 mmol),  $n\text{BuSH}$  (0.4 mmol) in  $\text{C}_6\text{D}_6$  at  $80^\circ\text{C}$  for 4 h; D:  $\text{PdCl}_2(\text{PCy}_3)_2$  (0.01 mmol),  $\text{PhSiH}_3$  (0.4 mmol) and  $n\text{BuSH}$  (0.4 mmol) in  $\text{C}_6\text{D}_6$  at  $80^\circ\text{C}$  for 18 h.

### 5.3 Reduction of $\text{CO}_2$ with phenylsilane<sup>4</sup>

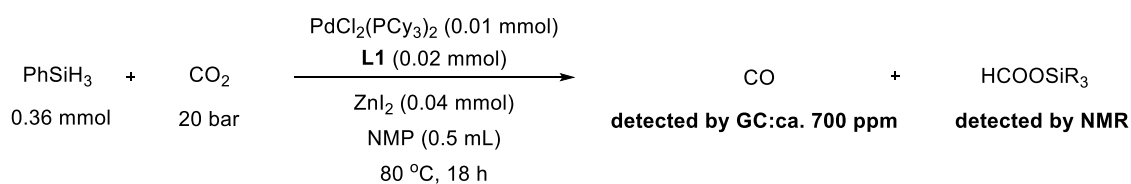

**Scheme S3.** Reaction conditions: PdCl<sub>2</sub>(PCy<sub>3</sub>)<sub>2</sub> (0.01 mmol), **L1** (0.02 mmol), ZnI<sub>2</sub> (0.04 mmol), PhSiH<sub>3</sub> (0.36 mmol), NMP (0.5 mL), CO<sub>2</sub> (20 bar) and stirred at 80 °C for 18 h.

In a glove box, a 4 mL sealing tube with a magnetic stirring bar was charged with phenylsilane (0.36 mmol), PdCl<sub>2</sub>(PCy<sub>3</sub>)<sub>2</sub> (0.01 mmol), **L1** (0.02 mmol), ZnI<sub>2</sub> (0.04 mmol), and NMP (0.5 mL). Then the tube was sealed, taken out of the glove box and placed into the autoclave. The autoclave was sealed and purged three times with CO<sub>2</sub> gas, then pressurized to 20 atm. Finally, the autoclave was heated at 80 °C for 18 h with stirring. After the reaction finished, the autoclave was cooled to room temperature and the gas phase was carefully vented to a balloon. GC analysis of the gas sample indicates the presence of a small amount of CO (ca. 700 ppm) and residual CO<sub>2</sub> in the gas phase of the reaction system (**Figure S4**). The sticky turbid mixture was filtered through a short cotton plug, and an aliquot of the filtrate was sampled and analyzed by <sup>1</sup>H-/<sup>13</sup>C-NMR analyses. As shown in **Figures S5 and S6**, the signal corresponding to silyl formate was observed in <sup>1</sup>H- and <sup>13</sup>C-NMR spectra.

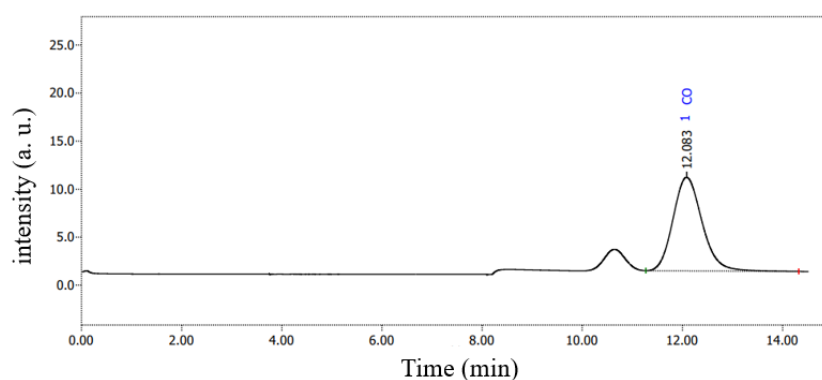

**Figure S4.** GC chromatograms for CO ( $t_R = 12.08$  min) gases generated in situ from the reaction of PhSiH<sub>3</sub> and CO<sub>2</sub> in reaction conditions.

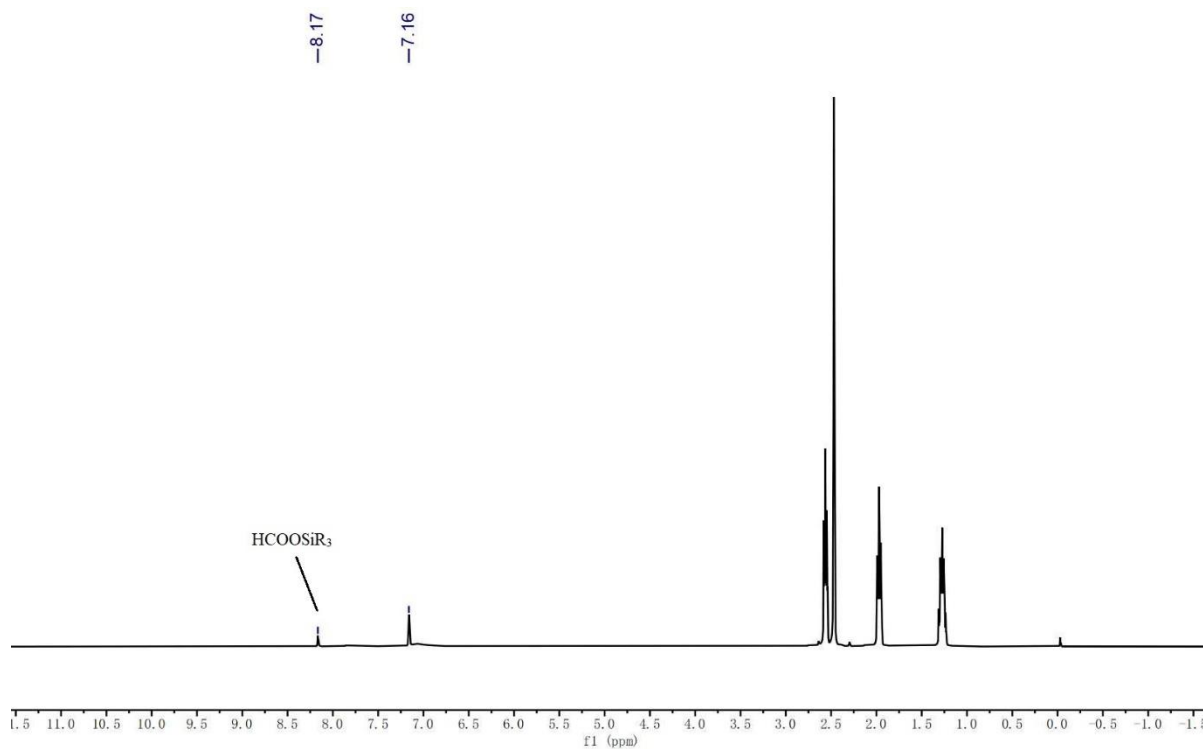

**Figure S5.** <sup>1</sup>H NMR spectra (C<sub>6</sub>D<sub>6</sub>) of the liquid phase in the reaction of CO<sub>2</sub> with PhSiH<sub>3</sub> in standard conditions, indicating the in-situ generation of HCOOSiR<sub>3</sub>.



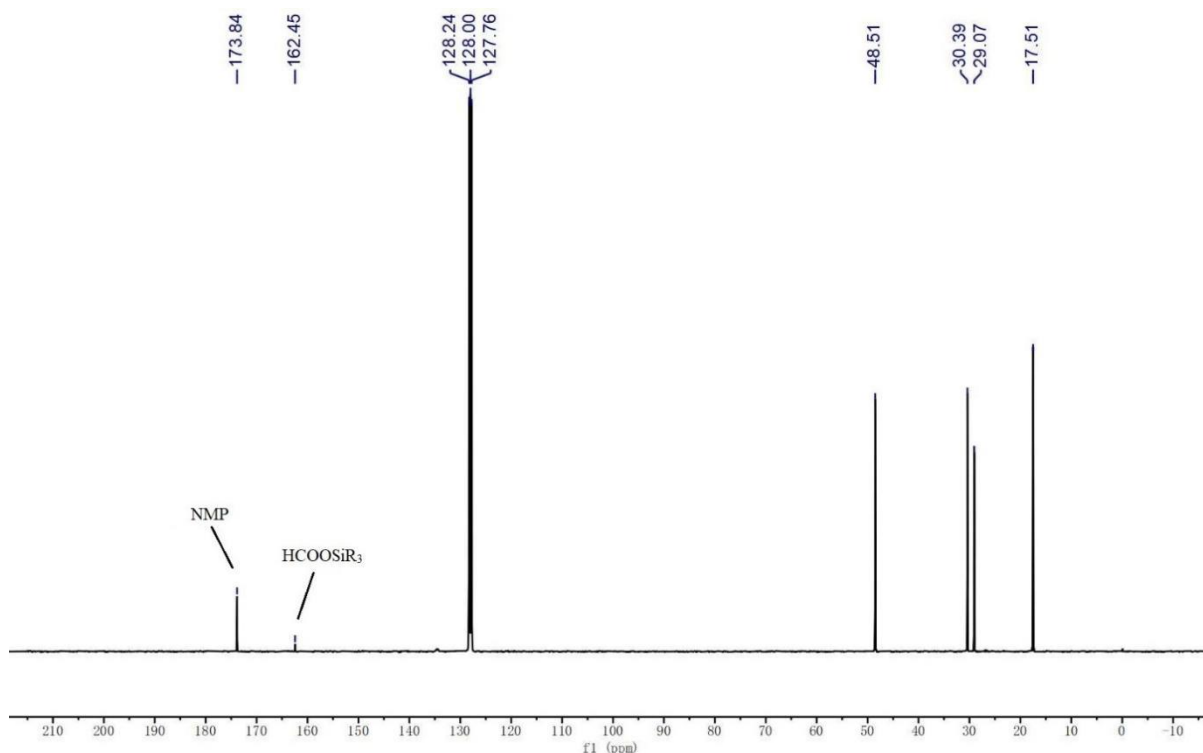

**Figure S6.**  $^{13}\text{C}$  NMR spectra ( $\text{C}_6\text{D}_6$ ) of the liquid phase in the reaction of  $\text{CO}_2$  with  $\text{PhSiH}_3$  in standard conditions, indicating the in-situ generation of  $\text{HCOOSiR}_3$ .

#### 5.4 Carboxylic acid species capture experiment

In the glove box, add styrene (0.2 mmol), *n*BuSH (1.7 equiv.),  $\text{PdCl}_2(\text{PCy}_3)_2$  (5.0 mol%), **L1** (10.0 mol%),  $\text{PhSiH}_3$  (1.8 equiv.),  $\text{ZnI}_2$  (20 mol%), NMP (300  $\mu\text{L}$ ) and 100  $\mu\text{L}$  of deuterated benzene into the J. Young/valved NMR tube, then remove the glove box and purge with  $^{13}\text{CO}_2$ , heat at 80  $^\circ\text{C}$  for 30 min to test  $^{13}\text{C}$  NMR: a peak at 177.34 ppm in  $^{13}\text{C}$  NMR was observed might correspond to the formation of carboxylate Pd species **D**,  $^{13}\text{C}$ -labelled  $\text{CO}_2$  NMR signals appeared at  $\delta=128.24$  ppm, NMP signal was observed at 173.73 ppm, product **3a** signal was detected at  $\delta=200.34$  ppm, demonstrating the formation of the thioester product **3a** using  $^{13}\text{C}$ -labelled  $\text{CO}_2$  under our conditions.

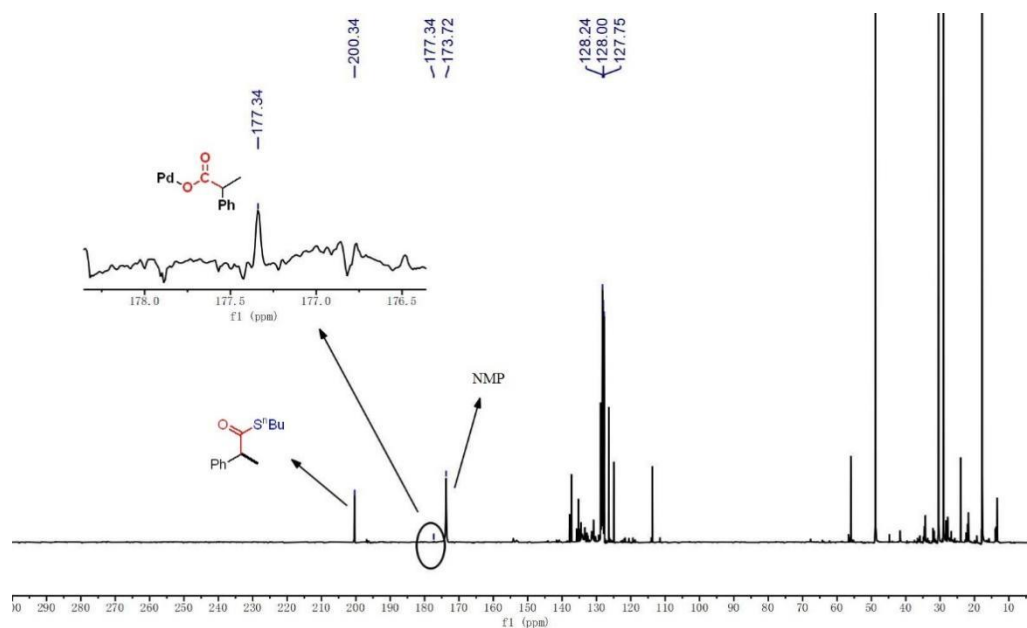

**Figure S7.** *In-situ*  $^{13}\text{C}$  NMR spectra.

To a 4 mL sealing tube in a nitrogen-filled glovebox, the styrene (0.2 mmol), *n*BuSH (1.7 equiv.), PdCl<sub>2</sub>(PCy<sub>3</sub>)<sub>2</sub> (5.0 mol%), **L1** (10.0 mol%), PhSiH<sub>3</sub> (1.8 equiv.), ZnI<sub>2</sub> (20 mol%), were added followed by addition of solvent *N*-methylpyrrolidone (NMP) (0.5 mL). Then the tube was sealed, taken out of the glovebox and placed into the autoclave. The autoclave was sealed and purged three times with CO<sub>2</sub> gas, then pressurized to 20 atm. At last, the autoclave was heated at 80 °C for 1 h with stirring. After the reaction finished, the autoclave was cooled to room temperature and the pressure was carefully released. After that, the reaction system was quenched by adding aqueous hydrochloric acid, and the crude <sup>1</sup>H NMR spectrum was tested. Peaks were found for the 2-phenylpropionic acid species.

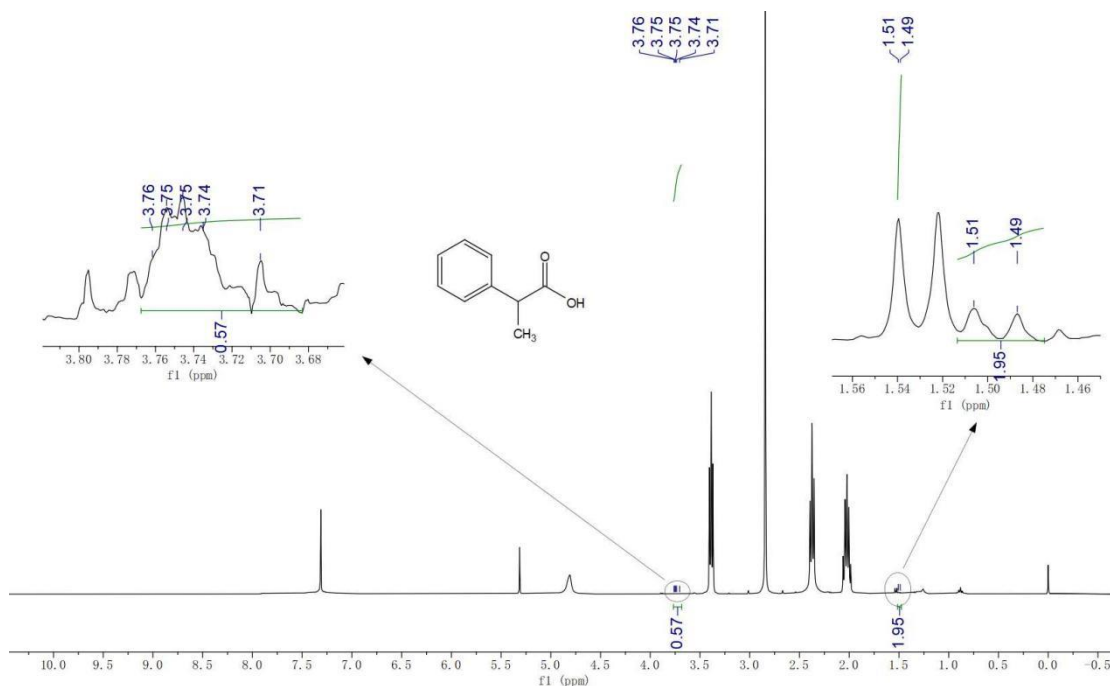

**Figure S8.** <sup>1</sup>H NMR spectra of hydrochloric acid quenching experiment.

In order to verify whether the peak marked in the **Figure S8** is the 2-phenylpropionic acid species, we added a drop of 2-phenylpropionic acid species to the NMR tube and found that it was indeed the peak of the 2-phenylpropionic acid.

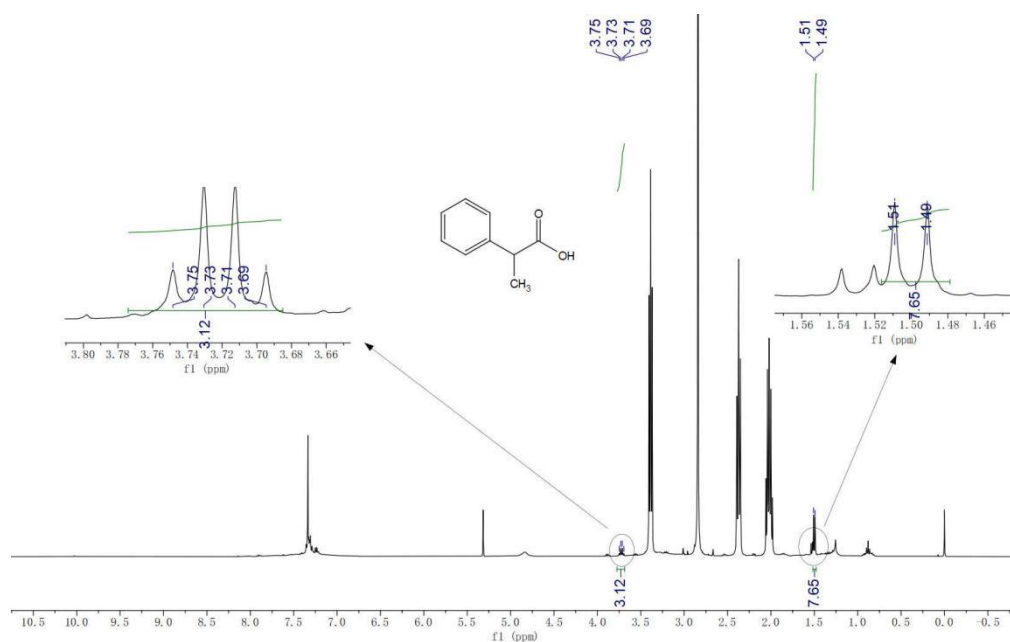

**Figure S9.** <sup>1</sup>H NMR spectra of hydrochloric acid quenching experiment.

## 5.5 CO<sub>2</sub> and <sup>13</sup>CO competition experiments

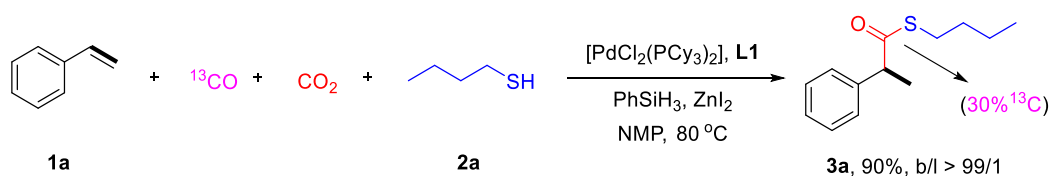

**Experimental Procedure:** To a 4 mL sealing tube in a nitrogen-filled glovebox, the styrene **1a** (0.2 mmol), *n*BuSH **2a** (1.7 equiv.), PdCl<sub>2</sub>(PCy<sub>3</sub>)<sub>2</sub> (5 mol%), ligand **L1** (10 mol%), phenylsilane (1.8 equiv.), zinc iodide (20 mol%) and a stirring bar were added followed by addition of solvent *N*-methylpyrrolidone (NMP) (0.5 mL). Then the tube was sealed, taken out of the glovebox and placed into the autoclave. The autoclave was sealed and purged three times with CO<sub>2</sub> gas, then filled with 1 bar <sup>13</sup>CO, then filled with 20 bar <sup>12</sup>CO<sub>2</sub>. At last, the autoclave was heated at 80 °C for 18 h with stirring. After the reaction finished, the autoclave was cooled to room temperature and the pressure was carefully released. The product was purified by silica gel giving the isolated yield. Only 30% <sup>13</sup>C incorporation was found in the carboxyl group of the thioester product form HRMS (Figure S10).

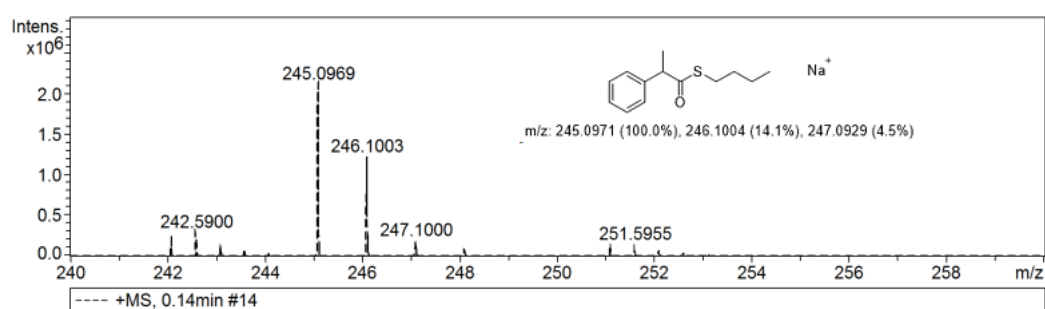

| #  | m/z      | Res.  | S/N    | I       | I %   | FWHM   |
|----|----------|-------|--------|---------|-------|--------|
| 1  | 98.9752  | 10525 | 535.0  | 71377   | 3.4   | 0.0094 |
| 2  | 105.0698 | 10356 | 634.8  | 85969   | 4.1   | 0.0101 |
| 3  | 122.0577 | 10664 | 1122.1 | 153995  | 7.3   | 0.0114 |
| 4  | 149.0449 | 12361 | 383.0  | 58122   | 2.7   | 0.0121 |
| 5  | 158.0505 | 12484 | 1116.5 | 177795  | 8.4   | 0.0127 |
| 6  | 158.5521 | 12739 | 660.2  | 105342  | 5.0   | 0.0124 |
| 7  | 165.0583 | 12980 | 425.9  | 70027   | 3.3   | 0.0127 |
| 8  | 185.1139 | 11214 | 304.9  | 54777   | 2.6   | 0.0165 |
| 9  | 223.1154 | 12808 | 374.7  | 76068   | 3.6   | 0.0174 |
| 10 | 242.0884 | 14009 | 1191.8 | 256411  | 12.1  | 0.0173 |
| 11 | 242.5900 | 14103 | 1376.2 | 296383  | 14.0  | 0.0172 |
| 12 | 243.0912 | 13320 | 712.1  | 153668  | 7.3   | 0.0182 |
| 13 | 243.5913 | 12443 | 267.6  | 57851   | 2.7   | 0.0196 |
| 14 | 245.0969 | 13308 | 9758.5 | 2119519 | 100.0 | 0.0184 |
| 15 | 246.1003 | 13384 | 5626.7 | 1221953 | 57.7  | 0.0184 |
| 16 | 247.1000 | 10556 | 902.2  | 196348  | 9.3   | 0.0234 |
| 17 | 248.1006 | 11066 | 381.7  | 83363   | 3.9   | 0.0224 |
| 18 | 251.0940 | 14413 | 596.1  | 131337  | 6.2   | 0.0174 |
| 19 | 251.5955 | 14350 | 687.9  | 151757  | 7.2   | 0.0175 |
| 20 | 252.0982 | 10945 | 350.5  | 77472   | 3.7   | 0.0230 |
| 21 | 263.1077 | 13425 | 424.2  | 95457   | 4.5   | 0.0196 |
| 22 | 264.1105 | 13544 | 248.3  | 55908   | 2.6   | 0.0195 |
| 23 | 301.1410 | 14130 | 707.9  | 165817  | 7.8   | 0.0213 |
| 24 | 353.1421 | 15474 | 342.4  | 83691   | 3.9   | 0.0228 |
| 25 | 353.6439 | 15655 | 578.2  | 141410  | 6.7   | 0.0226 |
| 26 | 354.1462 | 13740 | 478.6  | 117055  | 5.5   | 0.0258 |
| 27 | 354.6500 | 11712 | 317.9  | 77707   | 3.7   | 0.0303 |
| 28 | 355.1542 | 10698 | 193.3  | 47262   | 2.2   | 0.0332 |
| 29 | 360.3235 | 14459 | 359.7  | 88016   | 4.2   | 0.0249 |
| 30 | 413.2660 | 14551 | 591.8  | 143673  | 6.8   | 0.0284 |

**Figure S10.** Mass spectrum of product **3a**.

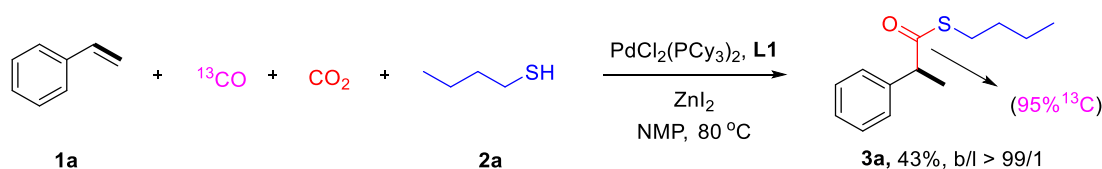

**Experimental Procedure:** To a 4 mL sealing tube in a nitrogen-filled glovebox, the styrene **1a** (0.2 mmol), *n*BuSH **2a** (1.7 equiv.), PdCl<sub>2</sub>(PCy<sub>3</sub>)<sub>2</sub> (5 mol%), ligand **L1** (10 mol%), zinc iodide (20 mol%) and a stirring bar were added followed by addition of solvent *N*-methylpyrrolidone (NMP) (0.5 mL). Then the tube was sealed, taken out of the glovebox and placed into the autoclave. The autoclave was sealed and purged three times with CO<sub>2</sub> gas, then filled with 1bar <sup>13</sup>CO, then filled with 20 bar <sup>12</sup>CO<sub>2</sub>. At last, the autoclave was heated at 80 °C for 18 h with stirring. After the reaction finished, the autoclave was cooled to room temperature and the pressure was carefully released. The product was purified by silica gel giving the isolated yield. 95% <sup>13</sup>C incorporation was found in the carboxyl group of the thioester product from HRMS (<sup>13</sup>C-labeled product as the main product) (Figure S11).

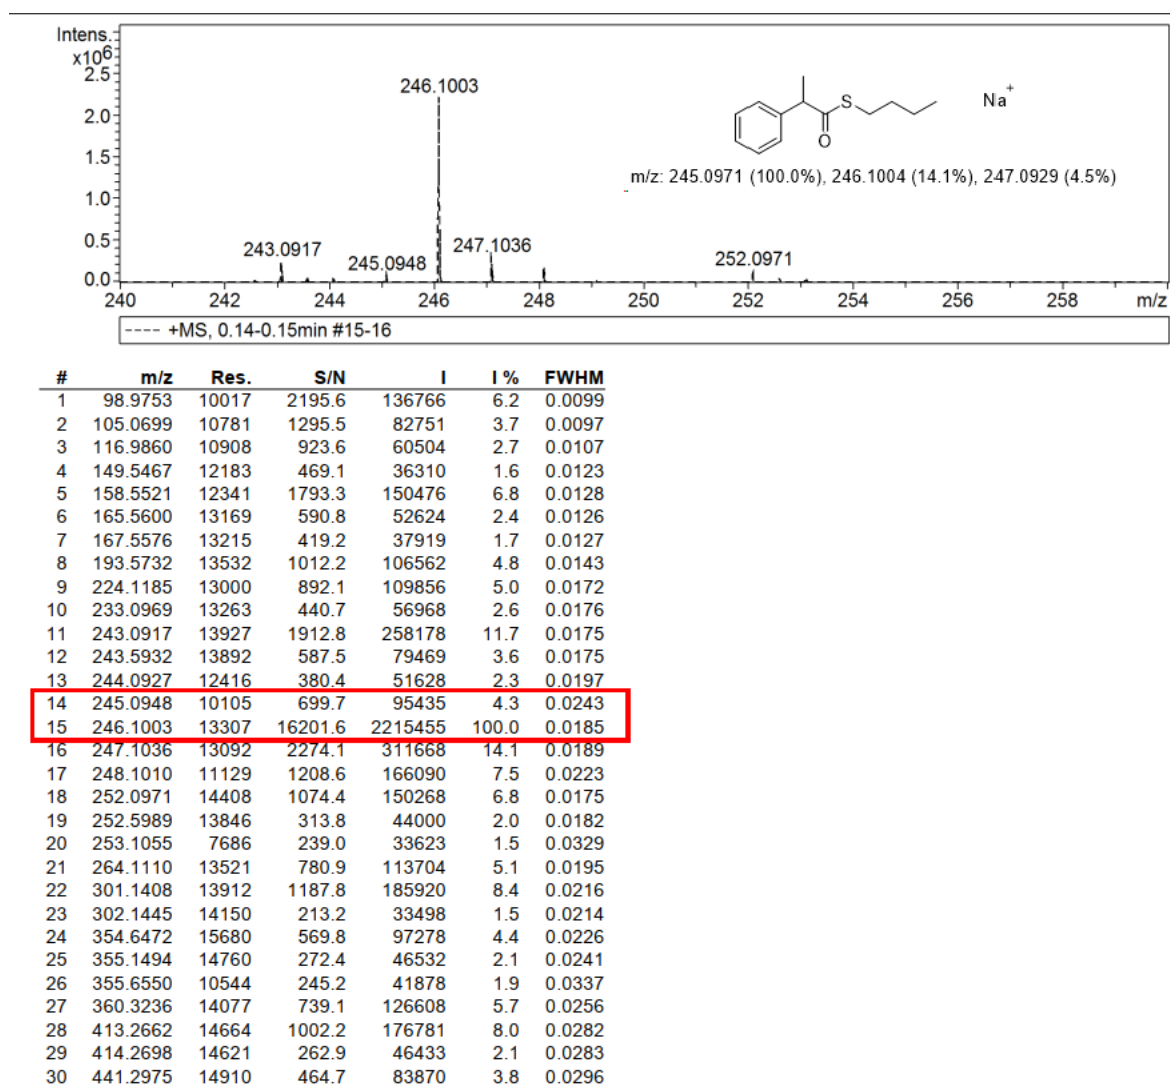

**Figure S11.** Mass spectrum of product **3a**.

## 5.6 Details of DFT calculations

To further probe the nature of the regioselective thiocarbonylation of alkenes with carbon dioxide, DFT calculations at the GAUSSIAN 09<sup>8</sup> series of programs at the ωB97X-D level were carried out on the whole catalytic cycles shown in **Figure S12**. The LANL2DZ basis set for the Pd center and the 6-311+G (d, p) basis sets were used for all the other atoms for the geometry

optimizations. To roughly evaluate the effect of the solvent, the polarized continuous model (PCM) in *N*-methylpyrrolidone as the solvent was employed in the calculations. For the convenience of calculation, the molecular treatment is simplified. As shown in **Figure S12**, active Pd-H species **B** is generated from the oxidative addition of methyl thiol with Pd(0) species **A** with the sulfur atom at the *trans* position,<sup>9</sup> which is endothermic by 1.44 kcal/mol and the calculated results agree well with experiments present in **Scheme S2-a** and **Figures S2-S3**. After insertion by styrene, benzyl-Pd complex **C** is generated, and this reaction is exothermic by 1.98 kcal/mol. Then benzyl-Pd complex **C** was transformed into carboxylate Pd species R(CO<sub>2</sub>)Pd **D** upon the migratory insertion of CO<sub>2</sub> into the Pd-C bond. One O atom of CO<sub>2</sub> approaches the Pd center and C of CO<sub>2</sub> interacts with C connected to the  $\alpha$ -C of styrene to form a five-membered ring, which the length of the Pd-O and Pd-H bond is 2.12 and 2.78 Å, respectively. And the reaction is exothermic by 5.60 kcal/mol, which is favorable in energy.

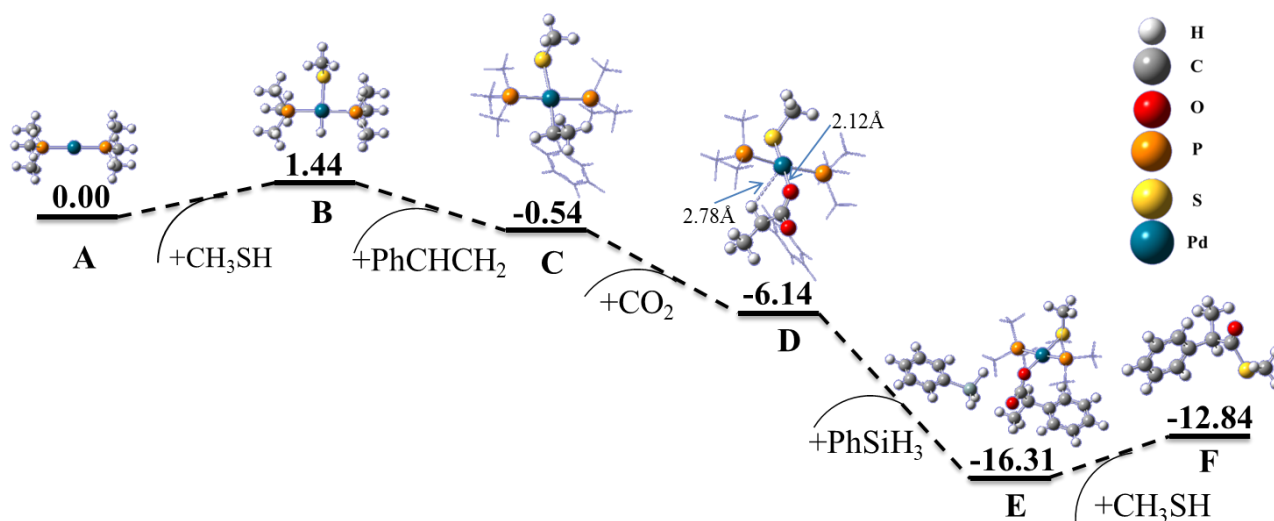

**Figure S12.** Mechanistic studies for Pd-catalyzed thiocarbonylation of alkene using CO<sub>2</sub> by DFT (kcal/mol).

Optimized energies in *N*-methylpyrrolidone solvent

**Table S6.** Optimized energies in *N*-methylpyrrolidone solvent (a.u.,  $\omega$ B97X-D, 298.15K)

| Intermediate                                 | E(a.u.)      |
|----------------------------------------------|--------------|
| <b>A</b> -PdL <sub>2</sub>                   | -1048.846925 |
| CH <sub>3</sub> SH                           | -438.687864  |
| <b>B</b> -L <sub>2</sub> PdHSCH <sub>3</sub> | -1487.532497 |
| PhCHCH <sub>2</sub>                          | -309.511727  |
| <b>C</b>                                     | -1797.047381 |
| CO <sub>2</sub>                              | -188.592907  |
| <b>D</b>                                     | -1985.649209 |
| PhSiH <sub>3</sub>                           | -522.836131  |
| <b>E</b>                                     | -2508.470862 |
| <b>F</b>                                     | -1562.760348 |

Cartesian coordinates of key stationary points in DFT study (unit in Å).

| A | Coordinates (Angstroms) |             |            |
|---|-------------------------|-------------|------------|
|   | X                       | Y           | Z          |
| P | 2.32251100              | -0.00029800 | 0.00006900 |
| C | 3.15082600              | -0.46645100 | 1.57220700 |
| H | 2.85100400              | -1.47705800 | 1.85653500 |
| H | 4.23908200              | -0.42923100 | 1.46772900 |

|                    |                         |             |             |
|--------------------|-------------------------|-------------|-------------|
| H                  | 2.84172000              | 0.21880200  | 2.36391900  |
| C                  | 3.14681600              | 1.59632000  | -0.38155000 |
| H                  | 4.23539200              | 1.49081400  | -0.35861000 |
| H                  | 2.83914000              | 1.93786700  | -1.37176700 |
| H                  | 2.84228800              | 2.34730200  | 0.35012400  |
| C                  | 3.15098800              | -1.12723000 | -1.19106600 |
| H                  | 2.85167100              | -2.15705500 | -0.98691600 |
| H                  | 2.84172400              | -0.87471000 | -2.20724700 |
| H                  | 4.23923100              | -1.04633000 | -1.11481400 |
| Pd                 | -0.00000900             | -0.00010100 | -0.00002800 |
| P                  | -2.32250600             | 0.00040400  | -0.00001100 |
| C                  | -3.14688400             | -1.59649400 | 0.38052000  |
| H                  | -4.23544300             | -1.49093200 | 0.35749500  |
| H                  | -2.84228100             | -2.34699700 | -0.35160300 |
| H                  | -2.83933600             | -1.93866200 | 1.37057200  |
| C                  | -3.15109700             | 1.12650300  | 1.19184300  |
| H                  | -2.85186400             | 2.15650500  | 0.98845300  |
| H                  | -4.23935500             | 1.04559400  | 1.11559000  |
| H                  | -2.84174400             | 0.87329400  | 2.20781600  |
| C                  | -3.15062000             | 0.46769300  | -1.57190700 |
| H                  | -2.84149000             | -0.21710400 | -2.36397400 |
| H                  | -4.23887800             | 0.43047400  | -1.46753600 |
| H                  | -2.85070800             | 1.47844000  | -1.85562300 |
| CH <sub>3</sub> SH | Coordinates (Angstroms) |             |             |
|                    | X                       | Y           | Z           |
| C                  | 0.04832900              | 1.15611700  | 0.00000000  |
| H                  | 1.09320300              | 1.46492400  | 0.00000000  |
| H                  | -0.43658300             | 1.54627300  | 0.89332900  |
| H                  | -0.43658300             | 1.54627300  | -0.89332900 |
| S                  | 0.04832900              | -0.66578600 | 0.00000000  |
| H                  | -1.28328300             | -0.84160400 | 0.00000000  |
| B                  | Coordinates (Angstroms) |             |             |
|                    | X                       | Y           | Z           |
| P                  | 2.32787900              | -0.47074400 | -0.02995900 |
| C                  | 3.17736900              | 0.88492300  | -0.91044700 |
| H                  | 2.85099700              | 1.83458400  | -0.48364600 |
| H                  | 4.26089200              | 0.78787700  | -0.80630700 |
| H                  | 2.91239800              | 0.85962200  | -1.96897700 |
| C                  | 3.12880400              | -1.96989200 | -0.69899400 |
| H                  | 4.21526700              | -1.90958700 | -0.59691400 |
| H                  | 2.75969100              | -2.84452000 | -0.16096800 |
| H                  | 2.86902800              | -2.07782100 | -1.75348500 |
| C                  | 2.99779300              | -0.35327100 | 1.66533300  |
| H                  | 2.65048300              | 0.57809700  | 2.11535300  |
| H                  | 2.63053100              | -1.19069400 | 2.26110400  |
| H                  | 4.09044900              | -0.37046100 | 1.65104200  |
| P                  | -2.32772500             | -0.47095100 | -0.02991900 |
| C                  | -2.99794700             | -0.35276100 | 1.66519900  |
| H                  | -4.09060100             | -0.36987300 | 1.65068900  |
| H                  | -2.63088600             | -1.19000000 | 2.26135200  |
| H                  | -2.65064200             | 0.57875300  | 2.11491000  |
| C                  | -3.17704400             | 0.88426500  | -0.91126100 |

|                     |                         |             |             |
|---------------------|-------------------------|-------------|-------------|
| H                   | -2.91205800             | 0.85820000  | -1.96976800 |
| H                   | -4.26057900             | 0.78739500  | -0.80708300 |
| H                   | -2.85056200             | 1.83415600  | -0.48506500 |
| C                   | -3.12851800             | -1.97041000 | -0.69841200 |
| H                   | -2.75941700             | -2.84480600 | -0.15999900 |
| H                   | -4.21499200             | -1.91012300 | -0.59645600 |
| H                   | -2.86865100             | -2.07874700 | -1.75284000 |
| Pd                  | 0.00007700              | -0.35725600 | -0.05659900 |
| H                   | 0.00022300              | -1.83789800 | -0.56191900 |
| S                   | -0.00045300             | 1.99261400  | 0.73300900  |
| C                   | -0.00031700             | 2.87432800  | -0.87202300 |
| H                   | -0.88405500             | 2.62236100  | -1.46213800 |
| H                   | -0.00293400             | 3.95155100  | -0.69178300 |
| H                   | 0.88598400              | 2.62622200  | -1.45990900 |
| PhCHCH <sub>2</sub> | Coordinates (Angstroms) |             |             |
|                     | X                       | Y           | Z           |
| C                   | -1.77599700             | -1.04173100 | 0.00000100  |
| C                   | -0.40567900             | -1.27849100 | 0.00000000  |
| C                   | 0.51052400              | -0.22159400 | -0.00000100 |
| C                   | 0.01112300              | 1.08729100  | -0.00000200 |
| C                   | -1.35573500             | 1.32576900  | 0.00000000  |
| C                   | -2.25646700             | 0.26256100  | 0.00000100  |
| H                   | -2.46780400             | -1.87666400 | 0.00000300  |
| H                   | -0.03683500             | -2.29961800 | 0.00000000  |
| H                   | 0.69327600              | 1.93008600  | -0.00000300 |
| H                   | -1.72271700             | 2.34623500  | -0.00000100 |
| H                   | -3.32395500             | 0.45198500  | 0.00000200  |
| C                   | 1.95331200              | -0.53184000 | -0.00000200 |
| H                   | 2.18832100              | -1.59438500 | -0.00000800 |
| C                   | 2.96316800              | 0.33793000  | 0.00000300  |
| H                   | 2.81451100              | 1.41294600  | 0.00000900  |
| H                   | 3.98970700              | -0.00996100 | 0.00000100  |
| C                   | Coordinates (Angstroms) |             |             |
|                     | X                       | Y           | Z           |
| P                   | -2.16626800             | -1.61666500 | 0.00272600  |
| C                   | -3.82244800             | -1.19732100 | 0.65037600  |
| H                   | -4.20604900             | -0.33329200 | 0.10813300  |
| H                   | -4.50375400             | -2.04234900 | 0.52496100  |
| H                   | -3.74546800             | -0.95118400 | 1.71113300  |
| C                   | -1.83320100             | -3.20907800 | 0.84615200  |
| H                   | -2.70328400             | -3.86332600 | 0.75398800  |
| H                   | -0.97187100             | -3.70580300 | 0.39605900  |
| H                   | -1.62661700             | -3.03631100 | 1.90431200  |
| C                   | -2.49352600             | -2.15504900 | -1.71257400 |
| H                   | -2.81328700             | -1.29205600 | -2.29695800 |
| H                   | -1.57553000             | -2.55758600 | -2.14522000 |
| H                   | -3.26873200             | -2.92498500 | -1.73321000 |
| P                   | 0.89015400              | 2.00339900  | 0.10970100  |
| C                   | 1.94967300              | 1.95855100  | -1.38153600 |
| H                   | 2.57537200              | 2.85321400  | -1.43409900 |
| H                   | 2.58263900              | 1.06990800  | -1.35343400 |
| H                   | 1.31419000              | 1.90819900  | -2.26802900 |

|                 |                         |             |             |
|-----------------|-------------------------|-------------|-------------|
| C               | 0.12659900              | 3.66247300  | 0.00128000  |
| H               | -0.38324000             | 3.88978100  | 0.93927900  |
| H               | 0.90088000              | 4.41418600  | -0.17114600 |
| H               | -0.59873200             | 3.67753500  | -0.81177800 |
| C               | 2.10007800              | 2.30456000  | 1.45035200  |
| H               | 2.79009900              | 1.46882200  | 1.54221100  |
| H               | 2.66936500              | 3.21029300  | 1.22617000  |
| H               | 1.57371600              | 2.44290200  | 2.39650700  |
| Pd              | -0.60332500             | 0.14505000  | 0.11973700  |
| S               | -2.27321100             | 1.44688900  | -1.17448300 |
| C               | -3.16504100             | 2.36677300  | 0.13017400  |
| H               | -2.52900300             | 3.12236100  | 0.59405000  |
| H               | -4.02878600             | 2.86801100  | -0.31212300 |
| H               | -3.52168400             | 1.69262200  | 0.91149700  |
| C               | 0.78022100              | -1.14560100 | 1.08960000  |
| H               | 0.32696200              | -2.12905200 | 0.98646200  |
| C               | 2.05640500              | -1.21166700 | 0.31157100  |
| C               | 3.30785200              | -0.89390500 | 0.84888900  |
| C               | 2.02465900              | -1.64318000 | -1.02628100 |
| C               | 4.46753300              | -0.95800500 | 0.07749000  |
| H               | 3.38959700              | -0.60053500 | 1.88952000  |
| C               | 3.17539600              | -1.71846500 | -1.79430000 |
| H               | 1.06662600              | -1.90287400 | -1.46763600 |
| C               | 4.40984600              | -1.36326600 | -1.24913800 |
| H               | 5.42086600              | -0.69564700 | 0.52439800  |
| H               | 3.11212000              | -2.04828000 | -2.82605100 |
| H               | 5.31116400              | -1.41151400 | -1.84986800 |
| C               | 0.90377200              | -0.85863500 | 2.57963000  |
| H               | 1.55799300              | -1.58785000 | 3.07881300  |
| H               | 1.30203600              | 0.13504300  | 2.79396600  |
| H               | -0.07844500             | -0.92287900 | 3.05540600  |
| CO <sub>2</sub> | Coordinates (Angstroms) |             |             |
|                 | X                       | Y           | Z           |
| C               | 0.00000000              | 0.00000000  | 0.00000000  |
| O               | 0.00000000              | 0.00000000  | 1.15651600  |
| O               | 0.00000000              | 0.00000000  | -1.15651600 |
| D               | Coordinates (Angstroms) |             |             |
|                 | X                       | Y           | Z           |
| P               | -2.27252700             | -1.62952300 | -0.24574200 |
| C               | -4.03561700             | -1.30312300 | 0.07871300  |
| H               | -4.36482100             | -0.48033000 | -0.55678400 |
| H               | -4.63201000             | -2.19393900 | -0.13129900 |
| H               | -4.16281600             | -1.02060400 | 1.12518100  |
| C               | -1.90978600             | -3.09659600 | 0.77766600  |
| H               | -2.64658000             | -3.88015700 | 0.58566000  |
| H               | -0.91573700             | -3.48128500 | 0.54706600  |
| H               | -1.93777000             | -2.81785700 | 1.83162900  |
| C               | -2.22281700             | -2.25796500 | -1.95611400 |
| H               | -2.50531500             | -1.45391300 | -2.63674600 |
| H               | -1.20900500             | -2.58509600 | -2.19481700 |
| H               | -2.91074300             | -3.09833300 | -2.07398900 |
| P               | 0.28796000              | 2.18413400  | 0.79570100  |



|                    |                         |             |             |
|--------------------|-------------------------|-------------|-------------|
| C                  | 0.51051900              | 3.49426600  | -0.44906500 |
| H                  | 1.01336000              | 4.35671800  | -0.00549400 |
| H                  | 1.11500900              | 3.10077900  | -1.26851600 |
| H                  | -0.45875700             | 3.79331700  | -0.84907200 |
| C                  | -0.55380000             | 3.00607300  | 2.19432700  |
| H                  | -0.57876500             | 2.31579900  | 3.03964700  |
| H                  | -0.01860100             | 3.91338900  | 2.48480200  |
| H                  | -1.57922100             | 3.25991900  | 1.92431800  |
| C                  | 1.96837800              | 1.90074600  | 1.43737100  |
| H                  | 2.62110700              | 1.58330600  | 0.62428400  |
| H                  | 2.35960100              | 2.82007000  | 1.88007500  |
| H                  | 1.93278600              | 1.11116600  | 2.18847200  |
| Pd                 | -0.89504400             | 0.22388100  | 0.19433100  |
| S                  | -2.14905900             | 1.34939000  | -1.43177800 |
| C                  | -3.25706100             | 2.43551100  | -0.47329300 |
| H                  | -2.71728200             | 3.26559500  | -0.01418400 |
| H                  | -3.99281000             | 2.84634000  | -1.16739300 |
| H                  | -3.78276500             | 1.87624100  | 0.30185300  |
| C                  | 1.53556600              | -2.02732200 | -0.04604100 |
| H                  | 0.60704600              | -1.96333000 | -0.61849700 |
| C                  | 2.47373200              | -0.97714500 | -0.61151300 |
| C                  | 3.76338300              | -0.82317100 | -0.09830600 |
| C                  | 2.06546400              | -0.14169400 | -1.65124600 |
| C                  | 4.61872900              | 0.14764800  | -0.60491100 |
| H                  | 4.09350000              | -1.45785800 | 0.71711200  |
| C                  | 2.91845400              | 0.83349000  | -2.15996300 |
| H                  | 1.06823900              | -0.25220800 | -2.06586300 |
| C                  | 4.19753300              | 0.98345200  | -1.63606500 |
| H                  | 5.61339100              | 0.25927400  | -0.18755100 |
| H                  | 2.58109300              | 1.47619400  | -2.96588800 |
| H                  | 4.86326900              | 1.74430900  | -2.02768900 |
| C                  | 2.10260000              | -3.43941600 | -0.18846000 |
| H                  | 2.29980600              | -3.65744700 | -1.24121000 |
| H                  | 3.03327600              | -3.54784700 | 0.37055100  |
| H                  | 1.39733300              | -4.18356000 | 0.19094700  |
| C                  | 1.19980100              | -1.67616800 | 1.42082100  |
| O                  | 0.26404200              | -0.82589300 | 1.63272500  |
| O                  | 1.84710400              | -2.20011700 | 2.33099000  |
| <hr/>              |                         |             |             |
| PhSiH <sub>3</sub> | Coordinates (Angstroms) |             |             |
|                    | X                       | Y           | Z           |
| C                  | -0.01138400             | -1.64634500 | 1.20370900  |
| C                  | -0.01138400             | -0.25502600 | 1.20149700  |
| C                  | -0.00827000             | 0.46501200  | 0.00000000  |
| C                  | -0.01138400             | -0.25502600 | -1.20149700 |
| C                  | -0.01138400             | -1.64634500 | -1.20370900 |
| C                  | -0.01042500             | -2.34391600 | 0.00000000  |
| H                  | -0.01511300             | -2.18518000 | 2.14482000  |
| H                  | -0.01753700             | 0.27194700  | 2.15114400  |
| H                  | -0.01753700             | 0.27194700  | -2.15114400 |
| H                  | -0.01511300             | -2.18518000 | -2.14482000 |
| H                  | -0.01239800             | -3.42840900 | 0.00000000  |
| Si                 | 0.02547400              | 2.34179800  | 0.00000000  |

|    |                         |             |             |
|----|-------------------------|-------------|-------------|
| H  | 1.42169000              | 2.85243300  | 0.00000000  |
| H  | -0.65762200             | 2.85357100  | -1.21507700 |
| H  | -0.65762200             | 2.85357100  | 1.21507700  |
| E  | Coordinates (Angstroms) |             |             |
|    | X                       | Y           | Z           |
| P  | 0.13008700              | -2.01982500 | -1.31053100 |
| C  | 0.41738300              | -3.78069600 | -0.94039100 |
| H  | -0.53063700             | -4.31539800 | -1.00727400 |
| H  | 1.13236200              | -4.20485400 | -1.64926800 |
| H  | 0.81196500              | -3.87644000 | 0.07264400  |
| C  | 1.80552000              | -1.29873200 | -1.28319000 |
| H  | 2.47270500              | -1.86569400 | -1.93662500 |
| H  | 1.77335500              | -0.26100600 | -1.61635300 |
| H  | 2.18508900              | -1.31914900 | -0.26075700 |
| C  | -0.34152100             | -1.98735500 | -3.07098500 |
| H  | -1.31502400             | -2.46561700 | -3.18593600 |
| H  | -0.41276200             | -0.95228200 | -3.41037500 |
| H  | 0.40045900              | -2.51502900 | -3.67454100 |
| P  | -2.86122100             | -0.11713500 | 1.79453400  |
| C  | -4.65671300             | -0.29358900 | 1.54798800  |
| H  | -5.19660000             | 0.12434900  | 2.40080200  |
| H  | -4.94038900             | 0.24031000  | 0.63909400  |
| H  | -4.91401200             | -1.34572800 | 1.42524000  |
| C  | -2.53237500             | -0.91560200 | 3.40516300  |
| H  | -1.49343300             | -0.72777200 | 3.68231000  |
| H  | -3.19216600             | -0.51141100 | 4.17674000  |
| H  | -2.68169100             | -1.99299400 | 3.32875000  |
| C  | -2.65093100             | 1.65452800  | 2.15902500  |
| H  | -3.01439900             | 2.24450400  | 1.31770700  |
| H  | -3.21361900             | 1.91837300  | 3.05790100  |
| H  | -1.59197700             | 1.86686800  | 2.30806700  |
| Pd | -1.38395400             | -0.98068000 | 0.15665400  |
| S  | -2.93390300             | -2.58475800 | -0.55833400 |
| C  | -3.01063700             | -3.77131800 | 0.82391500  |
| H  | -3.48377800             | -3.33711000 | 1.70616400  |
| H  | -3.61208500             | -4.62070500 | 0.49414200  |
| H  | -2.01567900             | -4.13046000 | 1.09069300  |
| C  | -0.23554400             | 1.80231700  | -1.25376600 |
| H  | -0.35772400             | 0.81973100  | -1.71477200 |
| C  | -1.61946400             | 2.41689800  | -1.15310300 |
| C  | -1.79231700             | 3.70853700  | -0.65086500 |
| C  | -2.74834000             | 1.70037100  | -1.55077900 |
| C  | -3.06087200             | 4.26435200  | -0.53921300 |
| H  | -0.92640100             | 4.27514300  | -0.32614000 |
| C  | -4.02112900             | 2.25148800  | -1.43579000 |
| H  | -2.63281500             | 0.69919200  | -1.95389000 |
| C  | -4.18217400             | 3.53507000  | -0.92673500 |
| H  | -3.17680000             | 5.26534800  | -0.13844600 |
| H  | -4.88635800             | 1.67630300  | -1.74721300 |
| H  | -5.17235700             | 3.96662200  | -0.83329200 |
| C  | 0.70602600              | 2.63706700  | -2.12085200 |
| H  | 0.27747400              | 2.77016800  | -3.11748800 |

|    |                         |             |             |
|----|-------------------------|-------------|-------------|
| H  | 0.87797700              | 3.61978000  | -1.67915400 |
| H  | 1.67699100              | 2.14576200  | -2.22450500 |
| C  | 0.32529600              | 1.58098200  | 0.16908600  |
| O  | 0.01288000              | 0.49475000  | 0.77334600  |
| O  | 1.02925000              | 2.45536100  | 0.68166500  |
| C  | 7.17290700              | -1.26500500 | -0.17528200 |
| C  | 5.91210800              | -0.68304400 | -0.10950400 |
| C  | 5.71739600              | 0.55820900  | 0.51212400  |
| C  | 6.83266600              | 1.19697200  | 1.06597100  |
| C  | 8.09793900              | 0.61869100  | 1.00333200  |
| C  | 8.26950900              | -0.61365900 | 0.38315700  |
| H  | 7.30158200              | -2.22613300 | -0.66100400 |
| H  | 5.06948400              | -1.20728500 | -0.55263600 |
| H  | 6.71708500              | 2.16027800  | 1.55384200  |
| H  | 8.94908900              | 1.13015900  | 1.43956200  |
| H  | 9.25365000              | -1.06634800 | 0.33287400  |
| Si | 3.99905900              | 1.32149800  | 0.60448100  |
| H  | 3.11673100              | 0.44203700  | 1.40708700  |
| H  | 4.11393900              | 2.65980100  | 1.23248700  |
| H  | 3.44986300              | 1.43773900  | -0.76789700 |
| F  | Coordinates (Angstroms) |             |             |
|    | X                       | Y           | Z           |
| C  | 0.26033800              | 1.03891600  | -0.72759000 |
| H  | 0.44735800              | 0.77923400  | -1.77330000 |
| C  | -1.01391100             | 0.32834300  | -0.29476100 |
| C  | -1.50144000             | 0.46319900  | 1.00649000  |
| C  | -1.72032600             | -0.46131200 | -1.20008800 |
| C  | -2.67329600             | -0.17705600 | 1.39101700  |
| H  | -0.95976700             | 1.06824700  | 1.72592700  |
| C  | -2.89483600             | -1.10167500 | -0.81756500 |
| H  | -1.34927500             | -0.57723500 | -2.21336800 |
| C  | -3.37492500             | -0.96075400 | 0.47945200  |
| H  | -3.04034200             | -0.06310400 | 2.40495600  |
| H  | -3.43449300             | -1.71039400 | -1.53443900 |
| H  | -4.28998600             | -1.45864100 | 0.77962000  |
| C  | 0.15999900              | 2.56035100  | -0.60081000 |
| H  | -0.67794700             | 2.92152100  | -1.20010100 |
| H  | -0.00067100             | 2.85862600  | 0.43638200  |
| H  | 1.07483800              | 3.03901300  | -0.95725600 |
| C  | 1.42584200              | 0.49693000  | 0.09619100  |
| O  | 1.80072000              | 0.98151700  | 1.13559300  |
| S  | 2.16708500              | -0.96042000 | -0.60090200 |
| C  | 3.37995800              | -1.35434600 | 0.68237700  |
| H  | 2.87949500              | -1.52685600 | 1.63372300  |
| H  | 3.88386200              | -2.26474200 | 0.35982900  |
| H  | 4.10339900              | -0.54666600 | 0.77943800  |

## 6. Competition reactions<sup>a</sup>

Competition reactions between different substrates were carried out (**Scheme S4**). Interestingly, the carbonylation of styrene in the presence of both *O*- and *S*-nucleophiles exclusively produced thioester **3a**, with no loss in activity (86% **Scheme S4**, eq A). This might indicate that the stronger Pd-S interaction of *n*BuSH than Pd-O interaction of *n*BuOH is

critical to give the product. When using 1:1 mixture of styrene (**1a**) and  $\beta$ -methylstyrene (**1ak**), both products **3a** and **3ak** can be detected, indicating the impact of steric effect of internal alkenes (97% vs 49% **Scheme S4**, eq **B**). Competition reaction of primary and secondary thiols was tested, and similar yields of the corresponding thioesters were formed (57% vs 53% **Scheme S4**, eq **C**). Steric hindrance effect of thiols is minor. In the competition reaction of styrene with alkyl thiol and aryl thiol, the yield of thioester from alkyl thiol **2w** was much higher than the yield from aryl thiol **2aa**, probably due to the weaker S-H polarity and Pd-S interaction of arylthiol (55% vs 23% **Scheme S4**, eq **D**).

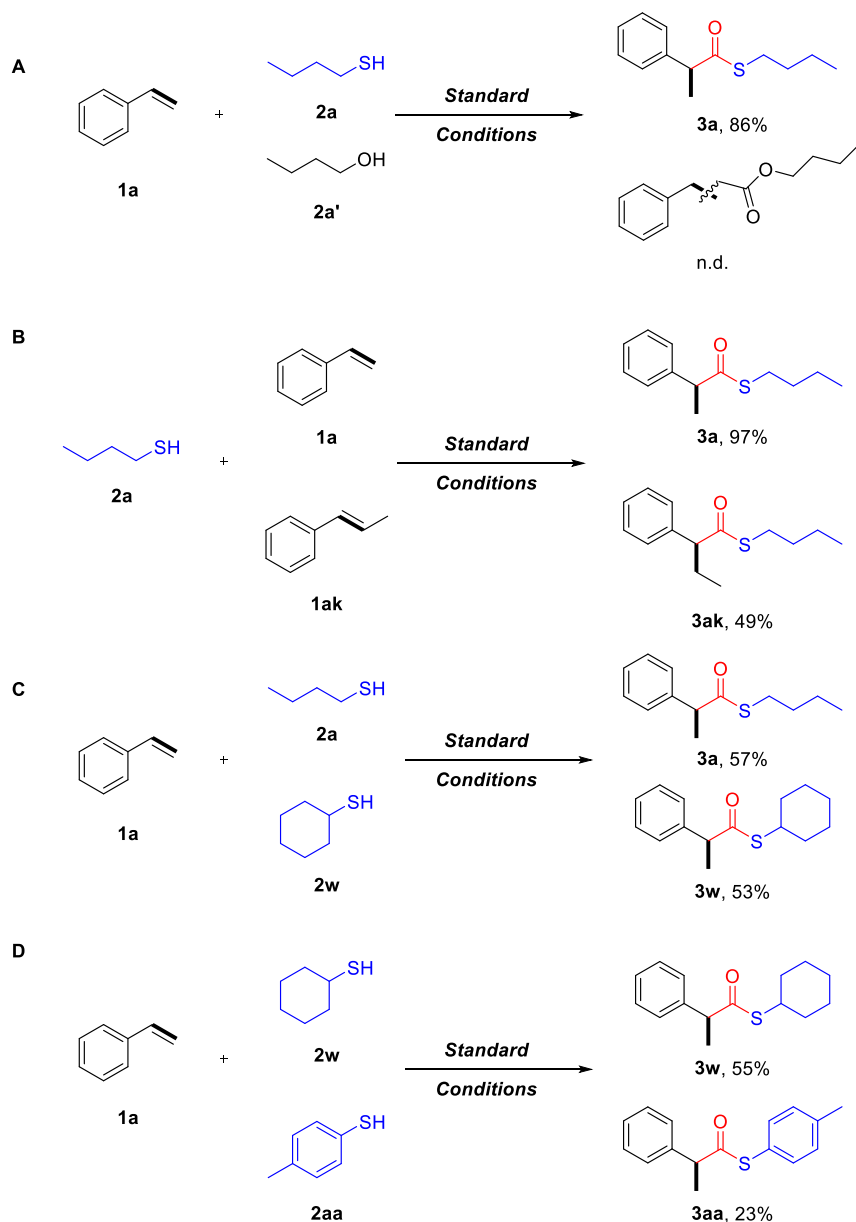

**Scheme S4.** "Standard conditions: **1a/1ak** (0.2 mmol), **2a/2a'/2w/2aa** (1.7 equiv.), PdCl<sub>2</sub>(PCy<sub>3</sub>)<sub>2</sub> (5 mol%), **L1** (10.0 mol%), PhSiH<sub>3</sub> (1.8 equiv.), CO<sub>2</sub> (20 bar), NMP (0.5 mL), and stirred at 80 °C for 18 h. Yields were determined by quant. NMR spectroscopy using 1,1,2,2-tetrachloroethane as the internal standard.

## 7. Procedures for gram-scale experiment

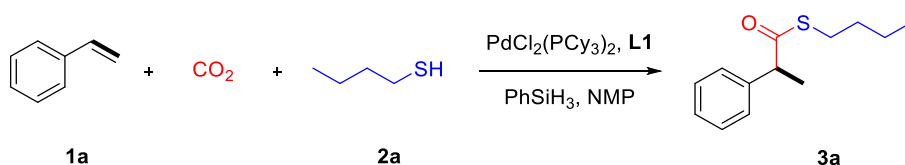

**Experimental Procedure for product 3a (5 mmol scale):** The substrate **1a** (5 mmol), thiol **2a** (1.7 equiv.), palladium catalyst (5 mol%), ligand **L1** (10 mol%), phenylsilane (1.8 equiv.), and a stirring bar were added to a 35 mL autoclave, followed by addition of solvent *N*-methylpyrrolidone (NMP) (6 mL). The autoclave was sealed and purged three times with CO<sub>2</sub> gas, then pressurized to 20 atm. At last, the autoclave was heated at 80 °C for 18 h with stirring. After the reaction finished, the autoclave was cooled to room temperature and the pressure was carefully released. The solution was diluted with water and extracted with ethyl acetate (50 mL). The combined organic extracts were washed with brine, dried with anhydrous Na<sub>2</sub>SO<sub>4</sub>, filtered and concentrated under vacuum. The residue was purified by column chromatography on silica gel (200:1 petroleum ether:ethyl acetate, visualized with UV) to afford product **3a** (936 mg, 84% yield, b/l > 99:1).

## 8. General procedure for the preparation of Estrone Derivatives

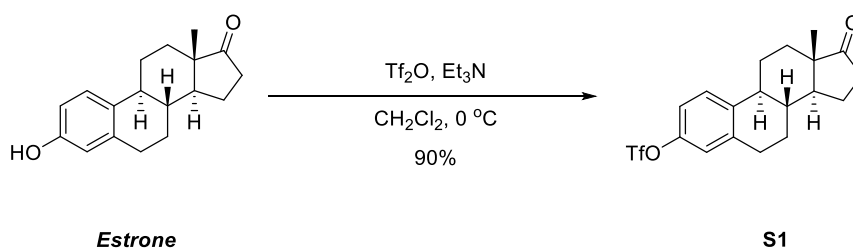

To estrone (1.00 g, 3.70 mmol, 1.00 equiv.) in CH<sub>2</sub>Cl<sub>2</sub> (19 mL) at 0 °C was added triethylamine (1.03 mL, 7.40 mmol, 2.00 equiv.) and trifluoromethanesulfonic anhydride (684 μL, 4.07 mmol, 1.10 equiv.). The reaction mixture was stirred at 0 °C for 20 min before the addition of saturated aqueous NaHCO<sub>3</sub> (20 mL). The phases were separated and the aqueous phase was extracted with CH<sub>2</sub>Cl<sub>2</sub> (2 × 20 mL). The combined organic phases are washed with brine (40 mL) and dried (Na<sub>2</sub>SO<sub>4</sub>). The filtrate was concentrated in vacuo and the residue was purified by chromatography on silica gel eluting with hexanes/EtOAc 4:1 (v/v) to afford 1.30 g of the title compound **S1**<sup>10</sup> as a colorless oil (1.34 g, 90% yield).

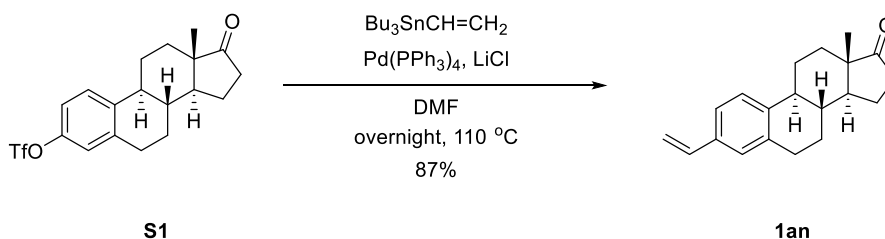

3-Vinyl-estrone **1an**<sup>10</sup> was synthesized by using 3-(Trifluoromethanesulfonyl)estrone **S1** (600 mg, 1.49 mmol, 1 equiv.), vinyltributylstannane (436 μL, 1.49 mmol, 1 equiv.), Pd(PPh<sub>3</sub>)<sub>4</sub> (35 mg, 0.03 mmol, 0.02 equiv.), LiCl (316 mg, 7.45 mmol, 5 equiv.), and DMF (23 mL, 0.067M solution). The crude product was purified by flash column chromatography using gradient elution (500 mL of 100% hexanes, 200 mL of 5% ethyl acetate in hexanes, and 300 mL of 8% ethyl acetate in hexanes) to obtain 363 mg (87%) white solid.

## 9. General procedure for the preparation of naproxen (**3am'**)<sup>11</sup>

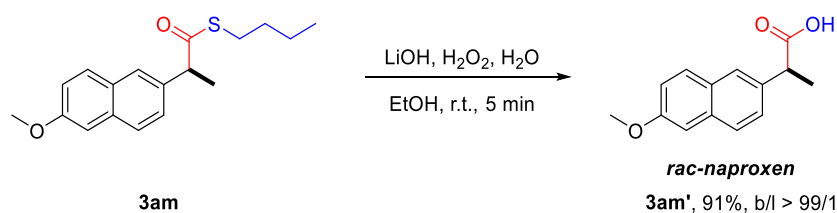

A solution of **3am** (0.2 mmol) in EtOH (2 mL), was added a previously prepared solution of LiOH in H<sub>2</sub>O<sub>2</sub> (LiOH 0.92 g, 38.4 mmol; 30% H<sub>2</sub>O<sub>2</sub> 6.2 mL; H<sub>2</sub>O 11.5 mL). The mixture was stirred at rt for 3 min, then quenched with dil. HCl. Afterwards extraction with CH<sub>2</sub>Cl<sub>2</sub> and usual work up are performed. The residue purified by column chromatography with petro ether/ethyl acetate (100:1 to 10:1) as the eluent to get *rac*-naproxen **3am'** (41.9 mg, 91% yield) as a white solid.

## 10. Asymmetric thiocarbonylation reaction<sup>a</sup>

To a 4 mL sealing tube in a nitrogen-filled glovebox, the alkene (0.2 mmol), thiol (1.7 equiv, 0.34 mmol), palladium-catalyst (5.0 mmol%, 0.01 mmol), **L12** (10.0 mmol%, 0.02 mmol), PhSiH<sub>3</sub> (1.8 equiv, 0.36 mmol), ZnI<sub>2</sub> (20.0 mmol%, 0.04 mmol) were added followed by addition of solvent *N*-methylpyrrolidone (NMP) (0.5 mL). Then the tube was sealed, taken out of the glovebox and placed into the autoclave. The autoclave was sealed and purged three times with CO<sub>2</sub> gas, then pressurized to 20 atm. Finally, the autoclave was heated at 80 °C for 36 h with stirring. After the reaction finished, the autoclave was cooled to room temperature and the pressure was carefully released. The results were measured by GC and HPLC analysis.

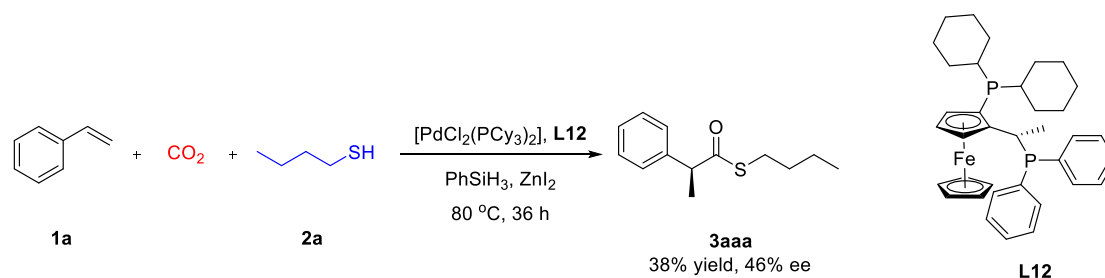

<sup>a</sup>Reaction conditions: styrene (0.2 mmol), butyl thiol (1.7 equiv.), PdCl<sub>2</sub>(PCy<sub>3</sub>)<sub>2</sub> (5.0 mol%), **L12** (10.0 mol%), PhSiH<sub>3</sub> (1.8 equiv.), ZnI<sub>2</sub> (20.0 mol%), CO<sub>2</sub> (20 bar), NMP (0.5 mL), and stirred at 80 °C for 36 h. Yield of **3aaa** was determined by GC analysis using dodecane as the internal standard. Enantiomeric excess was determined by chiral HPLC analysis.

## 11. Characterization spectra data of compounds.

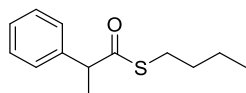

### *S*-butyl 2-phenylpropanethioate (**3a**)<sup>6</sup>

Yellow liquid (Yield = 90%; 40.0 mg); <sup>1</sup>H NMR (400 MHz, CDCl<sub>3</sub>): δ = 7.26 (d, *J* = 4.0 Hz, 4H), 7.22 (t, *J* = 4.0 Hz, 1H), 3.83 (q, *J* = 8.0 Hz, 1H), 2.77 (m, 2H), 1.48 (d, *J* = 8.0 Hz, 3H), 1.45 (t, *J* = 8.0 Hz, 2H), 1.28 (m, 2H), 0.83 (t, *J* = 8.0 Hz, 3H). <sup>13</sup>C NMR (100 MHz, CDCl<sub>3</sub>): δ = 201.2, 140.1, 128.7, 127.9, 127.4, 54.3, 31.5, 28.8, 22.0, 18.5, 13.6.

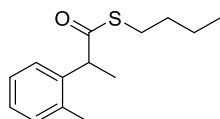

### *S*-butyl 2-(*o*-tolyl) propanethioate (**3b**)

Yellow liquid (Yield = 89%; 42.0 mg); <sup>1</sup>H NMR (400 MHz, CDCl<sub>3</sub>): δ = 7.36 (t, *J* = 8.0 Hz, 1H), 7.27 (d, *J* = 8.0 Hz, 3H), 4.19 (q, *J* = 8.0 Hz, 1H), 2.91 (m, 2H), 2.46 (s, 3H), 1.60 (d, *J* = 4.0 Hz, 3H), 1.57 (t, *J* = 8.0 Hz, 2H), 1.43 (m, 2H), 0.96 (t, *J* = 8.0 Hz, 3H). <sup>13</sup>C NMR (100 MHz, CDCl<sub>3</sub>): δ = 201.7, 138.4, 136.2, 130.5, 127.3, 127.2, 126.4, 50.1, 31.5, 28.8, 22.0, 19.9, 18.1, 13.6. HRMS (ESI) [C<sub>14</sub>H<sub>20</sub>OS+Na]<sup>+</sup> calculated mass 259.1127, measured mass 259.1127.

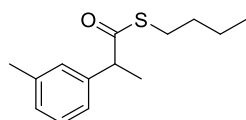

### *S*-butyl 2-(*m*-tolyl) propanethioate (**3c**)

Yellow liquid (Yield = 90%; 42.5 mg);  $^1\text{H NMR}$  (400 MHz,  $\text{CDCl}_3$ ):  $\delta$  = 7.25 - 7.19 (m, 1H), 7.12 (s, 1H), 7.09 (d,  $J$  = 8.0 Hz, 2H), 3.85 (q,  $J$  = 8.0 Hz, 1H), 2.89 - 2.78 (m, 2H), 2.35 (s, 3H), 1.53 (s, 3H), 1.51 (d,  $J$  = 4.0 Hz, 2H), 1.35 (q,  $J$  = 8.0 Hz, 2H), 0.89 (t,  $J$  = 8.0 Hz, 3H).  $^{13}\text{C NMR}$  (100 MHz,  $\text{CDCl}_3$ ):  $\delta$  = 201.4, 140.0, 138.3, 128.6, 128.5, 128.2, 125.0, 54.3, 31.5, 28.8, 22.0, 21.4, 18.5, 13.6. HRMS (ESI)  $[\text{C}_{14}\text{H}_{20}\text{OS}+\text{Na}]^+$  calculated mass 259.1127, measured mass 259.1128.

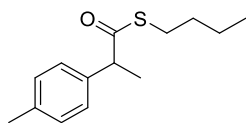

**S-butyl 2-(*p*-tolyl) propanethioate (3d)**

Yellow liquid (Yield = 94%; 44.4 mg);  $^1\text{H NMR}$  (400 MHz,  $\text{CDCl}_3$ ):  $\delta$  = 7.21 (d,  $J$  = 8.0 Hz, 2H), 7.15 (d,  $J$  = 8.0 Hz, 2H), 3.85 (q,  $J$  = 8.0 Hz, 1H), 2.88 - 2.79 (m, 2H), 2.34 (s, 3H), 1.52 (d,  $J$  = 8.0 Hz, 3H), 1.49 (t,  $J$  = 8.0 Hz, 2H), 1.39 - 1.32 (m, 2H), 0.89 (t,  $J$  = 8.0 Hz, 3H).  $^{13}\text{C NMR}$  (100 MHz,  $\text{CDCl}_3$ ):  $\delta$  = 201.5, 137.1, 129.4, 128.4, 127.8, 53.9, 31.5, 28.8, 22.0, 21.1, 18.5, 13.6. HRMS (ESI)  $[\text{C}_{14}\text{H}_{20}\text{OS}+\text{Na}]^+$  calculated mass 259.1127, measured mass 259.1133.

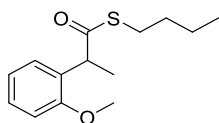

**S-butyl 2-(2-methoxyphenyl) propanethioate (3e)**

Yellow liquid (Yield = 81%; 40.8 mg);  $^1\text{H NMR}$  (400 MHz,  $\text{CDCl}_3$ ):  $\delta$  = 7.25 (d,  $J$  = 8.0 Hz, 2H), 6.95 (t,  $J$  = 8.0 Hz, 1H), 6.87 (d,  $J$  = 8.0 Hz, 1H), 4.25 (q,  $J$  = 8.0 Hz, 1H), 3.82 (s, 3H), 2.81 (t,  $J$  = 8.0 Hz, 2H), 1.53 - 1.48 (m, 3H), 1.47 (s, 2H), 1.38 - 1.32 (m, 2H), 0.88 (t,  $J$  = 8.0 Hz, 3H).  $^{13}\text{C NMR}$  (100 MHz,  $\text{CDCl}_3$ ):  $\delta$  = 202.2, 157.1, 128.7, 128.5, 128.4, 120.7, 110.7, 55.5, 47.3, 31.6, 28.6, 21.9, 17.2, 13.6. HRMS (ESI)  $[\text{C}_{14}\text{H}_{20}\text{O}_2\text{S}+\text{Na}]^+$  calculated mass 275.1076, measured mass 275.1079.

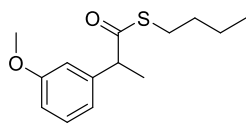

**S-butyl 2-(3-methoxyphenyl) propanethioate (3f)**

Yellow liquid (Yield = 86%; 43.3 mg);  $^1\text{H NMR}$  (400 MHz,  $\text{CDCl}_3$ ):  $\delta$  = 7.26 (t,  $J$  = 8.0 Hz, 1H), 6.91 (d,  $J$  = 4.0 Hz, 1H), 6.87 (s, 1H), 6.83 (d,  $J$  = 8.0 Hz, 1H), 3.87 (q,  $J$  = 8.0 Hz, 1H), 3.82 (s, 3H), 2.90 - 2.81 (m, 2H), 1.55 (d,  $J$  = 8.0 Hz, 3H), 1.52 (t,  $J$  = 8.0 Hz, 2H), 1.38 (t,  $J$  = 8.0 Hz, 2H), 0.90 (t,  $J$  = 8.0 Hz, 3H).  $^{13}\text{C NMR}$  (100 MHz,  $\text{CDCl}_3$ ):  $\delta$  = 201.1, 159.8, 141.6, 129.6, 120.3, 113.7, 112.7, 55.2, 54.3, 31.5, 28.8, 22.0, 18.4, 13.5. HRMS (ESI)  $[\text{C}_{14}\text{H}_{20}\text{O}_2\text{S}+\text{Na}]^+$  calculated mass 275.1076, measured mass 275.1086.

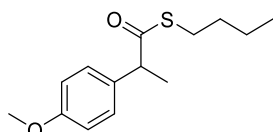

**S-butyl 2-(4-methoxyphenyl) propanethioate (3g)**

Yellow liquid (Yield = 87%; 43.8 mg);  $^1\text{H NMR}$  (400 MHz,  $\text{CDCl}_3$ ):  $\delta$  = 7.22 (d,  $J$  = 12.0 Hz, 2H), 6.86 (d,  $J$  = 12.0 Hz, 2H), 3.82 (q,  $J$  = 8.0 Hz, 1H), 3.79 (s, 3H), 2.81 (m, 2H), 1.50 (d,  $J$  = 8.0 Hz, 3H), 1.37 - 1.32 (m, 2H), 1.28 (t,  $J$  = 8.0 Hz, 2H), 0.88 (t,  $J$  = 8.0 Hz, 3H).  $^{13}\text{C NMR}$  (100 MHz,  $\text{CDCl}_3$ ):  $\delta$  = 201.7, 159.0, 132.1, 129.0, 114.0, 55.2, 53.4, 31.5, 28.8, 22.0, 18.5, 13.5. HRMS (ESI)  $[\text{C}_{14}\text{H}_{20}\text{O}_2\text{S}+\text{Na}]^+$  calculated mass 275.1076, measured mass 275.1083.

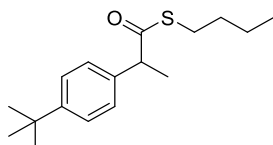

**S-butyl 2-(4-(*tert*-butyl) phenyl) propanethioate (3h)**

Yellow liquid (Yield = 94%; 52.3 mg);  $^1\text{H NMR}$  (400 MHz,  $\text{CDCl}_3$ ):  $\delta$  = 7.27 (d,  $J$  = 8.0 Hz, 2H), 7.16 (d,  $J$  = 8.0 Hz, 2H), 3.79 (q,  $J$  = 8.0 Hz, 1H), 2.80 - 2.71 (m, 2H), 1.45 (d,  $J$  = 8.0 Hz, 3H), 1.42 (t,  $J$  = 8.0 Hz, 2H), 1.31 - 1.25 (m, 2H), 1.24 (s,

9H), 0.81 (t,  $J = 8.0$  Hz, 3H).  $^{13}\text{C}$  NMR (100 MHz,  $\text{CDCl}_3$ ):  $\delta = 201.5, 150.2, 136.9, 127.5, 125.6, 53.8, 34.5, 31.5, 31.4, 28.8, 22.0, 18.5, 13.6$ . HRMS (ESI)  $[\text{C}_{17}\text{H}_{26}\text{OS}+\text{Na}]^+$  calculated mass 301.1597, measured mass 301.1601.

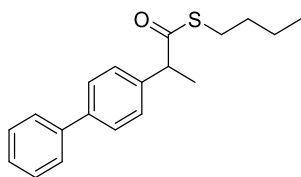

### **S-butyl 2-((1,1'-biphenyl)-4-yl) propanethioate (3i)**

Yellow liquid (Yield = 92%; 54.6 mg);  $^1\text{H}$  NMR (400 MHz,  $\text{CDCl}_3$ ):  $\delta = 7.58$  (t,  $J = 8.0$  Hz, 4H), 7.45 (d,  $J = 8.0$  Hz, 1H), 7.41 (d,  $J = 4.0$  Hz, 2H), 7.38 (d,  $J = 12.0$  Hz, 1H), 7.34 (d,  $J = 8.0$  Hz, 1H), 3.94 (q,  $J = 8.0$  Hz, 1H), 2.94 - 2.78 (m, 2H), 1.58 (d,  $J = 8.0$  Hz, 3H), 1.52 (t,  $J = 8.0$  Hz, 2H), 1.40 - 1.34 (m, 2H), 0.90 (t,  $J = 8.0$  Hz, 3H).  $^{13}\text{C}$  NMR (100 MHz,  $\text{CDCl}_3$ ):  $\delta = 201.3, 140.8, 140.4, 139.1, 128.8, 128.3, 127.4, 127.3, 127.1, 54.0, 31.5, 28.9, 22.0, 18.5, 13.6$ . HRMS (ESI)  $[\text{C}_{19}\text{H}_{22}\text{OS}+\text{Na}]^+$  calculated mass 321.1284, measured mass 321.1280.

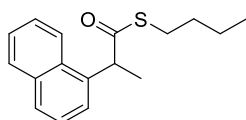

### **S-butyl 2-(naphthalen-1-yl) propanethioate (3j)**

Yellow liquid (Yield = 93%; 50.6 mg);  $^1\text{H}$  NMR (400 MHz,  $\text{CDCl}_3$ ):  $\delta = 8.06$  (d,  $J = 8.0$  Hz, 1H), 7.88 (d,  $J = 8.0$  Hz, 1H), 7.80 (d,  $J = 8.0$  Hz, 1H), 7.58 - 7.47 (m, 4H), 4.68 (q,  $J = 8.0$  Hz, 1H), 2.83 (t,  $J = 8.0$  Hz, 2H), 1.70 (d,  $J = 4.0$  Hz, 3H), 1.48 (m, 2H), 1.35 - 1.29 (m, 2H), 0.86 (t,  $J = 8.0$  Hz, 3H).  $^{13}\text{C}$  NMR (100 MHz,  $\text{CDCl}_3$ ):  $\delta = 202.0, 136.0, 134.0, 131.6, 129.1, 128.1, 126.4, 125.7, 125.6, 125.4, 123.2, 50.0, 31.4, 28.8, 21.9, 18.4, 13.5$ . HRMS (ESI)  $[\text{C}_{17}\text{H}_{20}\text{OS}+\text{H}]^+$  calculated mass 273.1308, measured mass 273.1298.

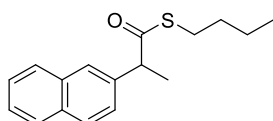

### **S-butyl 2-(naphthalen-2-yl) propanethioate (3k)**

Yellow liquid (Yield = 91%; 49.5 mg);  $^1\text{H}$  NMR (400 MHz,  $\text{CDCl}_3$ ):  $\delta = 7.82$  (d,  $J = 8.0$  Hz, 3H), 7.77 (s, 1H), 7.47 (m, 3H), 4.06 (q,  $J = 8.0$  Hz, 1H), 2.84 (m, 2H), 1.63 (d,  $J = 8.0$  Hz, 3H), 1.51 (m, 2H), 1.35 (m, 2H), 0.88 (t,  $J = 8.0$  Hz, 3H).  $^{13}\text{C}$  NMR (100 MHz,  $\text{CDCl}_3$ ):  $\delta = 201.3, 137.5, 133.5, 132.8, 128.4, 127.9, 127.7, 126.8, 126.2, 125.9, 54.4, 31.5, 28.9, 22.0, 18.5, 13.6$ . HRMS (ESI)  $[\text{C}_{17}\text{H}_{20}\text{OS}+\text{H}]^+$  calculated mass 273.1308, measured mass 273.1316.

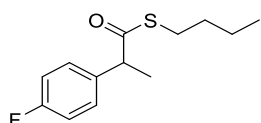

### **S-butyl 2-(4-fluorophenyl) propanethioate (3l)**

Yellow liquid (Yield = 81%; 38.9 mg);  $^1\text{H}$  NMR (400 MHz,  $\text{CDCl}_3$ ):  $\delta = 7.20$  (m, 2H), 6.94 (t,  $J = 8.0$  Hz, 2H), 3.79 (q,  $J = 8.0$  Hz, 1H), 2.82 - 2.69 (m, 2H), 1.44 (d,  $J = 4.0$  Hz, 3H), 1.42 (m, 2H), 1.30 - 1.23 (m, 2H), 0.81 (t,  $J = 8.0$  Hz, 3H).  $^{13}\text{C}$  NMR (100 MHz,  $\text{CDCl}_3$ ):  $\delta = 201.2, 162.2$  (d,  $J = 244.0$  Hz), 135.7 (d,  $J = 3.0$  Hz), 129.4 (d,  $J = 8.0$  Hz), 115.5 (d,  $J = 22.0$  Hz), 53.4, 31.4, 28.8, 21.9, 18.6, 13.5.  $^{19}\text{F}$  NMR (377 MHz,  $\text{CDCl}_3$ ):  $\delta = -115.29$ . HRMS (ESI)  $[\text{C}_{13}\text{H}_{18}\text{FOS}+\text{H}]^+$  calculated mass 241.1057, measured mass 241.1064.

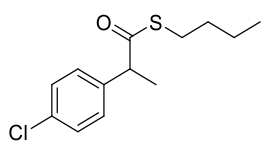

### **S-butyl 2-(4-chlorophenyl) propanethioate (3m)**



Yellow liquid (Yield = 83%; 42.5 mg);  $^1\text{H}$  NMR (400 MHz,  $\text{CDCl}_3$ ):  $\delta$  = 7.30 (d,  $J$  = 8.0 Hz, 2H), 7.24 (d,  $J$  = 8.0 Hz, 2H), 3.85 (q,  $J$  = 8.0 Hz, 1H), 2.90 - 2.77 (m, 2H), 1.52 (s, 3H), 1.49 (d,  $J$  = 8.0 Hz, 2H), 1.38 - 1.30 (m, 2H), 0.88 (t,  $J$  = 8.0 Hz, 3H).  $^{13}\text{C}$  NMR (100 MHz,  $\text{CDCl}_3$ ):  $\delta$  = 200.9, 138.5, 133.3, 129.2, 128.8, 53.6, 31.4, 28.9, 22.0, 18.5, 13.6. HRMS (ESI)  $[\text{C}_{13}\text{H}_{17}\text{ClOS}+\text{H}]^+$  calculated mass 257.0761, measured mass 257.0765.

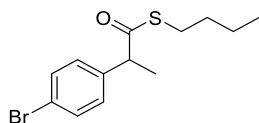

**S-butyl 2-(4-bromophenyl) propanethioate (3n)**

Yellow liquid (Yield = 84%; 50.4 mg);  $^1\text{H}$  NMR (400 MHz,  $\text{CDCl}_3$ ):  $\delta$  = 7.45 (d,  $J$  = 8.0 Hz, 2H), 7.18 (d,  $J$  = 8.0 Hz, 2H), 3.83 (q,  $J$  = 8.0 Hz, 1H), 2.83 (m, 2H), 1.50 (d,  $J$  = 8.0 Hz, 3H), 1.48 (t,  $J$  = 8.0 Hz, 2H), 1.34 (m, 2H), 0.88 (t,  $J$  = 8.0 Hz, 3H).  $^{13}\text{C}$  NMR (100 MHz,  $\text{CDCl}_3$ ):  $\delta$  = 198.9, 137.1, 129.9, 127.7, 119.5, 51.7, 29.5, 27.0, 20.0, 16.5, 11.6. HRMS (ESI)  $[\text{C}_{13}\text{H}_{17}\text{BrOS}+\text{Na}]^+$  calculated mass 323.0076, measured mass 323.0077.

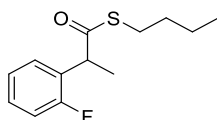

**S-butyl 2-(2-fluorophenyl) propanethioate (3o)**

Yellow liquid (Yield = 80%; 38.4 mg);  $^1\text{H}$  NMR (400 MHz,  $\text{CDCl}_3$ ):  $\delta$  = 7.59 (d,  $J$  = 8.0 Hz, 2H), 7.43 (d,  $J$  = 8.0 Hz, 2H), 3.95 (q,  $J$  = 8.0 Hz, 1H), 2.85 (m, 2H), 1.55 (d,  $J$  = 4.0 Hz, 3H), 1.53 - 1.45 (m, 2H), 1.35 (m, 2H), 0.89 (t,  $J$  = 8.0 Hz, 3H).  $^{13}\text{C}$  NMR (100 MHz,  $\text{CDCl}_3$ ):  $\delta$  = 200.7, 160.5 (d,  $J$  = 246.0 Hz), 129.0 (d,  $J$  = 3.0 Hz), 129.0 (d,  $J$  = 6.0 Hz), 127.2 (d,  $J$  = 14 Hz), 124.3 (d,  $J$  = 3.0 Hz), 115.5 (d,  $J$  = 22 Hz), 46.5 (d,  $J$  = 3.0 Hz), 31.5, 28.8, 21.9, 17.5, 13.6.  $^{19}\text{F}$  NMR (377 MHz,  $\text{CDCl}_3$ ):  $\delta$  = -117.51. HRMS (ESI)  $[\text{C}_{13}\text{H}_{17}\text{FOS}+\text{H}]^+$  calculated mass 241.1057, measured mass 241.1056.

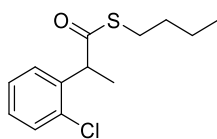

**S-butyl 2-(2-chlorophenyl) propanethioate (3p)**

Yellow liquid (Yield = 83%; 42.5 mg);  $^1\text{H}$  NMR (400 MHz,  $\text{CDCl}_3$ ):  $\delta$  = 7.37 (t,  $J$  = 8.0 Hz, 2H), 7.24 (d,  $J$  = 4.0 Hz, 2H), 4.42 (q,  $J$  = 8.0 Hz, 1H), 2.85 (m, 2H), 1.53 - 1.52 (d,  $J$  = 4.0 Hz, 3H), 1.50 (t,  $J$  = 8.0 Hz, 2H), 1.39 - 1.32 (m, 2H), 0.89 (t,  $J$  = 8.0 Hz, 3H).  $^{13}\text{C}$  NMR (100 MHz,  $\text{CDCl}_3$ ):  $\delta$  = 200.7, 137.7, 134.2, 129.7, 128.9, 128.6, 127.2, 50.2, 31.5, 28.8, 21.9, 17.8, 13.5. HRMS (ESI)  $[\text{C}_{13}\text{H}_{17}\text{ClOS}+\text{H}]^+$  calculated mass 257.0761, measured mass 257.0755.

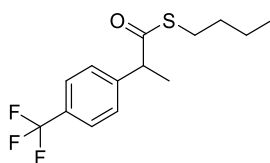

**S-butyl 2-(4-(trifluoromethyl)phenyl) propanethioate (3q)**

Yellow liquid (Yield = 85%; 49.3 mg);  $^1\text{H}$  NMR (400 MHz,  $\text{CDCl}_3$ ):  $\delta$  = 7.59 (d,  $J$  = 8.0 Hz, 2H), 7.43 (d,  $J$  = 8.0 Hz, 2H), 3.95 (q,  $J$  = 8.0 Hz, 1H), 2.85 (m, 2H), 1.55 (d,  $J$  = 4.0 Hz, 3H), 1.53 - 1.45 (m, 2H), 1.35 (m, 2H), 0.89 (t,  $J$  = 8.0 Hz, 3H).  $^{13}\text{C}$  NMR (100 MHz,  $\text{CDCl}_3$ ):  $\delta$  = 200.5, 143.9, 129.7 (q,  $J$  = 33.0 Hz), 128.2, 125.6 (q,  $J$  = 4.0 Hz), 124.1 (d,  $J$  = 270 Hz), 54.01, 31.40, 28.92, 21.95, 18.51, 13.53.  $^{19}\text{F}$  NMR (377 MHz,  $\text{CDCl}_3$ ):  $\delta$  = -62.56. HRMS (ESI)  $[\text{C}_{14}\text{H}_{17}\text{F}_3\text{OS}+\text{Na}]^+$  calculated mass 313.0844, measured mass 313.0837.

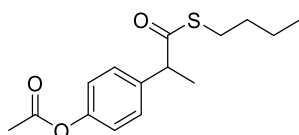

**4-(1-(butylthio)-1-oxopropan-2-yl) phenyl acetate (3r)**

Yellow liquid (Yield = 84%; 47.0 mg);  $^1\text{H}$  NMR (400 MHz,  $\text{CDCl}_3$ ):  $\delta$  = 7.25 (d,  $J$  = 8.0 Hz, 2H), 6.98 (d,  $J$  = 8.0 Hz, 2H), 3.81 (q,  $J$  = 8.0 Hz, 1H), 2.76 (m, 2H), 2.22 (s, 3H), 1.45 (d,  $J$  = 8.0 Hz, 3H), 1.42 (t,  $J$  = 8.0 Hz, 2H), 1.32 - 1.25 (m, 2H), 0.82 (t,  $J$  = 8.0 Hz, 3H).  $^{13}\text{C}$  NMR (100 MHz,  $\text{CDCl}_3$ ):  $\delta$  = 201.0, 169.4, 150.0, 137.5, 128.9, 121.7, 53.6, 31.4, 28.8, 22.0, 21.1, 18.6, 13.5. HRMS (ESI)  $[\text{C}_{15}\text{H}_{20}\text{O}_3\text{S}+\text{Na}]^+$  calculated mass 303.1025, measured mass 303.1027.

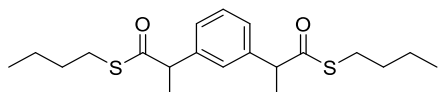

**S, S'-dibutyl 2, 2'-(1,3-phenylene)dipropylthioate (3s)<sup>12</sup>**

Yellow liquid (Yield = 58%; 42.5 mg);  $^1\text{H}$  NMR (400 MHz,  $\text{CDCl}_3$ ):  $\delta$  = 7.32 - 7.29 (m, 1H), 7.25 (d,  $J$  = 8.0 Hz, 2H), 7.17 (s, 1H), 3.90 (m, 2H), 2.89 - 2.83 (m, 4H), 1.56 (s, 6H), 1.56 - 1.50 (m, 4H), 1.37 (m, 4H), 0.91 (t,  $J$  = 8.0 Hz, 6H).  $^{13}\text{C}$  NMR (100 MHz,  $\text{CDCl}_3$ ):  $\delta$  = 201.2, 140.4, 128.9, 127.8, 126.8, 54.2, 31.5, 28.8, 21.9, 18.5, 13.6.

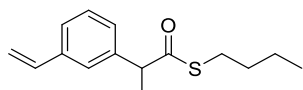

**S-butyl 2-(3-vinylphenyl)propanethioate (3t)**

Yellow liquid (Yield = 29%; 14.4 mg);  $^1\text{H}$  NMR (400 MHz,  $\text{CDCl}_3$ ):  $\delta$  = 7.34 - 7.31 (m, 2H), 7.29 - 7.26 (m, 1H), 7.21 (d,  $J$  = 8.0 Hz, 1H), 6.71 (m, 1H), 5.76 (d,  $J$  = 16.0 Hz, 1H), 5.26 (d,  $J$  = 8.0 Hz, 1H), 3.88 (q,  $J$  = 8.0 Hz, 1H), 2.90 - 2.77 (m, 2H), 1.53 (d,  $J$  = 4.0 Hz, 3H), 1.51 - 1.48 (m, 2H), 1.38 - 1.32 (m, 2H), 0.88 (t,  $J$  = 8.0 Hz, 3H).  $^{13}\text{C}$  NMR (100 MHz,  $\text{CDCl}_3$ ):  $\delta$  = 201.2, 140.3, 140.0, 136.7, 128.8, 127.3, 125.9, 125.2, 114.2, 54.2, 31.5, 28.8, 22.0, 18.5, 13.5. HRMS (ESI)  $[\text{C}_{15}\text{H}_{20}\text{OS}+\text{Na}]^+$  calculated mass 271.1128, measured mass 271.1127.

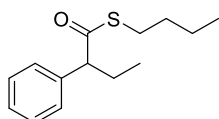

**S-butyl 2-phenylbutanethioate (3u/3ak)**

Yellow liquid; Yield (3ak) = 67% (31.6 mg); Yield (3u) = 88% (41.5 mg);  $^1\text{H}$  NMR (400 MHz,  $\text{CDCl}_3$ ):  $\delta$  = 7.27 (d,  $J$  = 8.0 Hz, 3H), 7.22 (d,  $J$  = 8.0 Hz, 2H), 3.58 (t,  $J$  = 8.0 Hz, 1H), 2.80 (m, 2H), 2.13 (m, 1H), 1.80 (m, 1H), 1.49 - 1.42 (m, 2H), 1.33 - 1.26 (m, 2H), 0.84 (m, 6H).  $^{13}\text{C}$  NMR (100 MHz,  $\text{CDCl}_3$ ):  $\delta$  = 200.7, 138.7, 128.6, 128.2, 127.3, 62.3, 31.5, 28.8, 26.6, 21.9, 13.5, 12.1. HRMS (ESI)  $[\text{C}_{14}\text{H}_{20}\text{OS}+\text{Na}]^+$  calculated mass 259.1127, measured mass 259.1131.

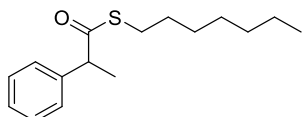

**S-heptyl 2-phenylpropanethioate (3v)<sup>4</sup>**

Yellow liquid (Yield = 85%; 44.9 mg);  $^1\text{H}$  NMR (400 MHz,  $\text{CDCl}_3$ ):  $\delta$  = 7.27 (t,  $J$  = 8.0 Hz, 3H), 7.22 (d,  $J$  = 8.0 Hz, 2H), 3.83 (q,  $J$  = 8.0 Hz, 1H), 2.77 (m, 2H), 1.48 (m,  $J$  = 8.0 Hz, 3H), 1.45 (t,  $J$  = 8.0 Hz, 2H), 1.26 - 1.16 (m, 8H), 0.81 (t,  $J$  = 8.0 Hz, 3H).  $^{13}\text{C}$  NMR (100 MHz,  $\text{CDCl}_3$ ):  $\delta$  = 201.3, 140.1, 128.6, 127.9, 127.4, 54.3, 31.7, 29.4, 29.1, 28.8, 28.7, 22.6, 18.5, 14.0.

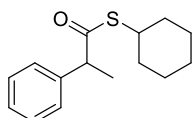

**S-cyclohexyl 2-phenylpropanethioate (3w)<sup>13</sup>**

Yellow liquid (Yield = 87%; 43.2 mg);  $^1\text{H}$  NMR (400 MHz,  $\text{CDCl}_3$ ):  $\delta$  = 7.28 (t,  $J$  = 8.0 Hz, 3H), 7.22 (d,  $J$  = 8.0 Hz, 2H), 3.79 (q,  $J$  = 8.0 Hz, 1H), 3.41 (m, 1H), 1.90 - 1.72 (m, 2H), 1.69 - 1.56 (m, 2H), 1.47 (d,  $J$  = 8.0 Hz, 3H), 1.39 - 1.32 (m, 2H), 1.32 - 1.26 (m, 2H), 1.27 - 1.11 (m, 2H).  $^{13}\text{C}$  NMR (100 MHz,  $\text{CDCl}_3$ ):  $\delta$  = 201.0, 140.2, 128.6, 127.9, 127.3, 54.3, 42.5, 33.1, 32.9, 26.0, 26.0, 25.6, 18.5.

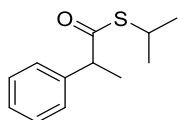

**S-isopropyl 2-phenylpropanethioate (3x)**<sup>14</sup>

Yellow liquid (Yield = 80%; 33.3 mg); <sup>1</sup>H NMR (400 MHz, CDCl<sub>3</sub>): δ = 7.33 - 7.29 (m, 3H), 7.26 (d, *J* = 4.0 Hz, 2H), 3.84 (q, *J* = 8.0 Hz, 1H), 3.59 (m, 1H), 1.52 (d, *J* = 8.0 Hz, 3H), 1.28 (d, *J* = 8.0 Hz, 3H), 1.22 (d, *J* = 4.0 Hz, 3H). <sup>13</sup>C NMR (100 MHz, CDCl<sub>3</sub>): δ = 201.3, 140.1, 128.6, 127.9, 127.3, 54.2, 34.8, 22.9, 22.8, 18.4.

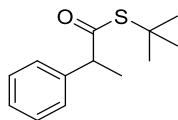

**S-(tert-butyl) 2-phenylpropanethioate (3y)**<sup>13</sup>

Yellow liquid (Yield = 77%; 34.2 mg); <sup>1</sup>H NMR (400 MHz, CDCl<sub>3</sub>) δ 7.26 - 7.14 (m, 5H), 3.72 (q, *J* = 8.0 Hz, 1H), 1.40 (d, *J* = 8.0 Hz, 3H), 1.34 (s, 9H). <sup>13</sup>C NMR (100 MHz, CDCl<sub>3</sub>): δ = 201.5, 140.3, 128.5, 127.7, 127.1, 54.5, 47.8, 29.7, 18.5.

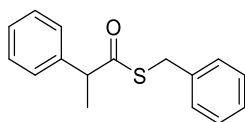

**S-benzyl 2-phenylpropanethioate (3z)**<sup>4</sup>

Yellow liquid (Yield = 68%; 34.8 mg); <sup>1</sup>H NMR (400 MHz, CDCl<sub>3</sub>): δ = 7.35 (t, *J* = 8.0 Hz, 6H), 7.27 (d, *J* = 4.0 Hz, 4H), 4.17 - 4.03 (m, 2H), 3.92 (q, *J* = 8.0 Hz, 1H), 1.58 (d, *J* = 4.0 Hz, 3H). <sup>13</sup>C NMR (100 MHz, CDCl<sub>3</sub>): δ = 200.5, 139.7, 137.4, 128.8, 128.7, 128.6, 128.0, 127.5, 127.2, 54.1, 33.5, 18.4.

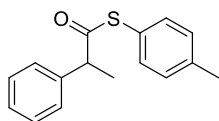

**S-(p-tolyl) 2-phenylpropanethioate (3aa)**<sup>13</sup>

Yellow liquid (Yield = 64%; 32.8 mg); <sup>1</sup>H NMR (400 MHz, CDCl<sub>3</sub>): δ = 7.27 (d, *J* = 4.0 Hz, 4H), 7.15 (t, *J* = 8.0 Hz, 3H), 7.09 (d, *J* = 8.0 Hz, 2H), 3.90 (q, *J* = 8.0 Hz, 1H), 2.26 (s, 3H), 1.48 (d, *J* = 8.0 Hz, 3H). <sup>13</sup>C NMR (100 MHz, CDCl<sub>3</sub>): δ = 199.5, 139.7, 139.5, 134.4, 129.9, 128.8, 128.1, 127.5, 124.4, 54.0, 21.3, 18.7.

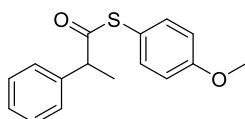

**S-(4-methoxyphenyl) 2-phenylpropanethioate (3ab)**

Yellow liquid (Yield = 65%; 35.4 mg); <sup>1</sup>H NMR (400 MHz, CDCl<sub>3</sub>): δ = 7.33 - 7.22 (m, 5H), 7.17 (d, *J* = 8.0 Hz, 2H), 6.82 (d, *J* = 8.0 Hz, 2H), 3.91 (q, *J* = 8.0 Hz, 1H), 3.72 (s, 3H), 1.49 (d, *J* = 8.0 Hz, 3H). <sup>13</sup>C NMR (100 MHz, CDCl<sub>3</sub>): δ = 200.0, 160.6, 139.7, 136.0, 132.7, 128.7, 128.0, 127.5, 114.8, 55.3, 53.8, 18.7. HRMS (ESI) [C<sub>16</sub>H<sub>16</sub>O<sub>2</sub>S+H]<sup>+</sup> calculated mass 273.0944, measured mass 273.0950.

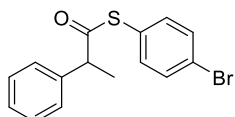

**S-(4-bromophenyl) 2-phenylpropanethioate (3ac)**<sup>13</sup>

Yellow liquid (Yield = 58%; 37.0 mg); <sup>1</sup>H NMR (400 MHz, CDCl<sub>3</sub>): δ = 7.50 (d, *J* = 8.0 Hz, 2H), 7.35 (t, *J* = 8.0 Hz, 5H), 7.20 (d, *J* = 8.0 Hz, 2H), 3.99 (q, *J* = 4.0 Hz, 1H), 1.58 (d, *J* = 8.0 Hz, 3H). <sup>13</sup>C NMR (100 MHz, CDCl<sub>3</sub>): δ = 198.4, 139.3, 135.9, 132.3, 128.8, 128.1, 127.7, 127.1, 123.9, 54.2, 18.5.

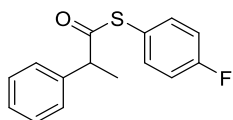

**S-(4-fluorophenyl) 2-phenylpropanethioate (3ad)**

Yellow liquid (Yield = 75%; 39 mg);  $^1\text{H NMR}$  (400 MHz,  $\text{CDCl}_3$ ):  $\delta$  = 7.37 (d,  $J$  = 8.0 Hz, 2H), 7.35 - 7.28 (m, 5H), 7.06 (t,  $J$  = 8.0 Hz, 2H), 3.99 (q,  $J$  = 8.0 Hz, 1H), 1.58 (d,  $J$  = 8.0 Hz, 3H).  $^{13}\text{C NMR}$  (100 MHz,  $\text{CDCl}_3$ ):  $\delta$  = 199.1, 163.4 (d,  $J$  = 249.0 Hz), 139.4, 136.5 (d,  $J$  = 8.0 Hz), 128.8, 128.0, 127.7, 123.2 (d,  $J$  = 3.0 Hz), 116.4 (d,  $J$  = 23.0 Hz), 54.0, 18.6.  $^{19}\text{F NMR}$  (377 MHz,  $\text{CDCl}_3$ ):  $\delta$  = -111.35. HRMS (ESI) [ $\text{C}_{15}\text{H}_{13}\text{FOS}+\text{H}$ ] $^+$  calculated mass 261.0744, measured mass 261.0748.

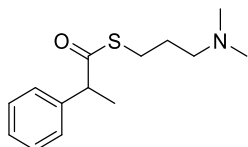

**S-(3-(dimethylamino)propyl) 2-phenylpropanethioate (3ae)**

Yellow liquid (Yield = 63%; 31.6 mg);  $^1\text{H NMR}$  (400 MHz,  $\text{CDCl}_3$ ):  $\delta$  = 7.28 - 7.21 (m, 5H), 3.83 (q,  $J$  = 8.0 Hz, 1H), 2.80 (t,  $J$  = 8.0 Hz, 2H), 2.20 (t,  $J$  = 7.3 Hz, 2H), 2.12 (s, 6H), 1.63 (m, 2H), 1.48 (d,  $J$  = 8.0 Hz, 3H).  $^{13}\text{C NMR}$  (100 MHz,  $\text{CDCl}_3$ ):  $\delta$  = 201.1, 140.0, 128.7, 127.9, 127.4, 58.4, 54.3, 45.4, 27.6, 27.0, 18.4. HRMS (ESI) [ $\text{C}_{14}\text{H}_{21}\text{NOS}+\text{H}$ ] $^+$  calculated mass 252.1420, measured mass 252.1417.

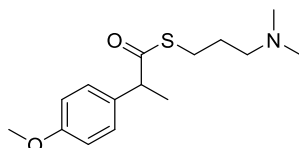

**S-(3-(dimethylamino)propyl) 2-(4-methoxyphenyl)propanethioate (3af)**

Yellow liquid (Yield = 85%; 47.8 mg);  $^1\text{H NMR}$  (400 MHz,  $\text{CDCl}_3$ ):  $\delta$  = 7.21 (d,  $J$  = 8.0 Hz, 2H), 6.86 (d,  $J$  = 8.0 Hz, 2H), 3.83 (m, 1H), 3.78 (s, 3H), 2.84 (m, 2H), 2.25 (t,  $J$  = 8.0 Hz, 2H), 2.17 (s, 6H), 1.68 (m, 2H), 1.49 (d,  $J$  = 4.0 Hz, 3H).  $^{13}\text{C NMR}$  (100 MHz,  $\text{CDCl}_3$ ):  $\delta$  = 201.5, 159.0, 132.0, 129.0, 114.1, 58.4, 55.2, 53.4, 45.4, 27.6, 27.0, 18.4. HRMS (ESI) [ $\text{C}_{15}\text{H}_{23}\text{NO}_2\text{S}+\text{H}$ ] $^+$  calculated mass 282.1523, measured mass 282.1528.

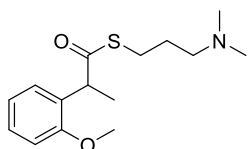

**S-(3-(dimethylamino)propyl) 2-(2-methoxyphenyl)propanethioate (3ag)**

Yellow liquid (Yield = 80%; 45.0 mg);  $^1\text{H NMR}$  (400 MHz,  $\text{CDCl}_3$ ):  $\delta$  = 7.25 (t,  $J$  = 8.0 Hz, 2H), 6.95 (t,  $J$  = 8.0 Hz, 1H), 6.87 (d,  $J$  = 8.0 Hz, 1H), 4.25 (q,  $J$  = 8.0 Hz, 1H), 3.82 (s, 3H), 2.83 (t,  $J$  = 8.0 Hz, 2H), 2.26 (t,  $J$  = 8.0 Hz, 2H), 2.18 (s, 6H), 1.68 (m, 2H), 1.48 (d,  $J$  = 8.0 Hz, 3H).  $^{13}\text{C NMR}$  (100 MHz,  $\text{CDCl}_3$ ):  $\delta$  = 202.0, 157.1, 128.6, 128.6, 128.4, 120.7, 110.7, 58.5, 55.5, 47.3, 45.4, 27.7, 26.9, 17.2. HRMS (ESI) [ $\text{C}_{15}\text{H}_{23}\text{NO}_2\text{S}+\text{H}$ ] $^+$  calculated mass 282.1526, measured mass 282.1522.

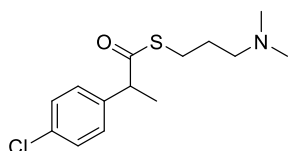

**S-(3-(dimethylamino)propyl) 2-(4-chlorophenyl)propanethioate (3ah)**

Yellow liquid (Yield = 42%; 23.9 mg);  $^1\text{H NMR}$  (400 MHz,  $\text{CDCl}_3$ ):  $\delta$  = 7.31 (d,  $J$  = 8.0 Hz, 2H), 7.25 (d,  $J$  = 8.0 Hz, 2H), 3.86 (m, 1H), 2.87 (t,  $J$  = 8.0 Hz, 2H), 2.27 (t,  $J$  = 8.0 Hz, 2H), 2.19 (s, 6H), 1.70 (m, 2H), 1.52 (d,  $J$  = 8.0 Hz, 3H).  $^{13}\text{C NMR}$  (100 MHz,  $\text{CDCl}_3$ ):  $\delta$  = 200.7, 138.4, 133.3, 129.2, 128.8, 58.4, 53.6, 45.4, 27.5, 27.1, 18.4. HRMS (ESI) [ $\text{C}_{14}\text{H}_{20}\text{ClNOS}+\text{H}$ ] $^+$  calculated mass 286.1029, measured mass 286.1027.

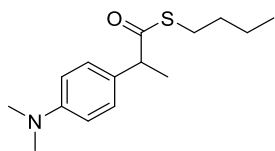

**S-butyl (S)-2-(4-(dimethylamino)phenyl)propanethioate (3ai)**

Yellow liquid (Yield = 73%; 38.7 mg); <sup>1</sup>H NMR (400 MHz, CDCl<sub>3</sub>): δ = 7.18 (d, *J* = 12.0 Hz, 2H), 6.70 (d, *J* = 12.0 Hz, 2H), 3.78 (q, *J* = 8.0 Hz, 1H), 2.94 (s, 6H), 2.81 (m, 2H), 1.50 (d, *J* = 8.0 Hz, 3H), 1.49 (m, 2H), 1.36 - 1.32 (m, 2H), 0.89 (t, *J* = 8.0 Hz, 3H). <sup>13</sup>C NMR (100 MHz, CDCl<sub>3</sub>): δ = 202.2, 150.0, 128.7, 127.7, 112.6, 53.4, 40.6, 31.6, 28.8, 22.0, 18.4, 13.6. HRMS (ESI) [C<sub>15</sub>H<sub>23</sub>NOS+H]<sup>+</sup> calculated mass 266.1575, measured mass 266.1573.

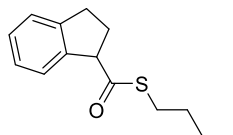

**S-butyl 2,3-dihydro-1H-indene-1-carbothioate (3aj)**

Yellow liquid (Yield = 79%; 37.0 mg); <sup>1</sup>H NMR (400 MHz, CDCl<sub>3</sub>): δ = 7.38 (d, *J* = 8.0 Hz, 1H), 7.27 (d, *J* = 8.0 Hz, 1H), 7.22 (t, *J* = 8.0 Hz, 2H), 4.23 (q, *J* = 4.0 Hz, 1H), 3.15 (m, 1H), 2.99 - 2.87 (m, 3H), 2.50 - 2.33 (m, 2H), 1.59 - 1.54 (m, 2H), 1.40 (m, 2H), 0.92 (t, *J* = 8.0 Hz, 3H). <sup>13</sup>C NMR (100 MHz, CDCl<sub>3</sub>): δ = 201.1, 144.6, 140.7, 127.8, 126.5, 125.1, 124.8, 59.1, 31.9, 31.6, 30.0, 28.8, 22.0, 13.6. HRMS (ESI) [C<sub>14</sub>H<sub>18</sub>OS+Na]<sup>+</sup> calculated mass 257.0971, measured mass 257.0971.

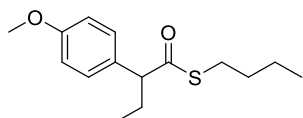

**S-butyl 2-(4-methoxyphenyl)butanethioate (3al)**

Yellow liquid (Yield = 73%; 38.8 mg); <sup>1</sup>H NMR (400 MHz, CDCl<sub>3</sub>): δ = 7.21 (d, *J* = 12.0 Hz, 2H), 6.86 (d, *J* = 8.0 Hz, 2H), 3.79 (s, 3H), 3.57 (t, *J* = 8.0 Hz, 1H), 2.82 (m, 2H), 2.13 (m, 1H), 1.80 (m, 1H), 1.50 (m, 2H), 1.35 (m, 2H), 0.88 (t, *J* = 8.0 Hz, 6H). <sup>13</sup>C NMR (100 MHz, CDCl<sub>3</sub>): δ = 201.1, 158.9, 130.7, 129.2, 114.0, 61.4, 55.2, 31.5, 28.7, 26.6, 22.0, 13.5, 12.1. HRMS (ESI) [C<sub>15</sub>H<sub>22</sub>O<sub>2</sub>S+Na]<sup>+</sup> calculated mass 289.1233, measured mass 289.1234.

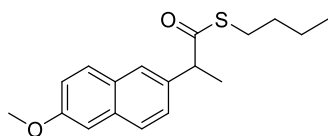

**S-butyl 2-(6-methoxynaphthalen-2-yl)propanethioate (3am)<sup>15</sup>**

Yellow liquid (Yield = 89%; 53.8 mg); <sup>1</sup>H NMR (400 MHz, CDCl<sub>3</sub>): δ = 7.75 - 7.71 (m, 3H), 7.43 (m, 1H), 7.19 - 7.13 (m, 2H), 4.04 (q, *J* = 8.0 Hz, 1H), 3.91 (s, 3H), 2.93 - 2.80 (m, 2H), 1.64 (d, *J* = 8.0 Hz, 3H), 1.57 - 1.49 (m, 2H), 1.36 (m, 2H), 0.90 (t, *J* = 8.0 Hz, 3H). <sup>13</sup>C NMR (100 MHz, CDCl<sub>3</sub>): δ = 201.4, 157.8, 135.2, 133.9, 129.4, 129.0, 127.2, 126.6, 126.5, 119.1, 105.7, 55.3, 54.3, 31.5, 28.9, 22.0, 18.5, 13.6.

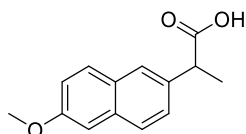

**2-(6-methoxynaphthalen-2-yl)propanoic acid (3am')<sup>16</sup>**

White solid (Yield = 91%; 41.9 mg); <sup>1</sup>H NMR (400 MHz, DMSO-*d*<sub>6</sub>): δ = 12.29 (s, 1H), 7.76 (t, *J* = 8.0 Hz, 2H), 7.69 (s, 1H), 7.38 (m, 1H), 7.26 (d, *J* = 4.0 Hz, 1H), 7.13 (m, 1H), 3.84 (s, 3H), 3.78 (q, *J* = 8.0 Hz, 1H), 1.42 (d, *J* = 8.0 Hz, 3H). <sup>13</sup>C NMR (100 MHz, DMSO-*d*<sub>6</sub>): δ = 176.0, 157.6, 136.8, 133.7, 129.6, 128.9, 127.3, 126.9, 126.1, 119.2, 106.2, 55.6, 45.1, 18.9.

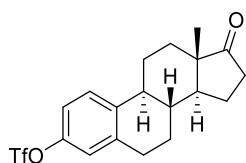

**(8R,9S,13S,14S)-13-methyl-17-oxo-7,8,9,11,12,13,14,15,16,17-decahydro-6H-cyclopenta[a]phenanthren-3-yl trifluoromethanesulfonate (S1)<sup>11</sup>**

White solid (Yield = 90%; 1.34 g); <sup>1</sup>H NMR (400 MHz, CDCl<sub>3</sub>): δ = 7.34 (d, *J* = 8.0 Hz, 1H), 7.03 (d, *J* = 8.0 Hz, 1H), 6.99 (s, 1H), 2.94 (m, 2H), 2.51 (m, 1H), 2.45 - 2.36 (m, 1H), 2.30 (m, 1H), 2.22 - 2.12 (m, 1H), 2.05 (m, 2H), 2.01 - 1.94 (m, 1H), 1.70 - 1.59 (m, 3H), 1.55 - 1.47 (m, 3H), 0.92 (s, 3H). <sup>13</sup>C NMR (100 MHz, CDCl<sub>3</sub>): δ = 220.3, 147.6, 140.3, 139.3, 127.2, 121.2, 118.3, 50.4, 47.9, 44.1, 37.8, 35.8, 31.5, 29.4, 26.1, 25.7, 21.6, 13.8.

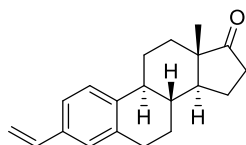

**(8R,9S,13S,14S)-13-methyl-3-vinyl-6,7,8,9,11,12,13,14,15,16-decahydro-17H-cyclopenta[a]phenanthren-17-one (1an)<sup>10</sup>**

White solid (Yield = 87%; 363 mg); <sup>1</sup>H NMR (400 MHz, CDCl<sub>3</sub>): δ = 7.26 (d, *J* = 8.0 Hz, 1H), 7.21 (d, *J* = 8.0 Hz, 1H), 7.14 (s, 1H), 6.66 (m, 1H), 5.70 (d, *J* = 8.0 Hz, 1H), 5.19 (d, *J* = 8.0 Hz, 1H), 2.92 (m, 2H), 2.58 - 2.37 (m, 2H), 2.30 (m, 1H), 2.21 - 2.11 (m, 1H), 2.10 - 2.00 (m, 2H), 2.00 - 1.89 (m, 1H), 1.65 - 1.56 (m, 3H), 1.54 - 1.45 (m, 3H), 0.91 (s, 3H). <sup>13</sup>C NMR (100 MHz, CDCl<sub>3</sub>): δ = 220.8, 139.6, 136.6, 136.6, 135.3, 126.9, 125.5, 123.6, 113.2, 50.6, 48.0, 44.5, 38.2, 35.9, 31.6, 29.4, 26.5, 25.7, 21.6, 13.9.

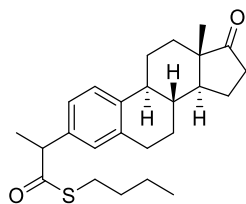

**S-butyl 2-((8R,9S,13S,14S)-13-methyl-17-oxo-7,8,9,11,12,13,14,15,16,17-decahydro-6H-cyclopenta[a]phenanthren-3-yl)propanethioate (3an)**

Yellow liquid (Yield = 83%; 66 mg); <sup>1</sup>H NMR (400 MHz, CDCl<sub>3</sub>): δ = 7.25 (d, *J* = 8.0 Hz, 1H), 7.09 (d, *J* = 8.0 Hz, 1H), 7.04 (s, 1H), 3.83 (q, *J* = 8.0 Hz, 1H), 2.91 (m, 2H), 2.88 - 2.75 (m, 2H), 2.50 (m, 1H), 2.41 (m, 1H), 2.29 (m, 1H), 2.15 (m, 1H), 2.10 - 2.03 (m, 2H), 2.03 - 1.90 (m, 2H), 1.64 - 1.58 (m, 2H), 1.58 - 1.53 (m, 2H), 1.52 (s, 3H), 1.49 - 1.44 (m, 2H), 1.39 - 1.32 (m, 2H), 1.30 - 1.24 (m, 1H), 0.90 (m, 3H), 0.89 (s, 3H). <sup>13</sup>C NMR (100 MHz, CDCl<sub>3</sub>): δ = 220.6, 201.3, 138.9, 137.5, 136.8, 128.3, 125.6, 125.2, 53.8, 50.6, 48.0, 44.4, 38.1, 35.8, 31.7, 31.5, 29.4, 28.8, 26.5, 25.7, 22.0, 21.6, 18.6, 13.9, 13.6. HRMS (ESI) [C<sub>25</sub>H<sub>34</sub>O<sub>2</sub>S+Na]<sup>+</sup> calculated mass 421.2174, measured mass 421.2177.

## 12. References

- 1 T. Ye, L. Xu, Z. Zhang, R. Chen, H. Li, X. Hui, C. Zheng and W. Huang, *J. Am. Chem. Soc.*, 2016, **138**, 9655-9662.
- 2 A. D. Burrows, M. F. Mahon and M. Varrone, *Dalton Trans.*, 2004, **20**, 3321-3330.
- 3 V. Hirschbeck, P. H. Gehrtz and I. Fleischer, *J. Am. Chem. Soc.*, 2016, **138**, 16794-16799.
- 4 X. Ren, Z. Zheng, L. Zhang, Z. Wang, C. Xia and K. Ding, *Angew. Chem., Int. Ed.*, 2016, **55**, 1-5.
- 5 Y. Kratish, D. Bravo-Zhivotovskii and Y. Apeloig, *ACS Omega*, 2017, **2**, 372-376.
- 6 M. Clericuzio, I. Degani, S. Dughera and R. Fochi, *Synthesis*, 2002, **7**, 921-927.
- 7 Y.-H. Yao, H.-Y. Yang, M. Chen, F. Wu, X.-X. Xu and Z.-H. Guan, *J. Am. Chem. Soc.*, 2021, **143**, 85-91.
- 8 M. J. Frisch, G. W. Trucks, H. B. Schlegel, G. E. Scuseria, M. A. Robb, J. R. Cheeseman, G. Scalmani, V. Barone, B.

- Mennucci, G. A. Petersson, H. Nakatsuji, M. Caricato, X. Li, H. P. Hratchian, A. F. Izmaylov, J. Bloino, G. Zheng, J. L. Sonnenberg, M. Hada, M. Ehara, K. Toyota, R. Fukuda, J. Hasegawa, M. Ishida, T. Nakajima, Y. Honda, O. Kitao, H. Nakai, T. Vreven, J. A. Jr. Montgomery, J. E. Peralta, F. Ogliaro, M. Bearpark, J. J. Heyd, E. Brothers, K. N. Kudin, V. N. Staroverov, R. Kobayashi, J. Normand, K. Raghavachari, A. Rendell, J. C. Burant, S. S. Iyengar, J. Tomasi, M. Cossi, N. Rega, N. J. Millam, M. Klene, J. E. Knox, J. B. Cross, V. Bakken, C. Adamo, J. Jaramillo, R. Gomperts, R. E. Stratmann, O. Yazyev, A. J. Austin, R. Cammi, C. Pomelli, J. W. Ochterski, R. L. Martin, K. Morokuma, V. G. Zakrzewski, G. A. Voth, P. Salvador, J. J. Dannenberg, S. Dapprich, A. D. Daniels, O. Farkas, J. B. Foresman, J. V. Ortiz, J. Cioslowski and D. J. Fox, 2009. Gaussian 09. A.02 edn. Gaussian, Inc.: Wallingford CT.
- 9 S. Zhang, W.-Q. Chen, A. Yu and L.-N. He, *ChemCatChem*, 2015, **7**, 3972-3977.
  - 10 R. Skoda-Földes, L. Kollár, F. Marinelli and A. Arcadi, *Steroids*, 1994, **59**, 691-695.
  - 11 T. Furuya, A. E. Strom and T. Ritter, *J. Am. Chem. Soc.*, 2009, **131**, 1662-1663.
  - 12 D. J. Crowley, U.S. Patent 3373205A, 1968.
  - 13 H.-J. Ai, F. Zhao, H.-Q. Geng and X.-F. Wu, *ACS Catal.*, 2021, **11**, 3614-3619.
  - 14 J. Liao, X. Wang, W. Yu and M. Wang, C.N. Patent 110183366 A, 2019.
  - 15 C.-S. Chang, S.-W. Tsai and C.-N. Lin, *Tetrahedron: Asymmetry*, 1998, **9**, 2799-2807.
  - 16 K. B. Rajurkar, S. S. Tonde, M. R. Didgikar, S. S. Joshi and R. V. Chaudhari, *Ind. Eng. Chem. Res.*, 2007, **46**, 8480-8489.

### 13. NMR spectra

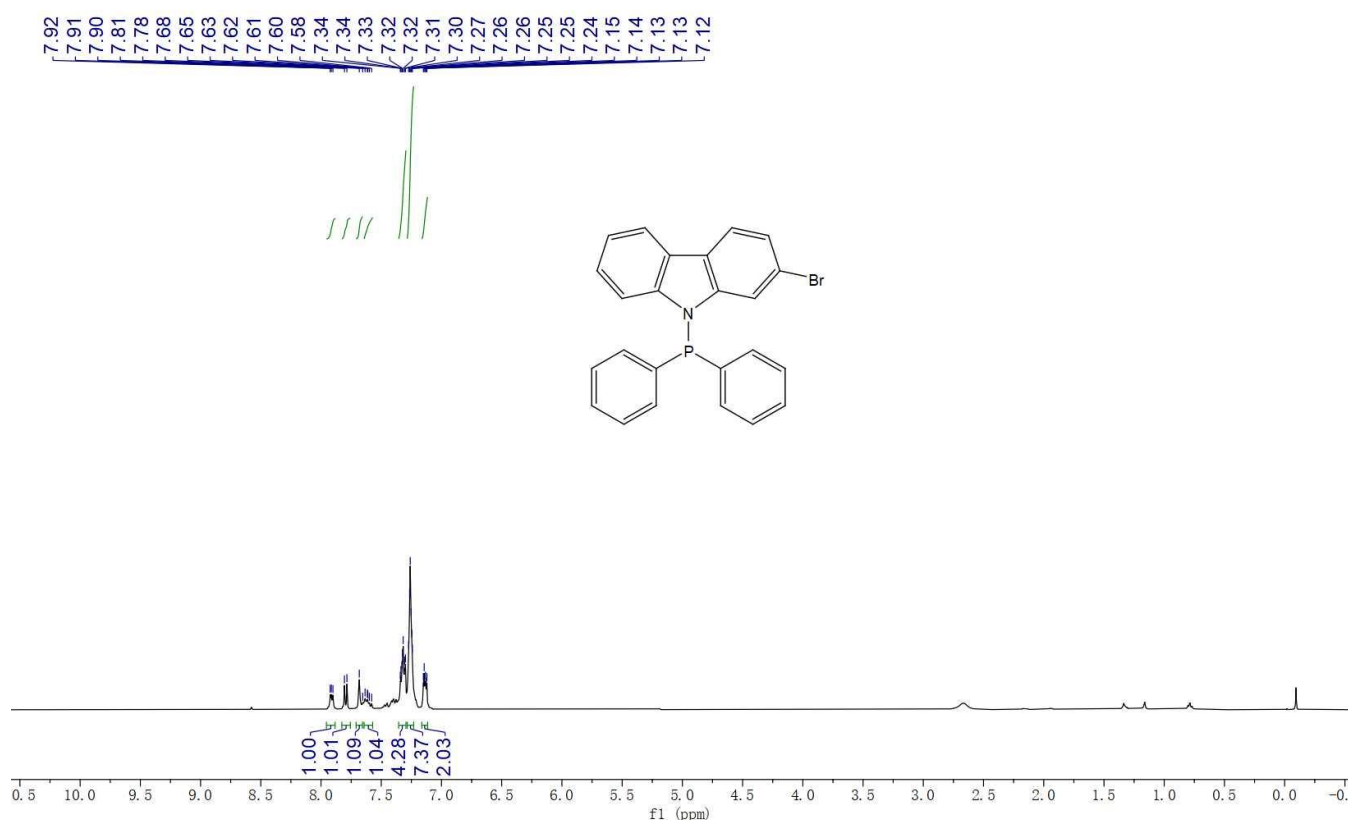

133.88  
133.75  
131.40  
131.21  
129.51  
128.82  
128.76  
125.97  
123.95  
121.12  
121.09  
120.09  
116.65  
116.50  
114.14  
114.04

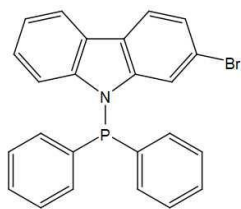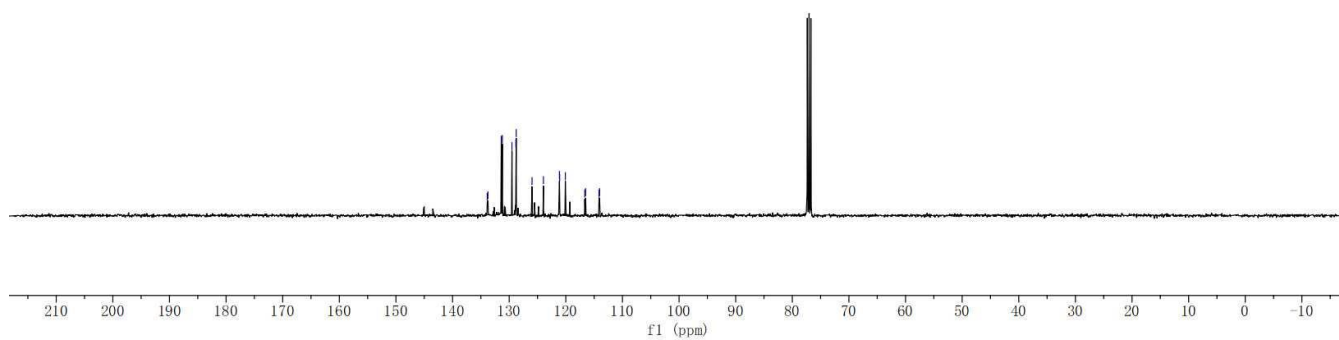

-33.68

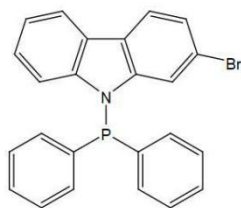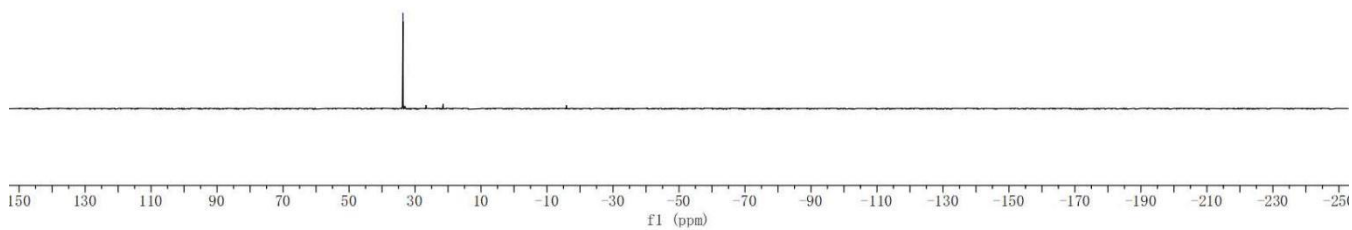

$^1\text{H}$ ,  $^{13}\text{C}$  and  $^{31}\text{P}$  NMR spectra of L1



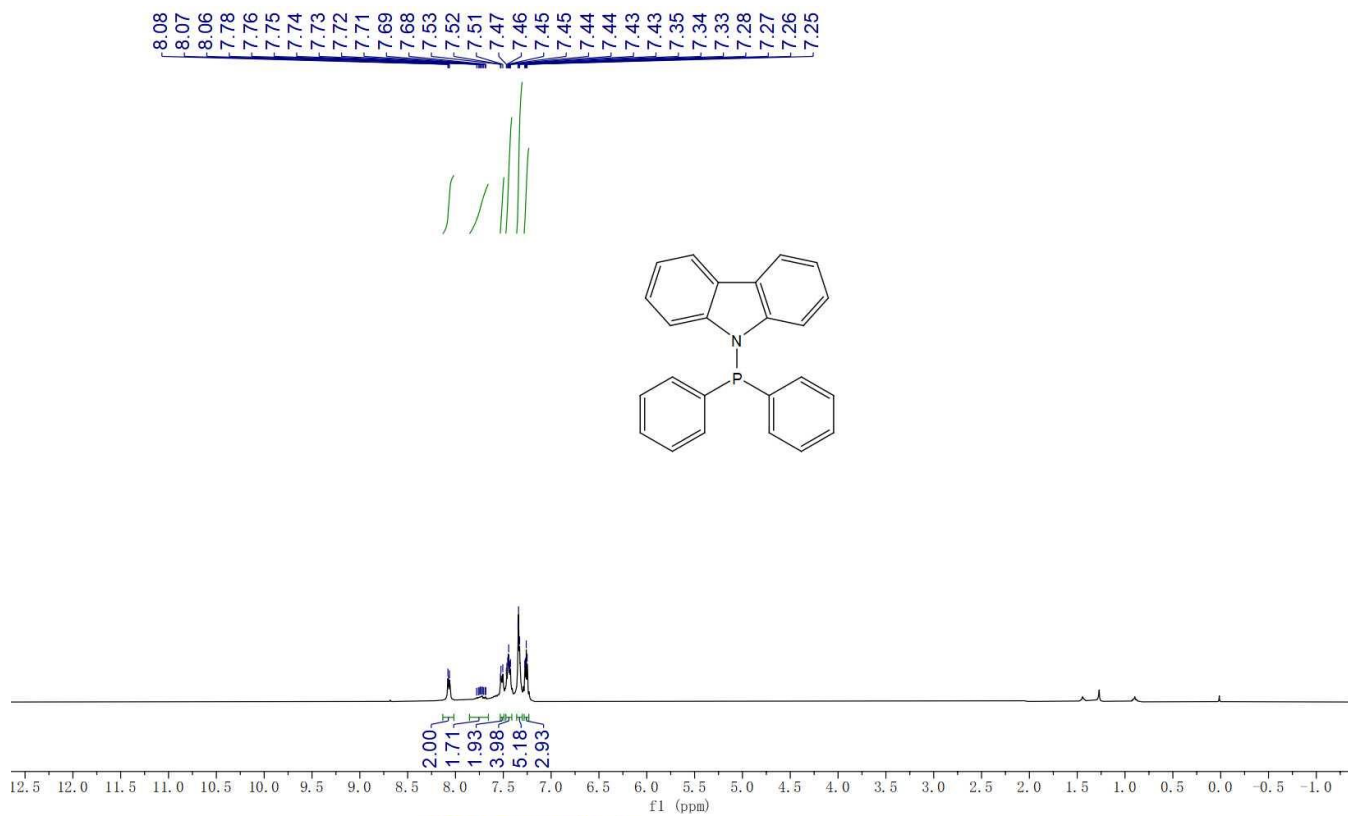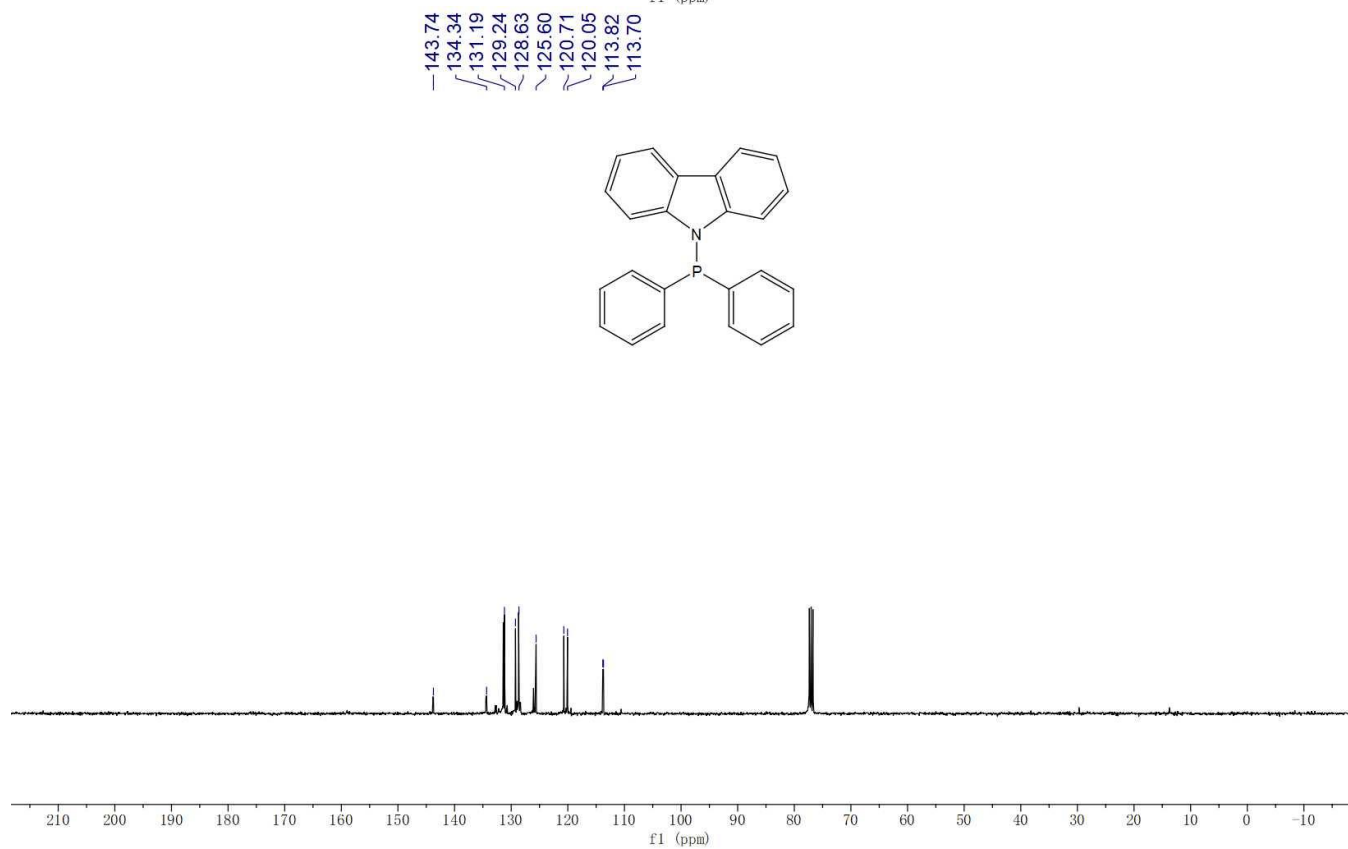

-31.87

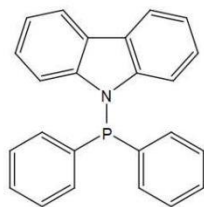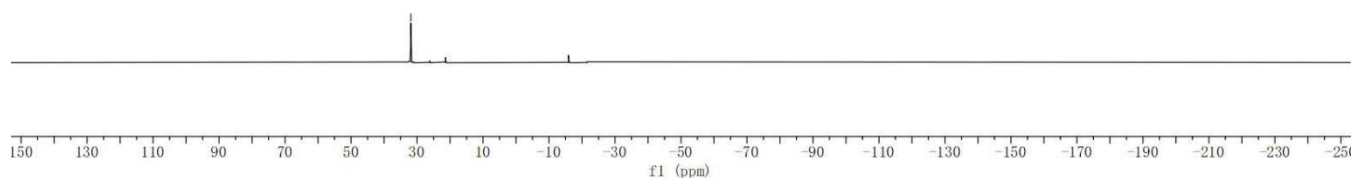

$^1\text{H}$ ,  $^{13}\text{C}$  and  $^{31}\text{P}$  NMR spectra of L2

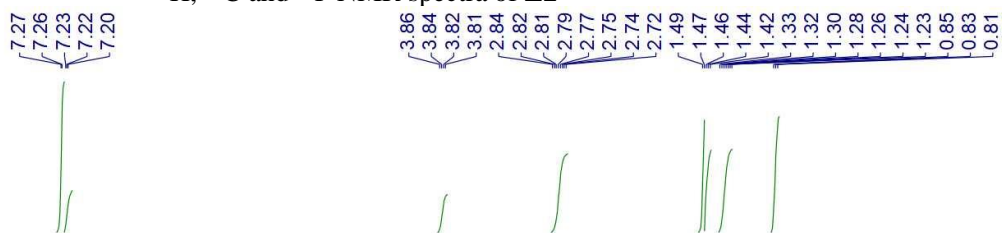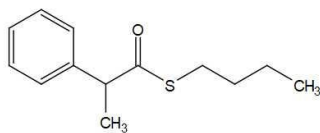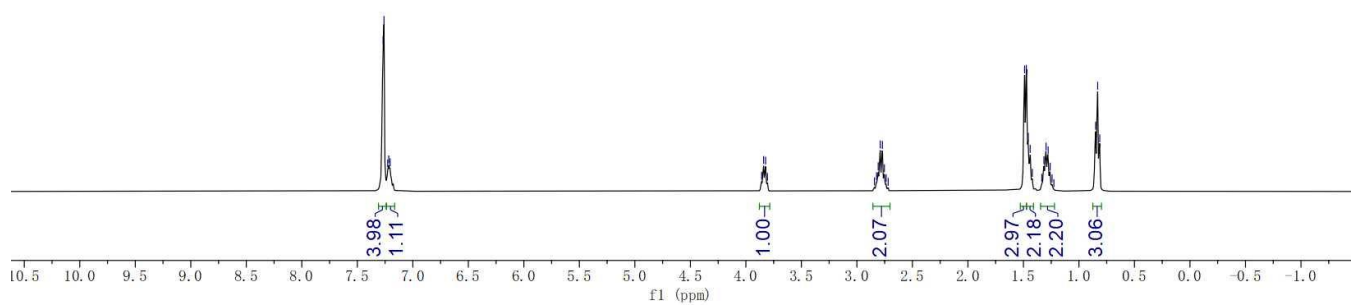

-201.16

-140.09  
-128.68  
-127.94  
-127.41

-54.33

-31.54  
-28.82  
-21.99  
-18.51  
-13.59

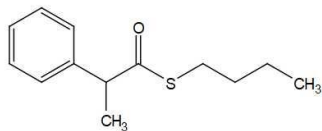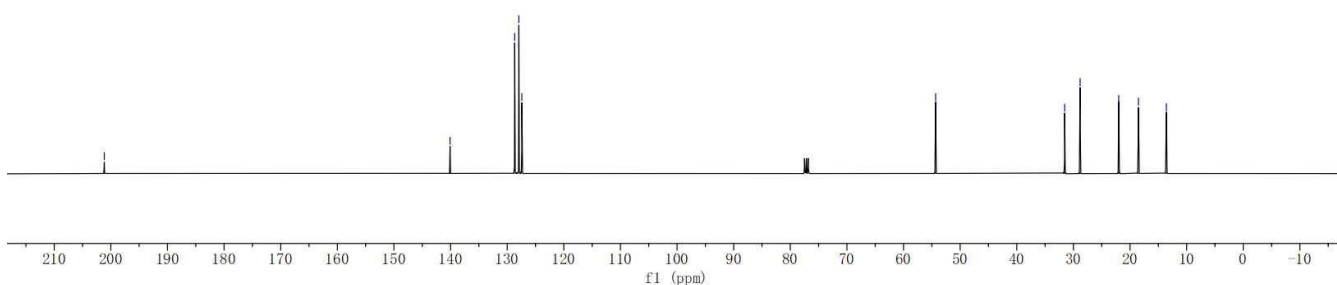

<sup>1</sup>H and <sup>13</sup>C NMR spectra of 3a

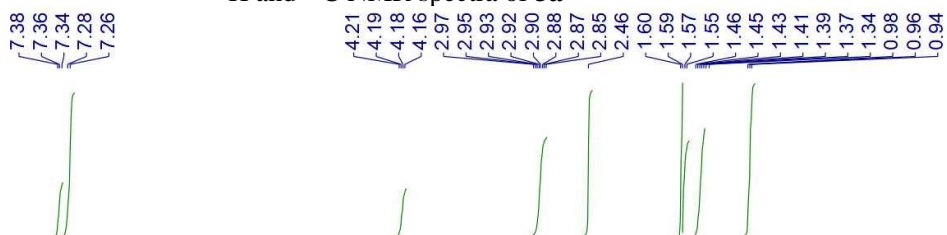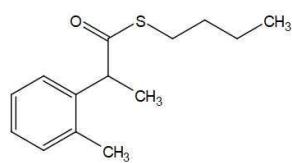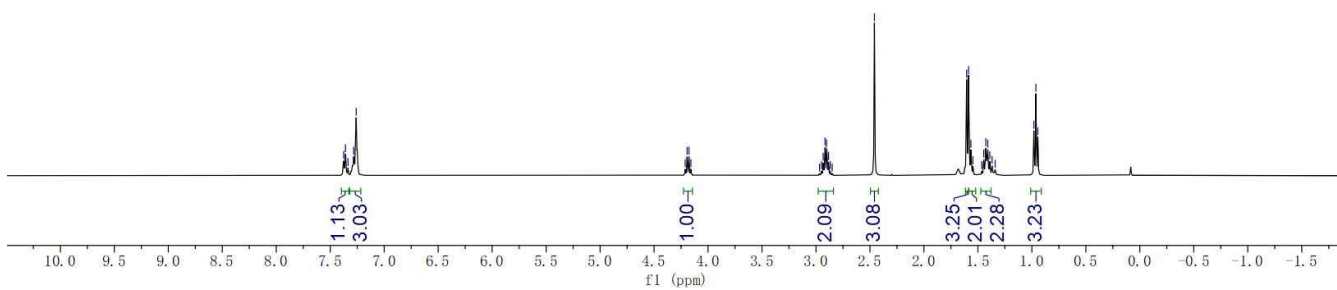

-201.72

138.35  
136.17  
130.54  
127.28  
127.20  
126.44

-50.11

31.52  
28.76  
21.96  
19.86  
18.10  
13.56

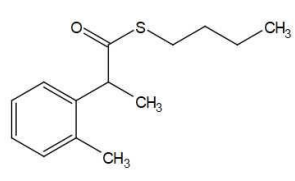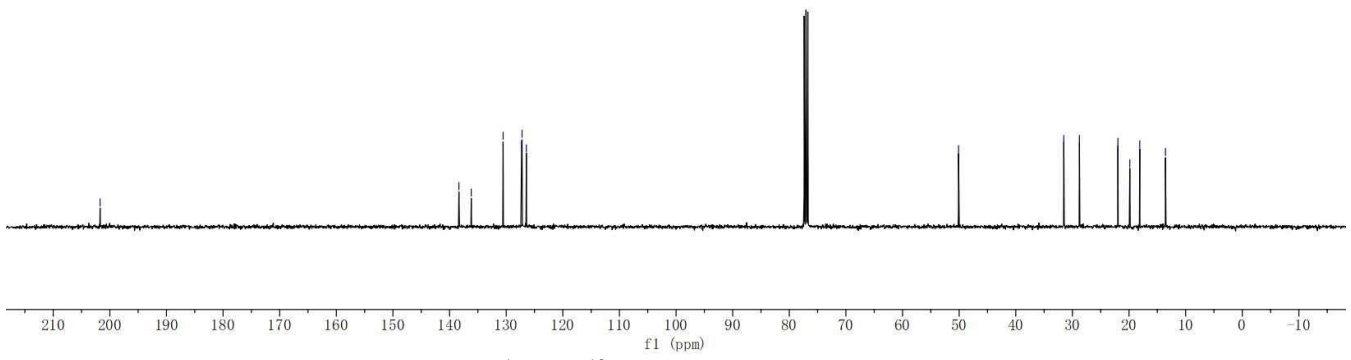

<sup>1</sup>H and <sup>13</sup>C NMR spectra of 3b

7.24  
7.22  
7.20  
7.12  
7.10  
7.08

3.88  
3.86  
3.84  
3.82  
2.88  
2.87  
2.85  
2.84  
2.83  
2.82  
2.80  
2.79  
2.35  
1.53  
1.51  
1.50  
1.48  
1.38  
1.36  
1.34  
1.32  
0.91  
0.89  
0.87

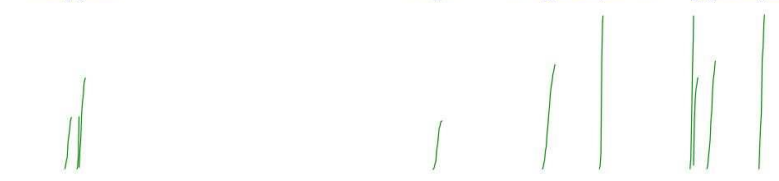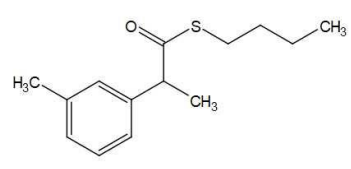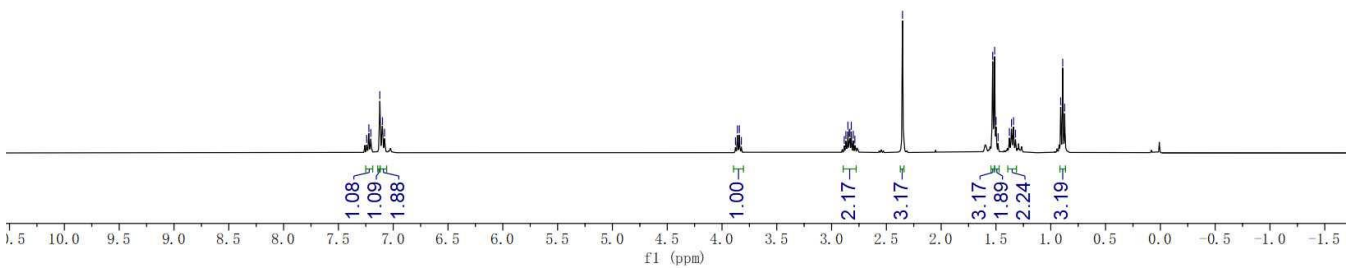

-201.40

139.99  
138.29  
128.59  
128.53  
128.15  
124.95

-54.25

31.49  
28.80  
21.98  
21.44  
18.49  
13.56

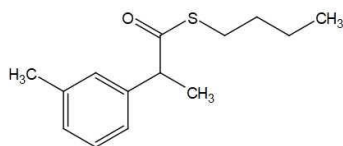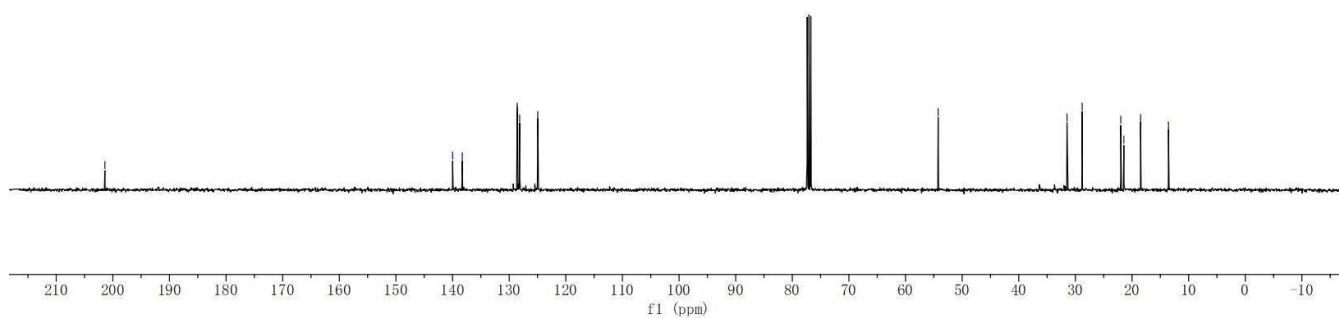

<sup>1</sup>H and <sup>13</sup>C NMR spectra of 3c

7.22  
7.20  
7.16  
7.14

3.88  
3.86  
3.84  
3.82  
2.87  
2.86  
2.84  
2.83  
2.82  
2.81  
2.80  
2.34  
1.53  
1.51  
1.49  
1.47  
1.37  
1.36  
1.34  
1.32  
0.91  
0.89  
0.87

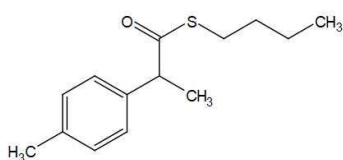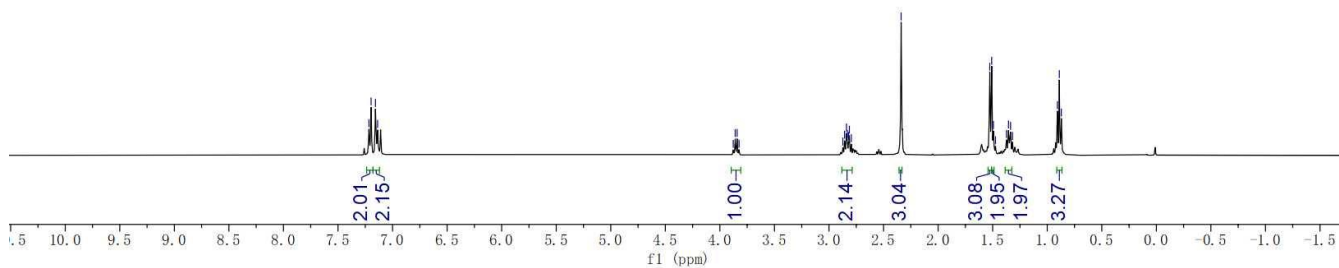

—201.54

137.08  
129.37  
128.36  
127.79

—53.91

31.50  
28.79  
21.98  
21.09  
18.46  
13.56

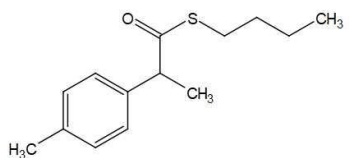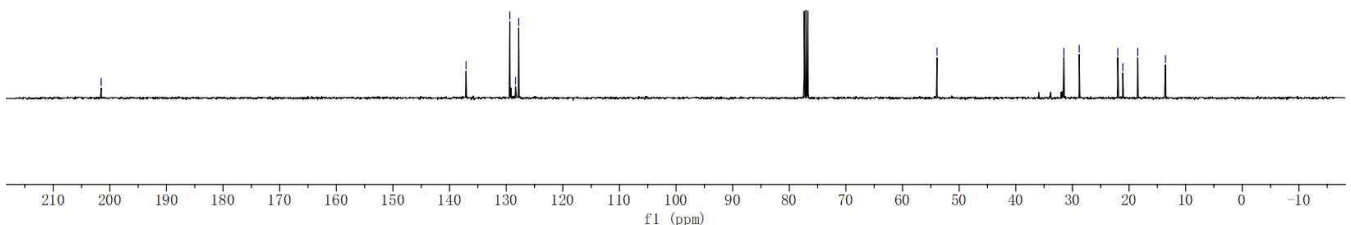

<sup>1</sup>H and <sup>13</sup>C NMR spectra of 3d

7.26  
7.24  
6.97  
6.95  
6.93  
6.88  
6.86

4.28  
4.26  
4.24  
4.23  
3.82  
2.83  
2.81  
2.79  
1.52  
1.50  
1.49  
1.47  
1.37  
1.35  
1.33  
1.33  
1.31  
0.90  
0.88  
0.86

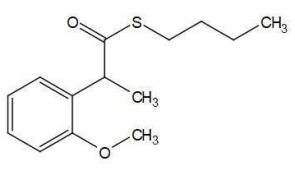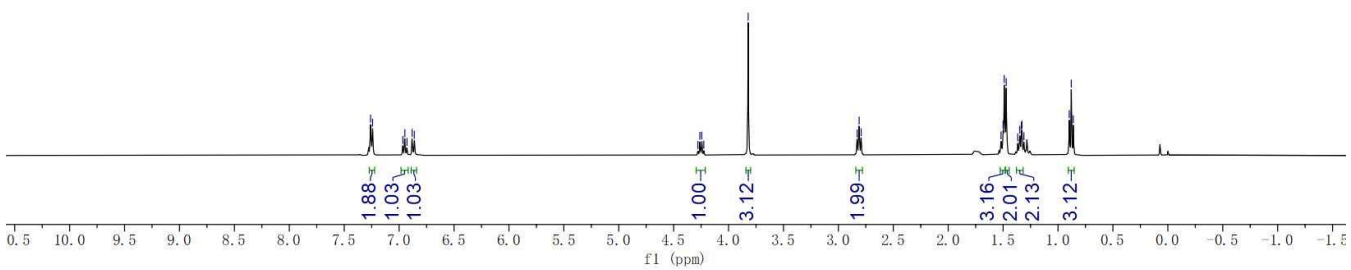

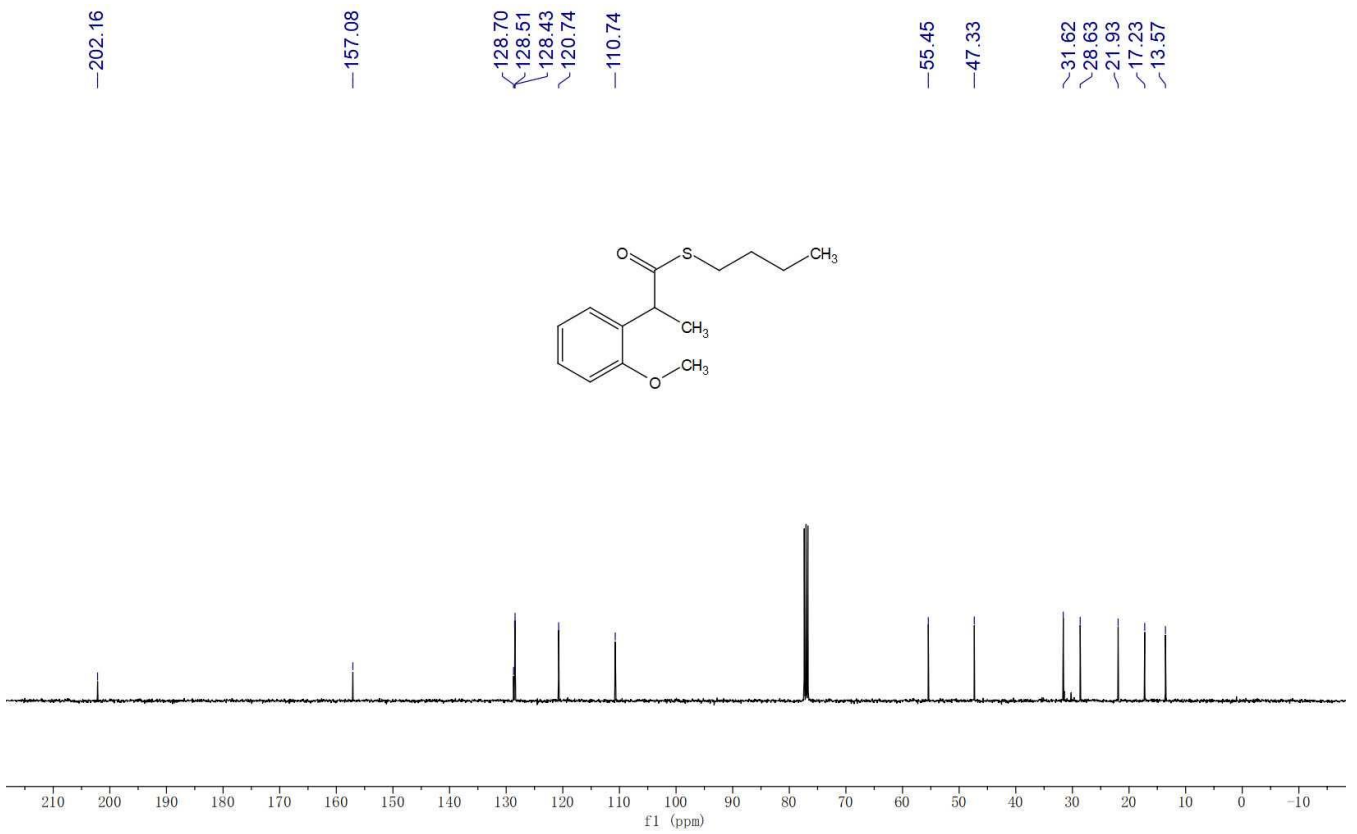

<sup>1</sup>H and <sup>13</sup>C NMR spectra of **3e**

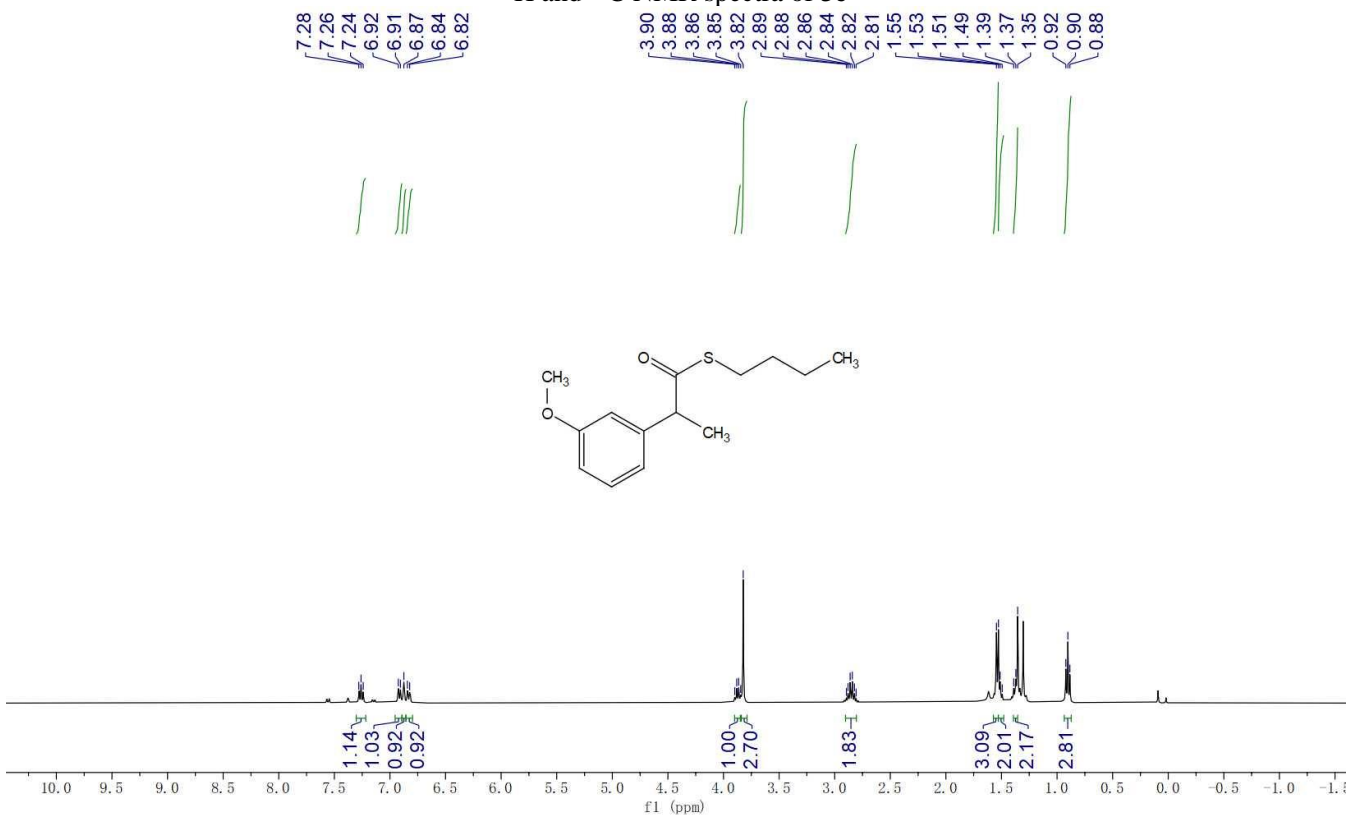

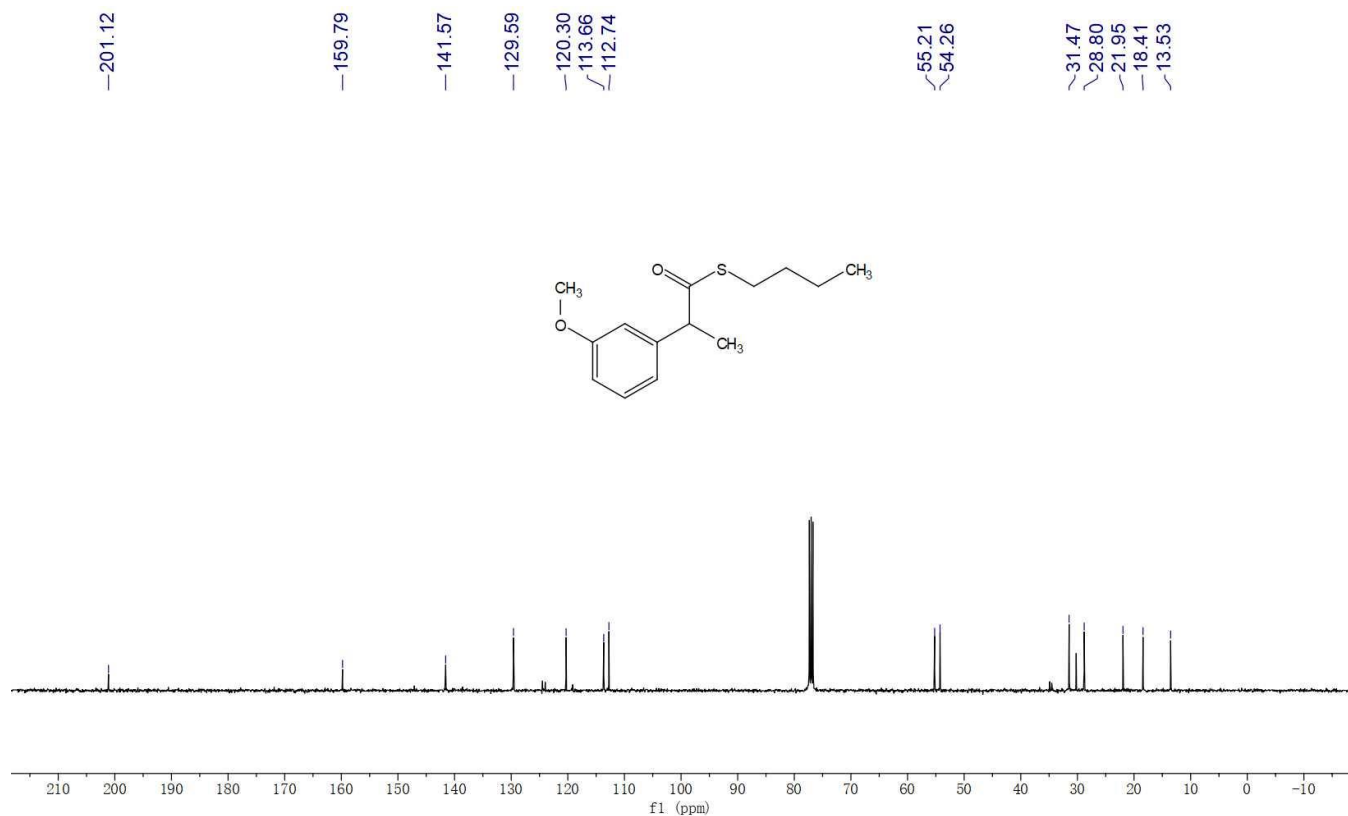

<sup>1</sup>H and <sup>13</sup>C NMR spectra of 3f

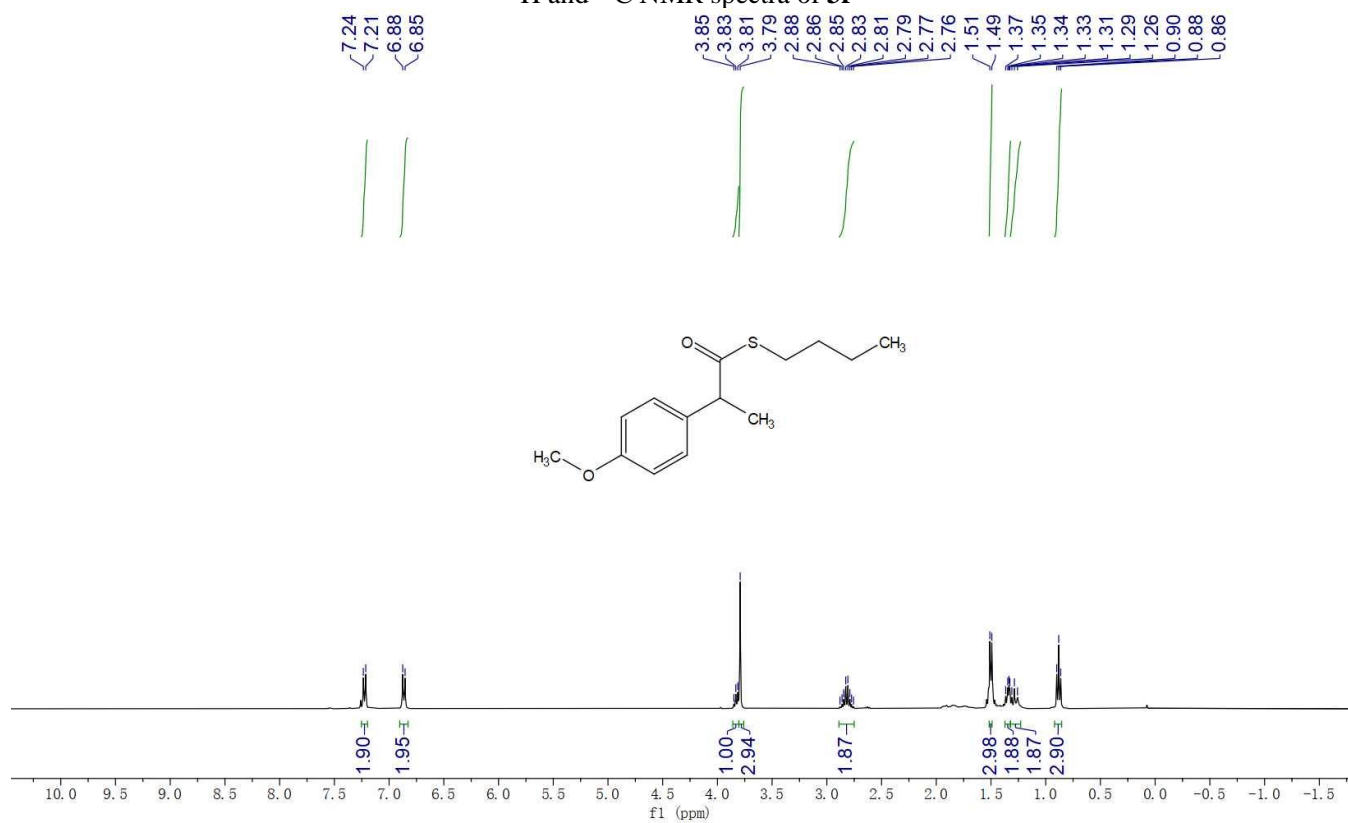



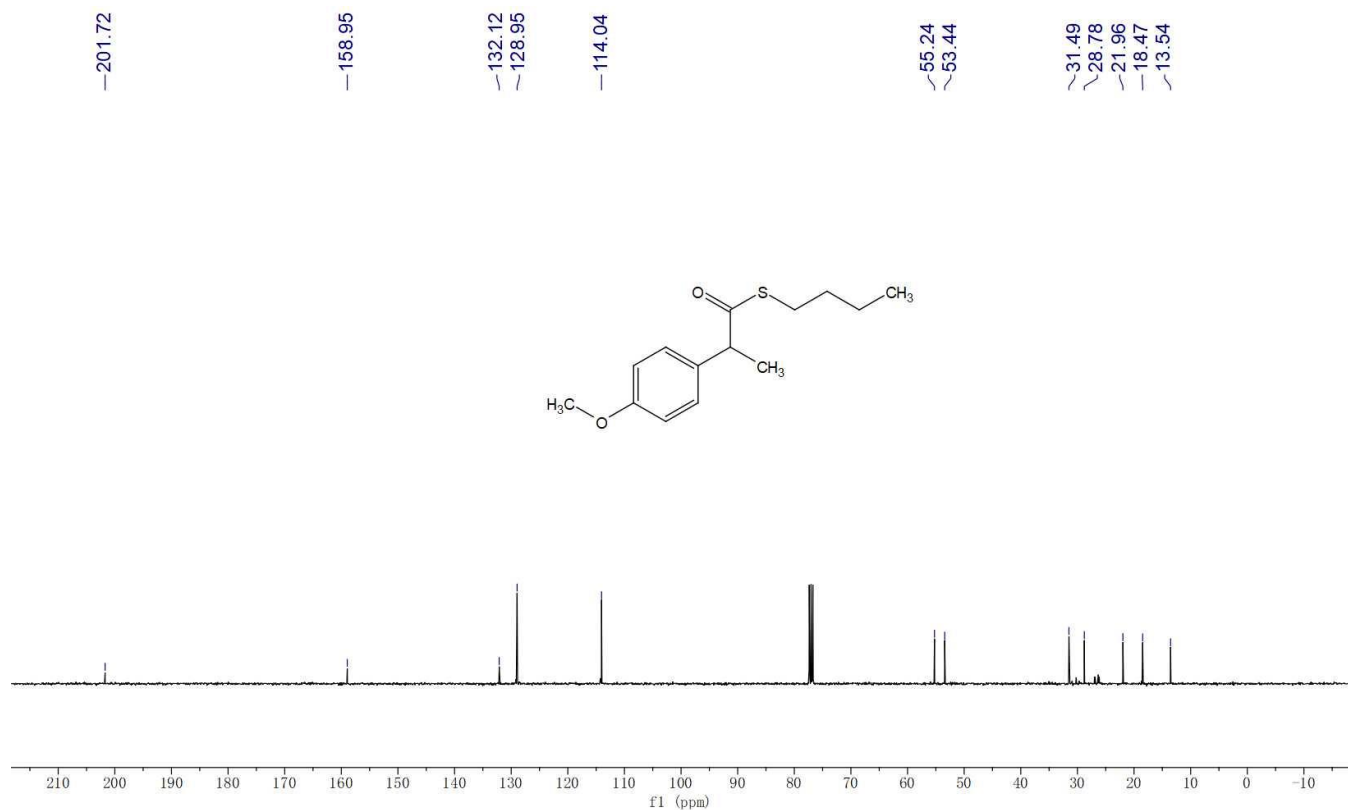

<sup>1</sup>H and <sup>13</sup>C NMR spectra of 3g

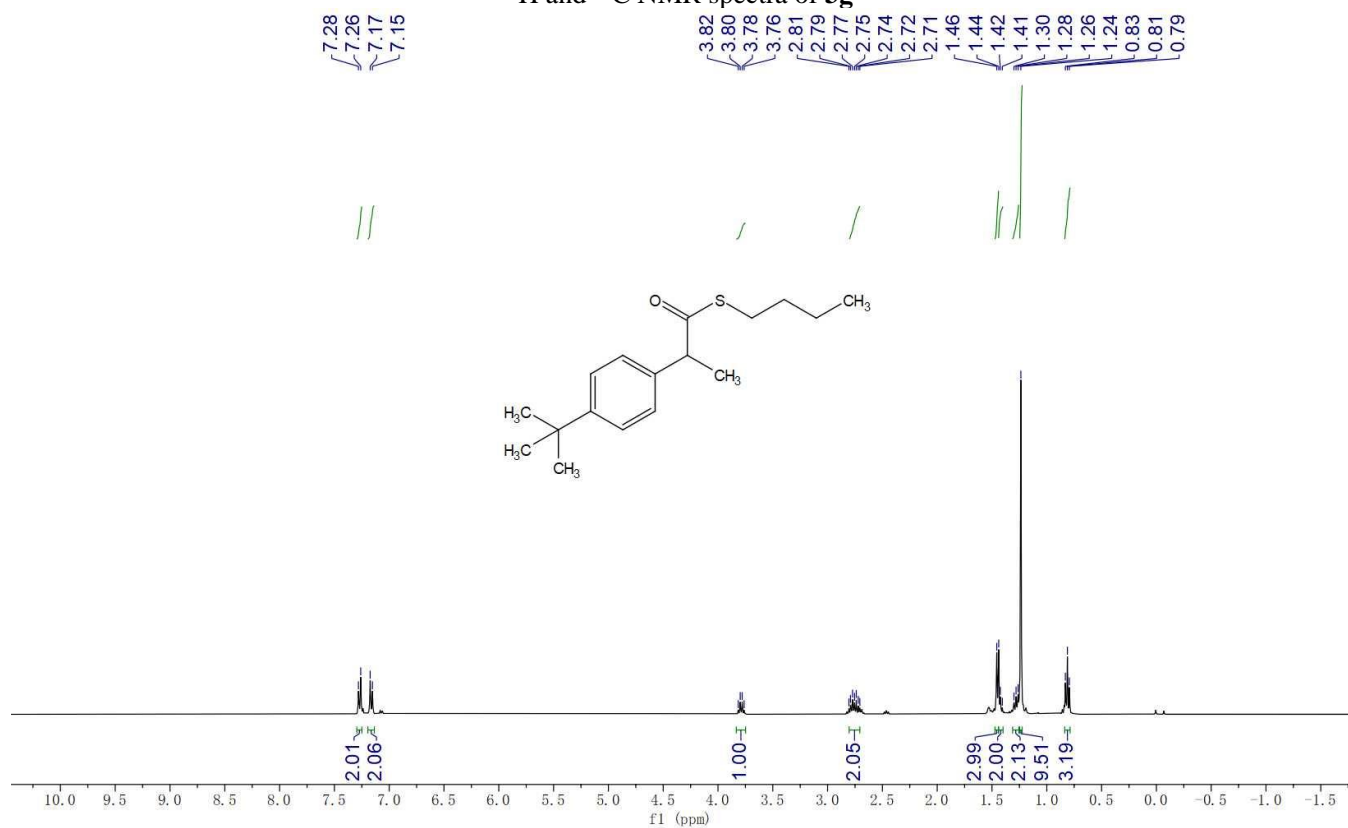

-201.52

-150.22

-136.91

-127.48

-125.55

-53.83

34.46

31.50

31.35

28.79

21.98

18.47

13.55

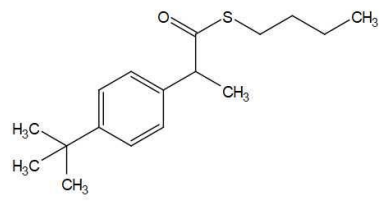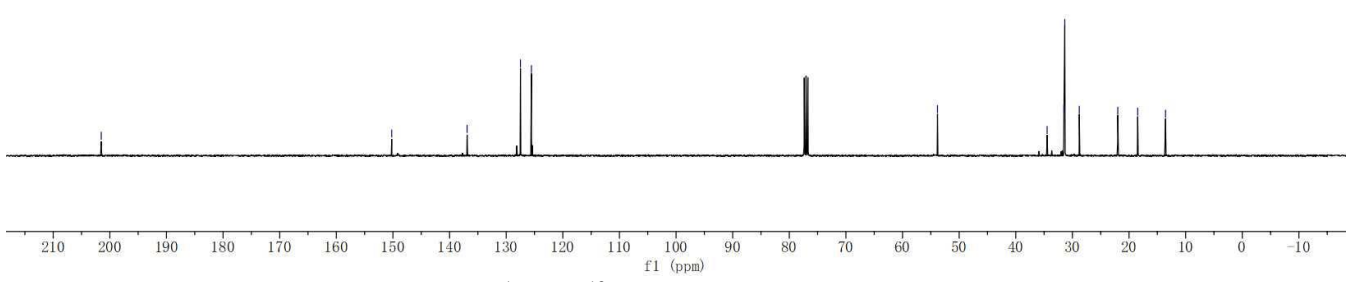

<sup>1</sup>H and <sup>13</sup>C NMR spectra of **3h**

7.60  
7.58  
7.56  
7.46  
7.44  
7.42  
7.41  
7.39  
7.36  
7.35  
7.33

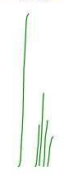

3.97  
3.95  
3.93  
3.92  
2.93  
2.91  
2.89  
2.88  
2.85  
2.84  
2.82  
2.80  
1.59  
1.57  
1.54  
1.52  
1.50  
1.41  
1.39  
1.37  
1.35  
1.34  
0.92  
0.88

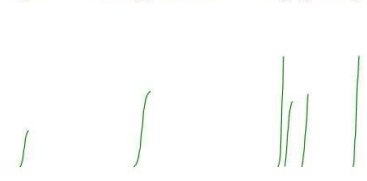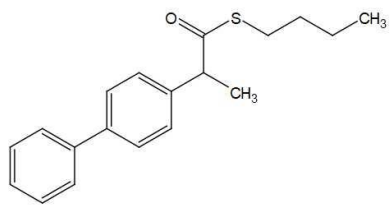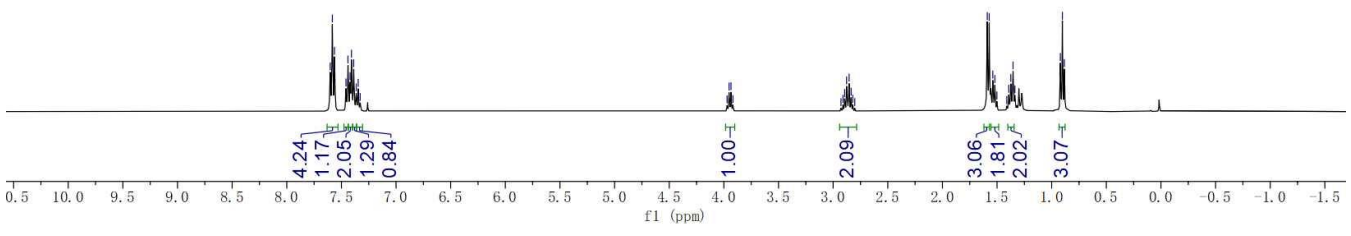

-201.29

140.76  
140.35  
139.07  
128.78  
128.31  
127.40  
127.31  
127.10

-53.97

31.49  
28.87  
22.00  
18.52  
13.58

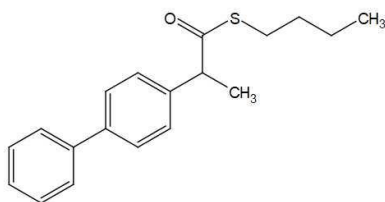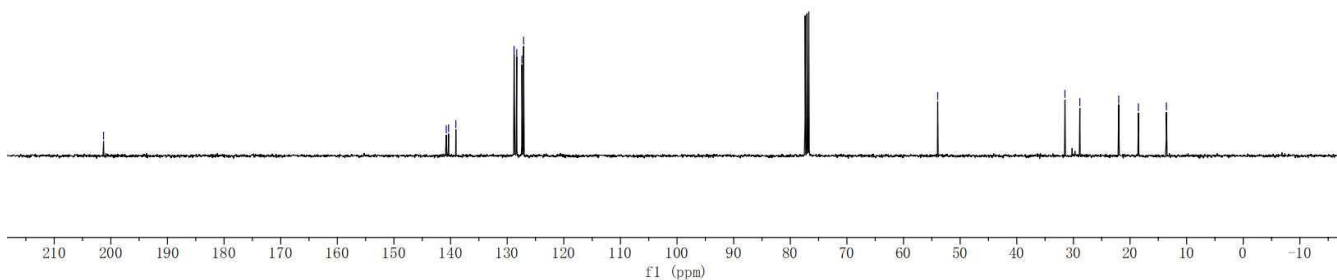

<sup>1</sup>H and <sup>13</sup>C NMR spectra of 3i

8.07  
8.05  
7.89  
7.87  
7.81  
7.79  
7.57  
7.56  
7.55  
7.54  
7.54  
7.53  
7.52  
7.52  
7.51  
7.50  
7.50  
7.49  
7.48  
4.70  
4.69  
4.67  
4.65  
2.85  
2.83  
2.81  
1.71  
1.70  
1.52  
1.50  
1.48  
1.47  
1.45  
1.34  
1.32  
1.31  
1.30  
1.29  
1.28  
0.88  
0.86  
0.84

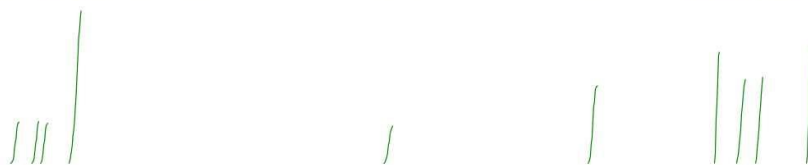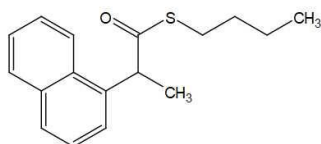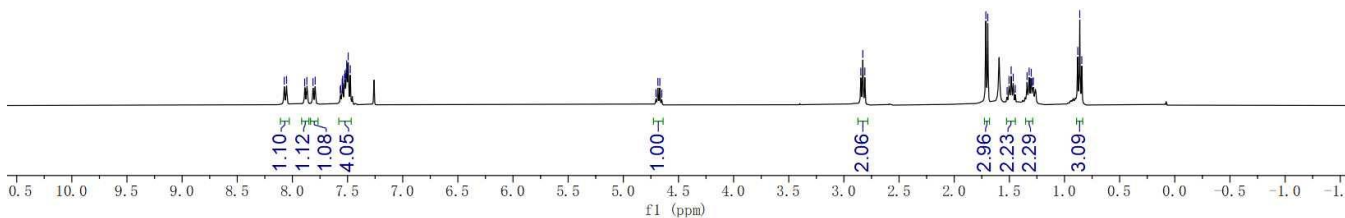

-202.02

136.01  
134.00  
131.60  
129.05  
128.11  
126.41  
125.68  
125.55  
125.36  
123.18

-50.00

31.44  
28.83  
21.90  
18.42  
13.52

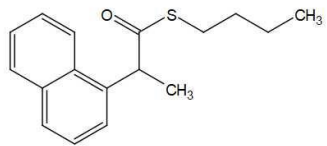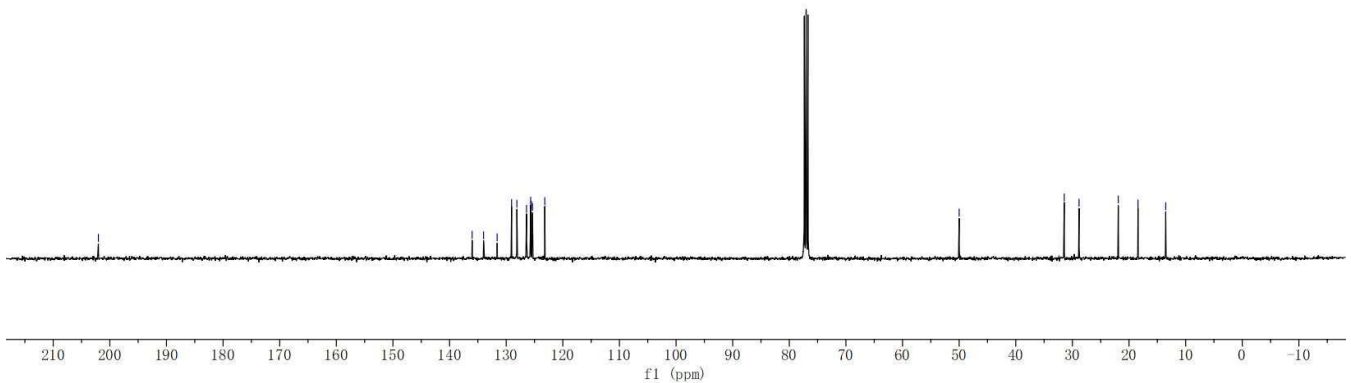

<sup>1</sup>H and <sup>13</sup>C NMR spectra of **3j**

7.82  
7.80  
7.76  
7.49  
7.47  
7.47  
7.46  
7.45  
7.44  
7.43  
7.42  
4.07  
4.06  
4.04  
4.02  
2.90  
2.88  
2.86  
2.84  
2.82  
2.81  
2.79  
2.77  
1.62  
1.61  
1.53  
1.52  
1.50  
1.48  
1.46  
1.37  
1.35  
1.34  
1.32  
1.30  
0.88  
0.87  
0.85

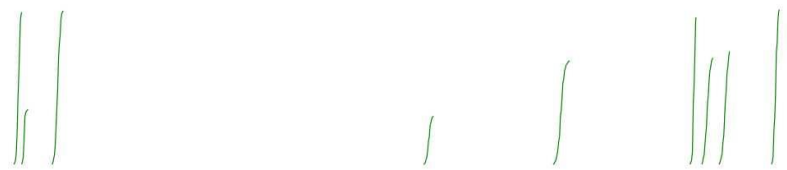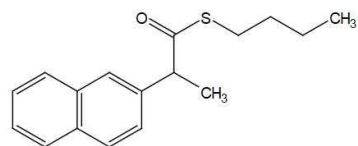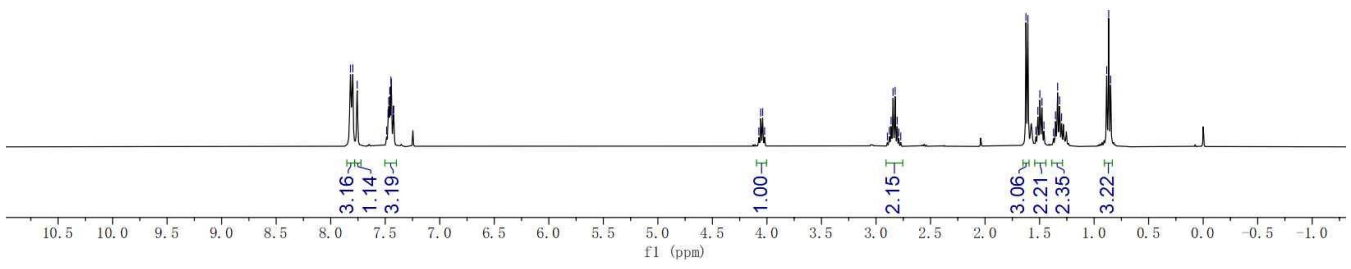

-201.31

137.52  
133.49  
132.75  
128.37  
127.90  
127.68  
126.78  
126.20  
125.93

-54.42

31.48  
28.86  
21.97  
18.50  
13.55

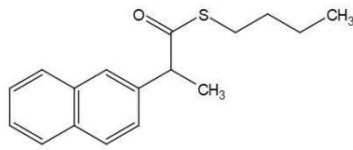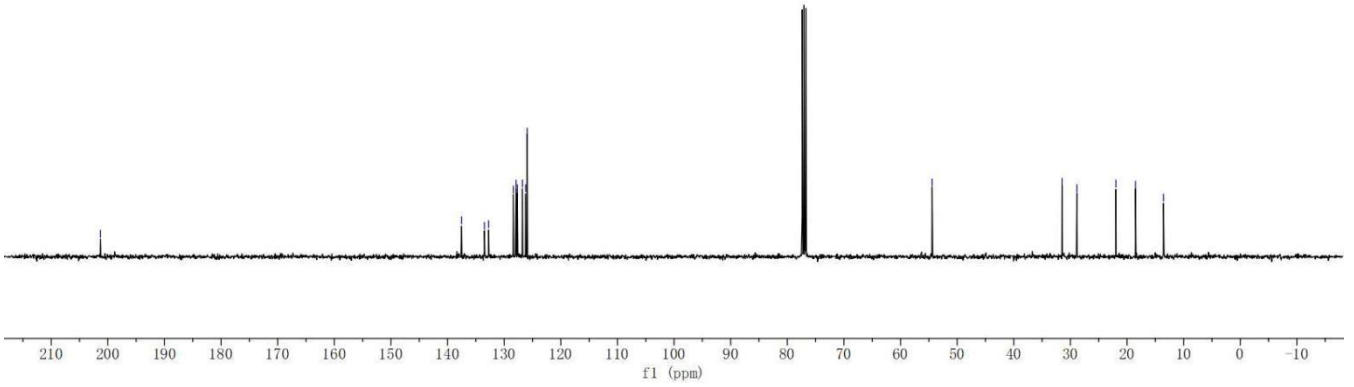

<sup>1</sup>H and <sup>13</sup>C NMR spectra of 3k

7.22  
7.20  
7.19  
7.18  
6.96  
6.94  
6.91

3.81  
3.79  
3.78  
3.76  
2.81  
2.80  
2.78  
2.77  
2.76  
2.75  
2.74  
2.73  
2.72  
2.70  
1.44  
1.43  
1.41  
1.40  
1.30  
1.29  
1.28  
1.27  
1.26  
1.25  
1.24  
0.83  
0.81  
0.79

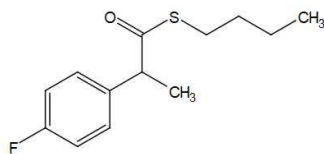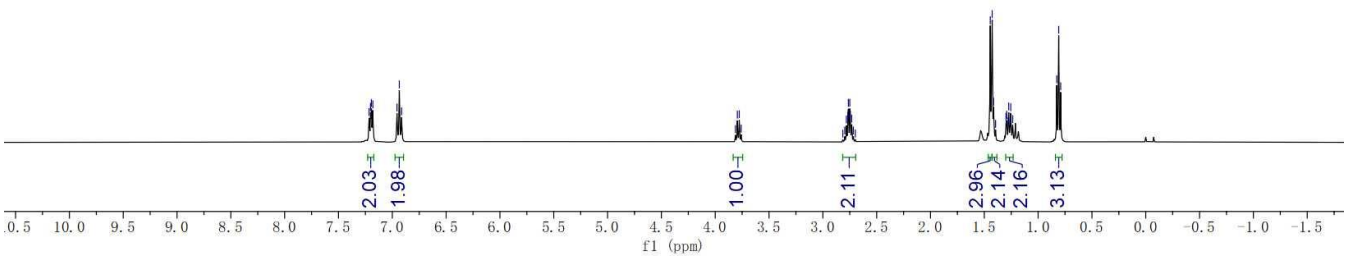

~201.18

~163.40  
~160.96

~135.76  
~135.73  
~129.47  
~129.39

~115.58  
~115.36

~53.44

~31.44  
~28.82  
~21.92  
~18.57  
~13.50

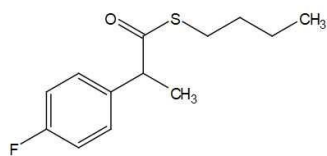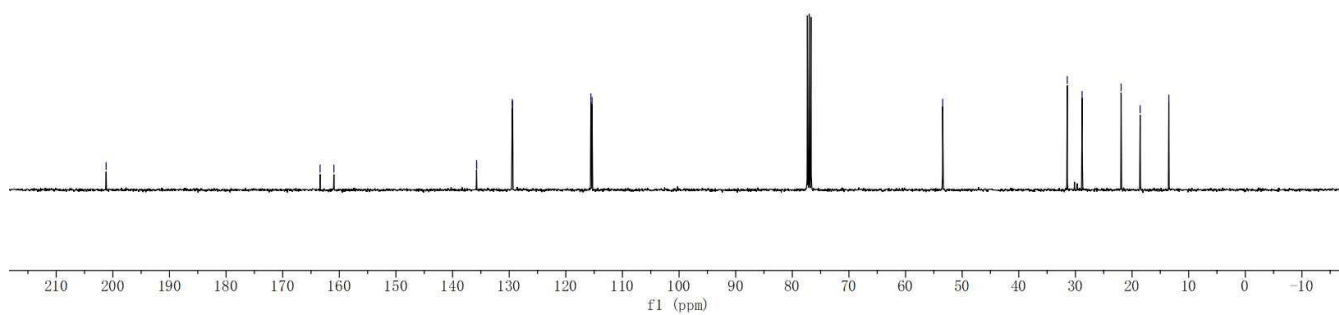

~115.29

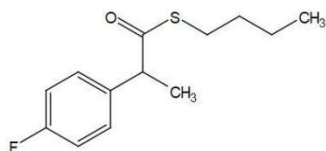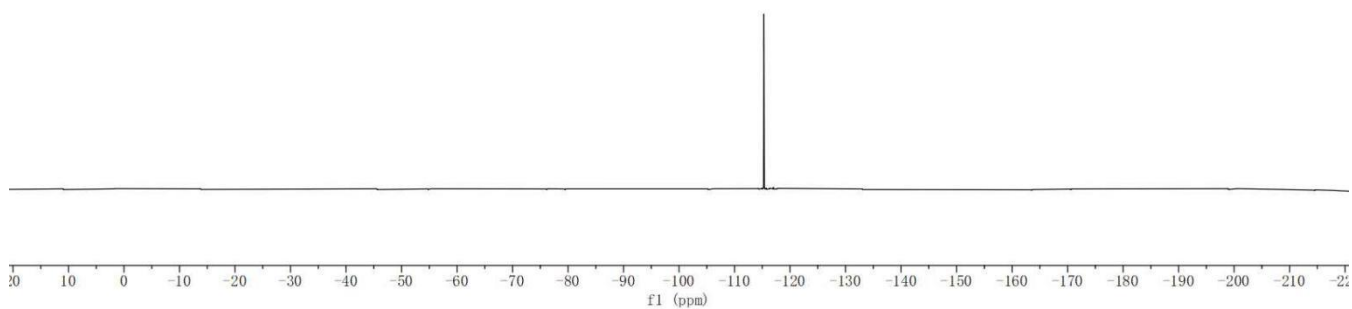

$^1\text{H}$ ,  $^{13}\text{C}$  and  $^{19}\text{F}$  NMR spectra of **31**

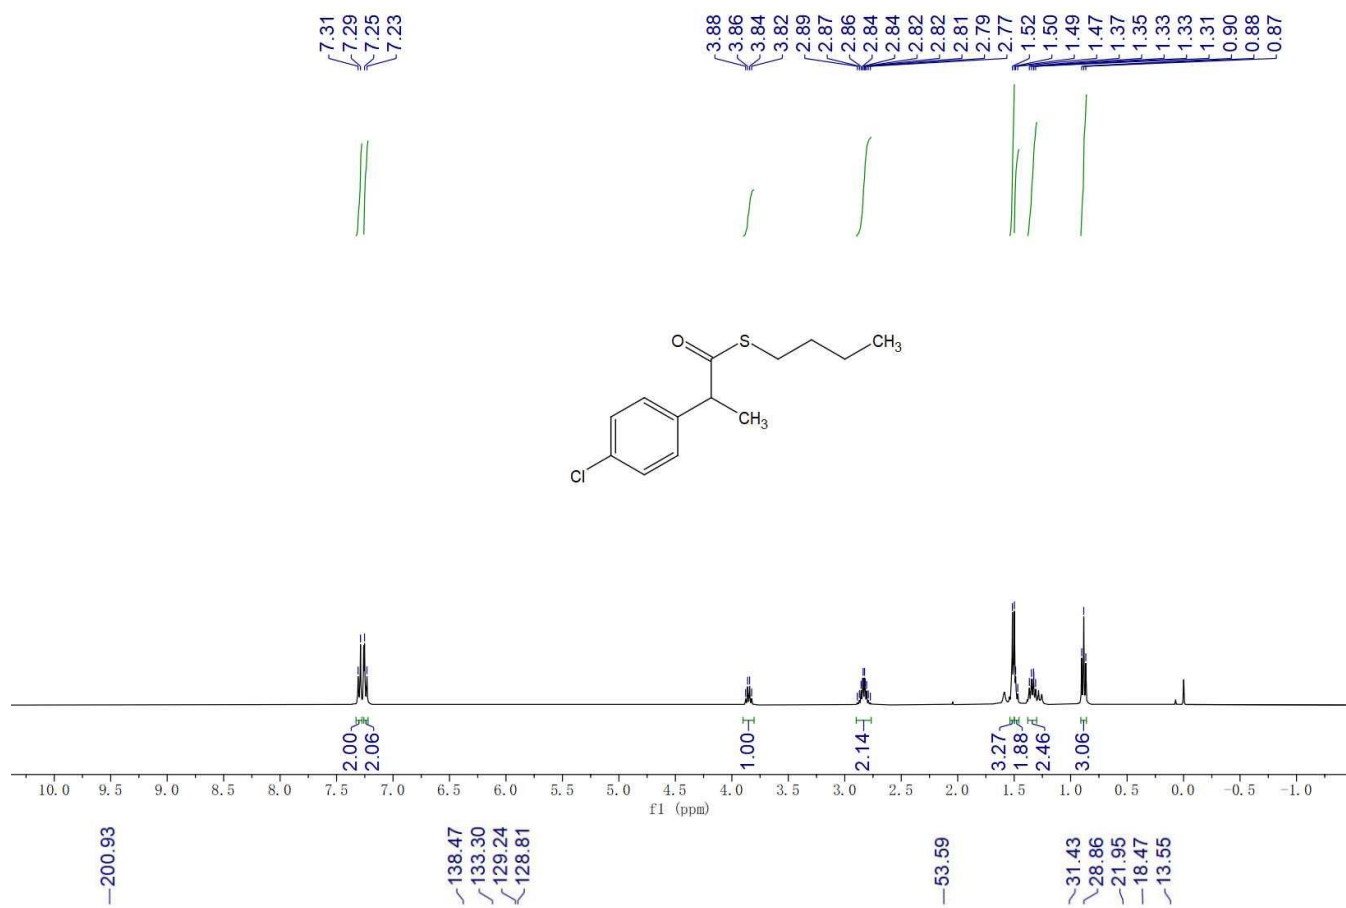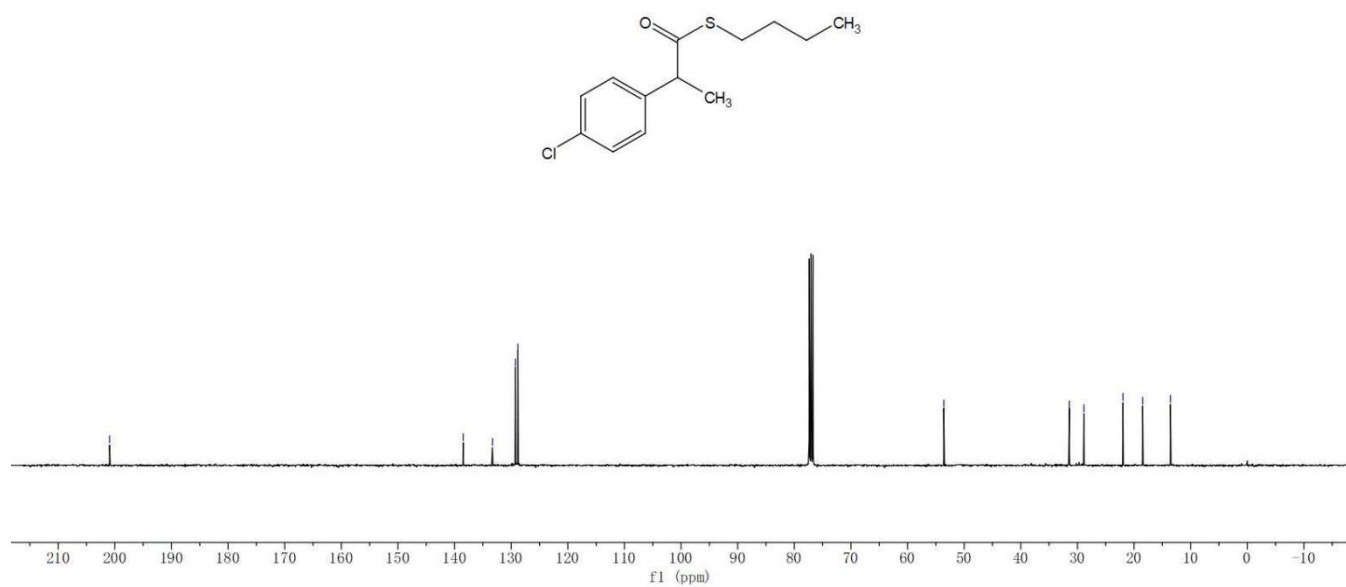

<sup>1</sup>H and <sup>13</sup>C NMR spectra of **3m**

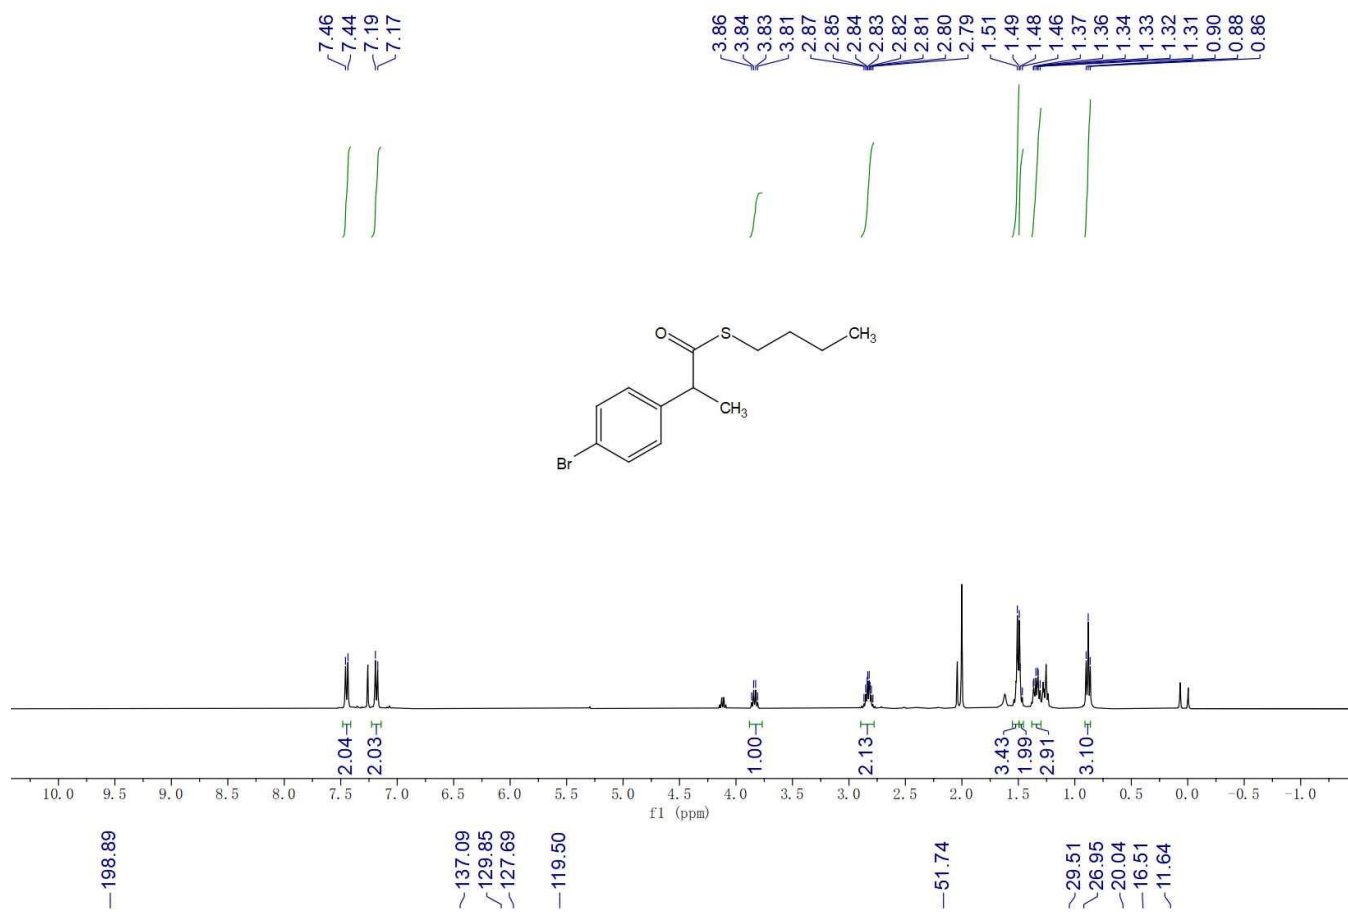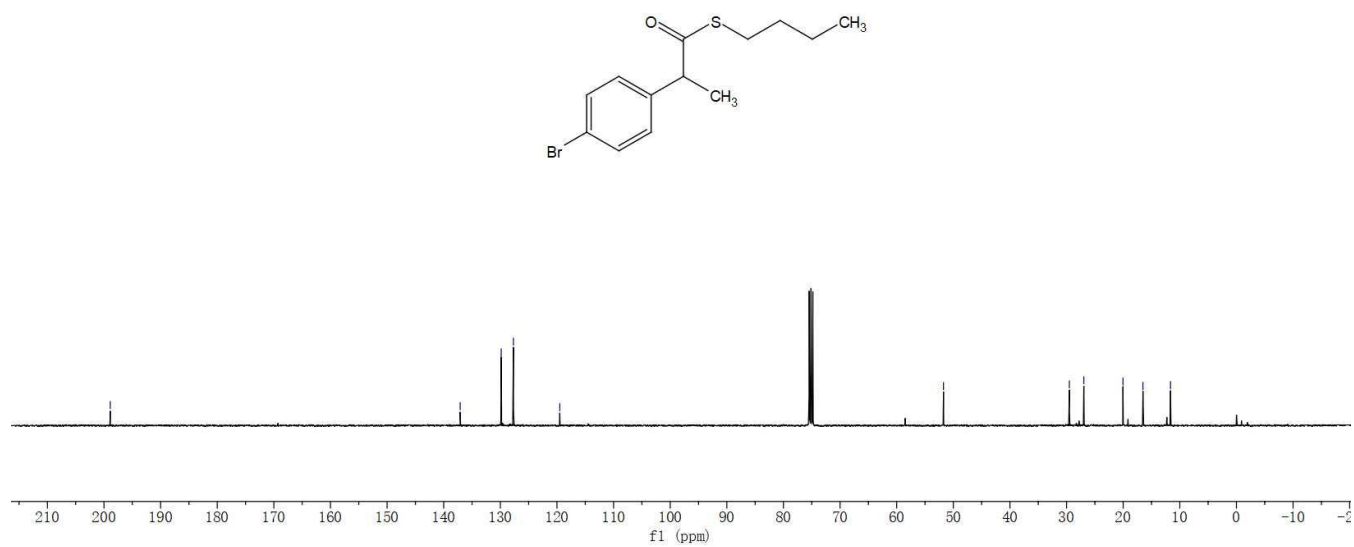

<sup>1</sup>H and <sup>13</sup>C NMR spectra of **3n**



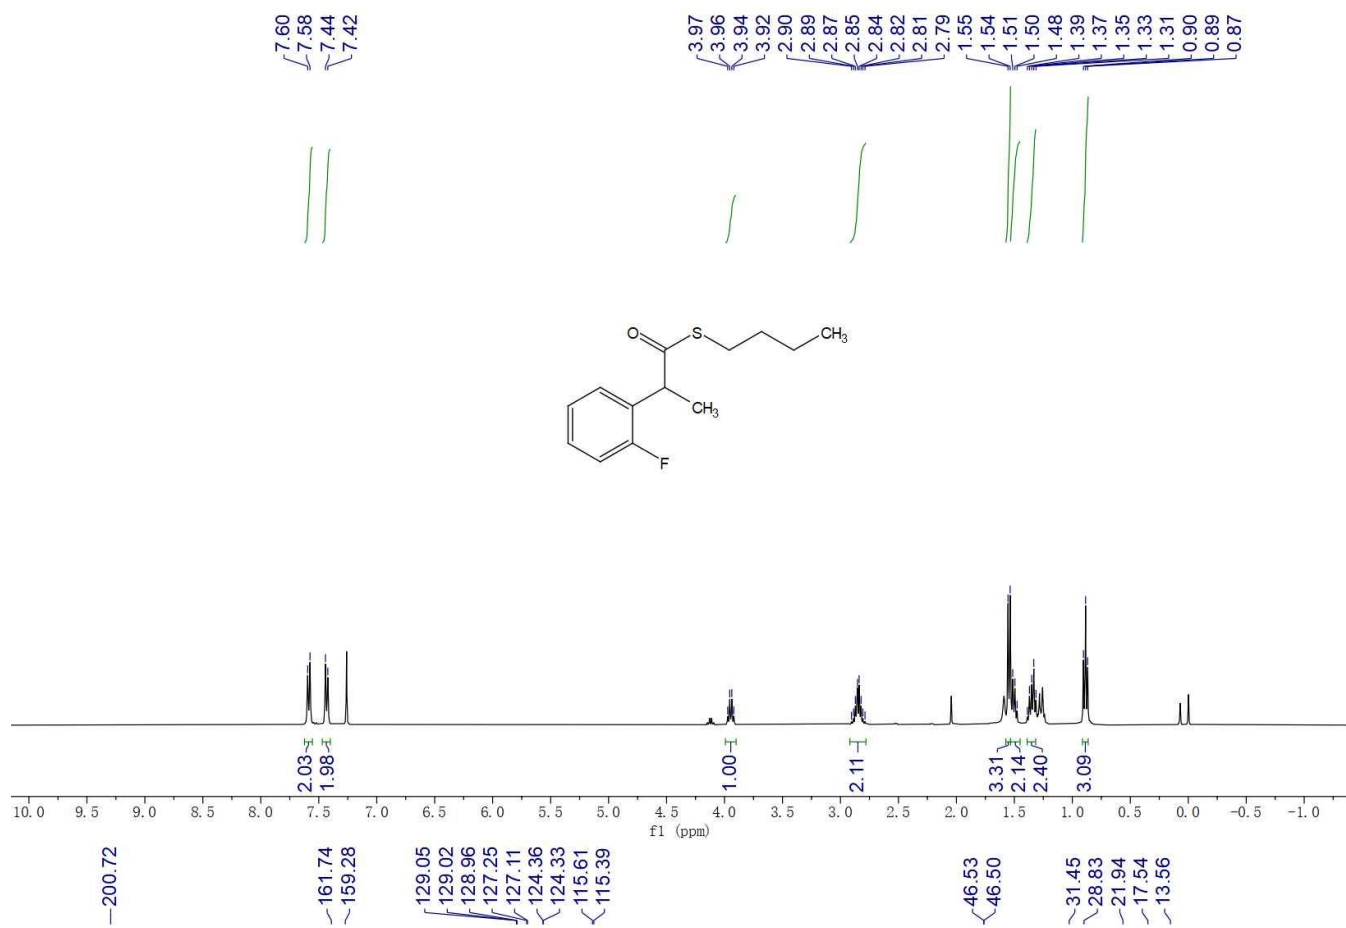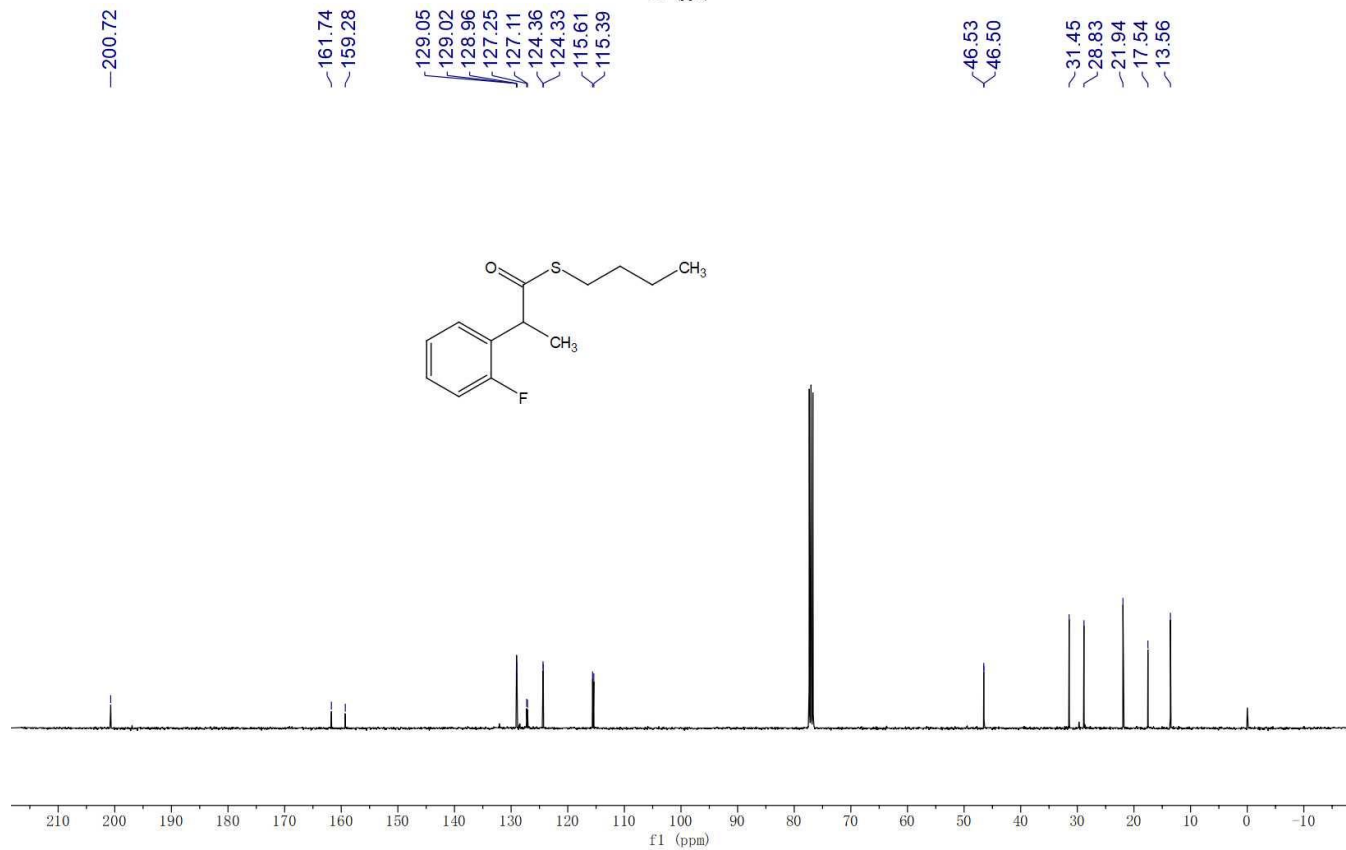

---117.51

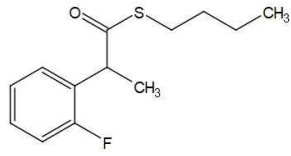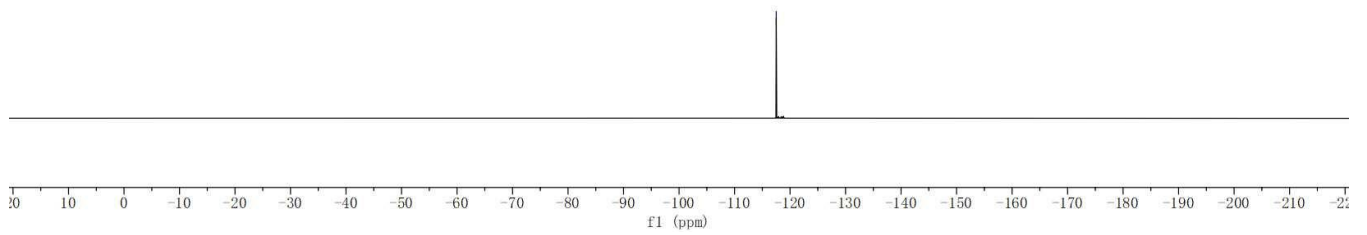

<sup>1</sup>H, <sup>13</sup>C and <sup>19</sup>F NMR spectra of 30

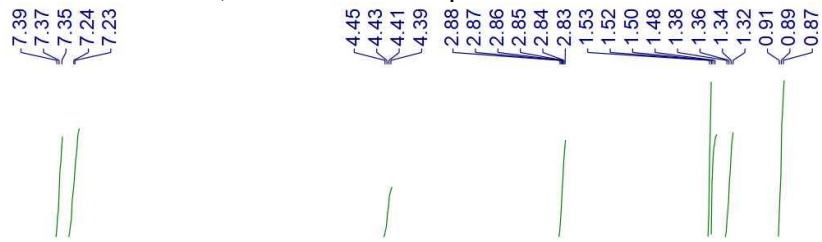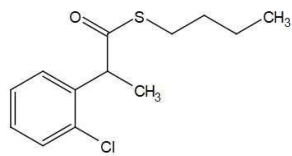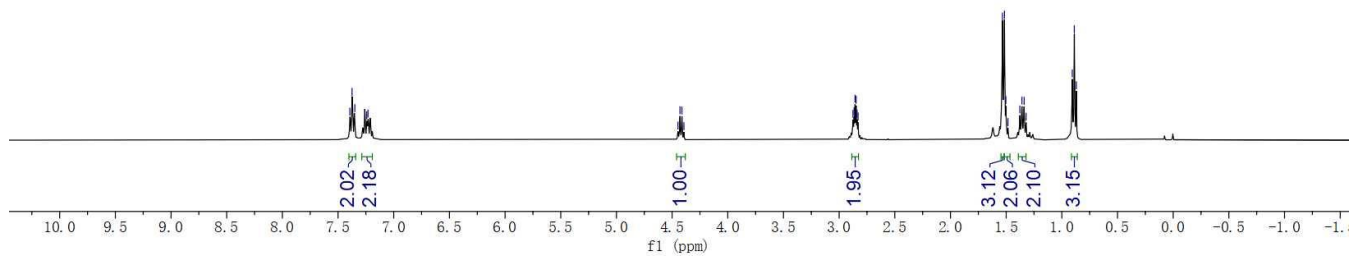

-200.74

137.72  
134.17  
129.68  
128.86  
128.56  
127.15

-50.22

31.45  
28.83  
21.93  
17.84  
13.53

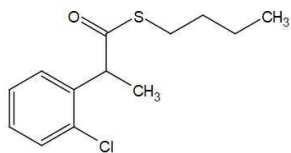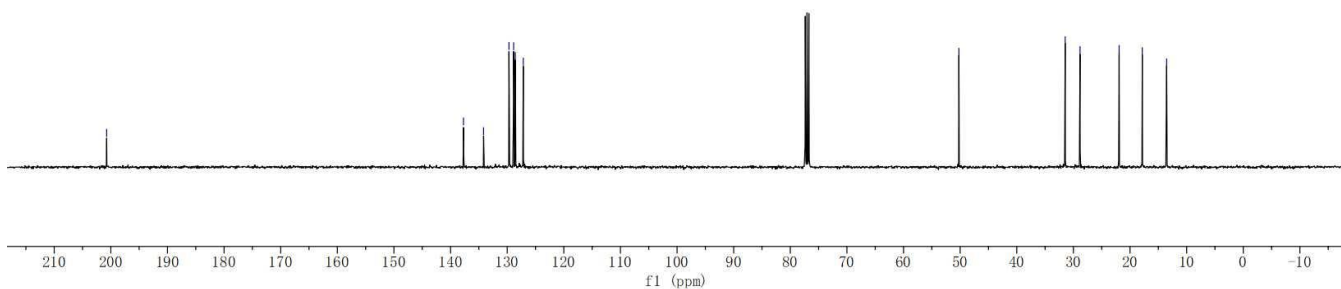

<sup>1</sup>H and <sup>13</sup>C NMR spectra of 3p

7.60  
7.58  
7.44  
7.42

3.97  
3.96  
3.94  
3.92  
2.90  
2.89  
2.87  
2.85  
2.84  
2.82  
2.81  
2.79  
1.55  
1.54  
1.51  
1.50  
1.48  
1.39  
1.37  
1.35  
1.33  
1.31  
-0.90  
-0.89  
-0.87

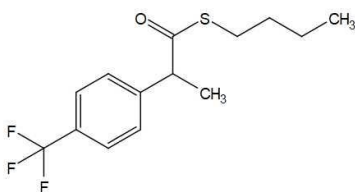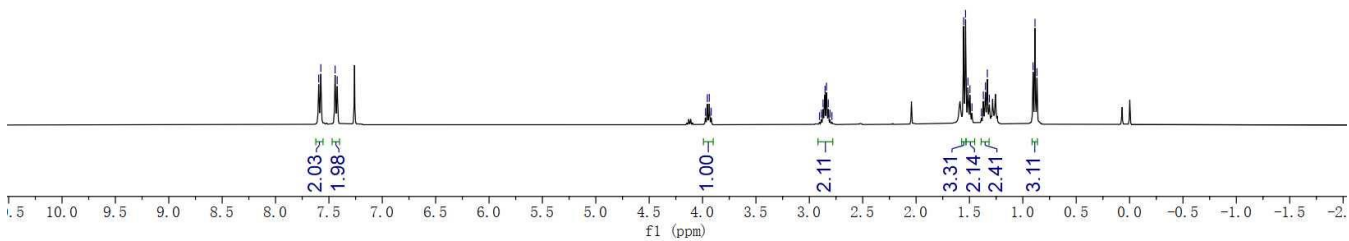

2.03

1.98

1.00

2.11

3.31

2.14

2.41

3.11

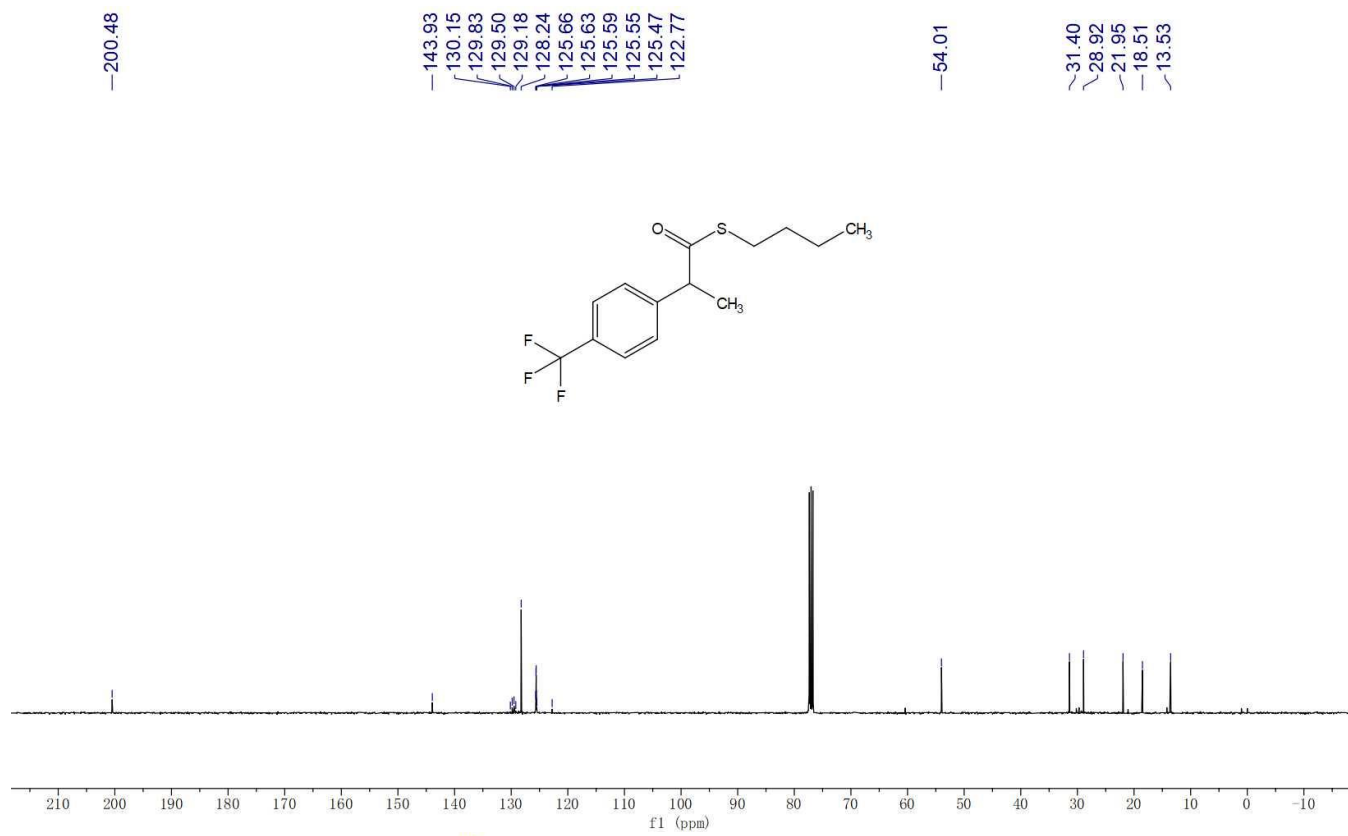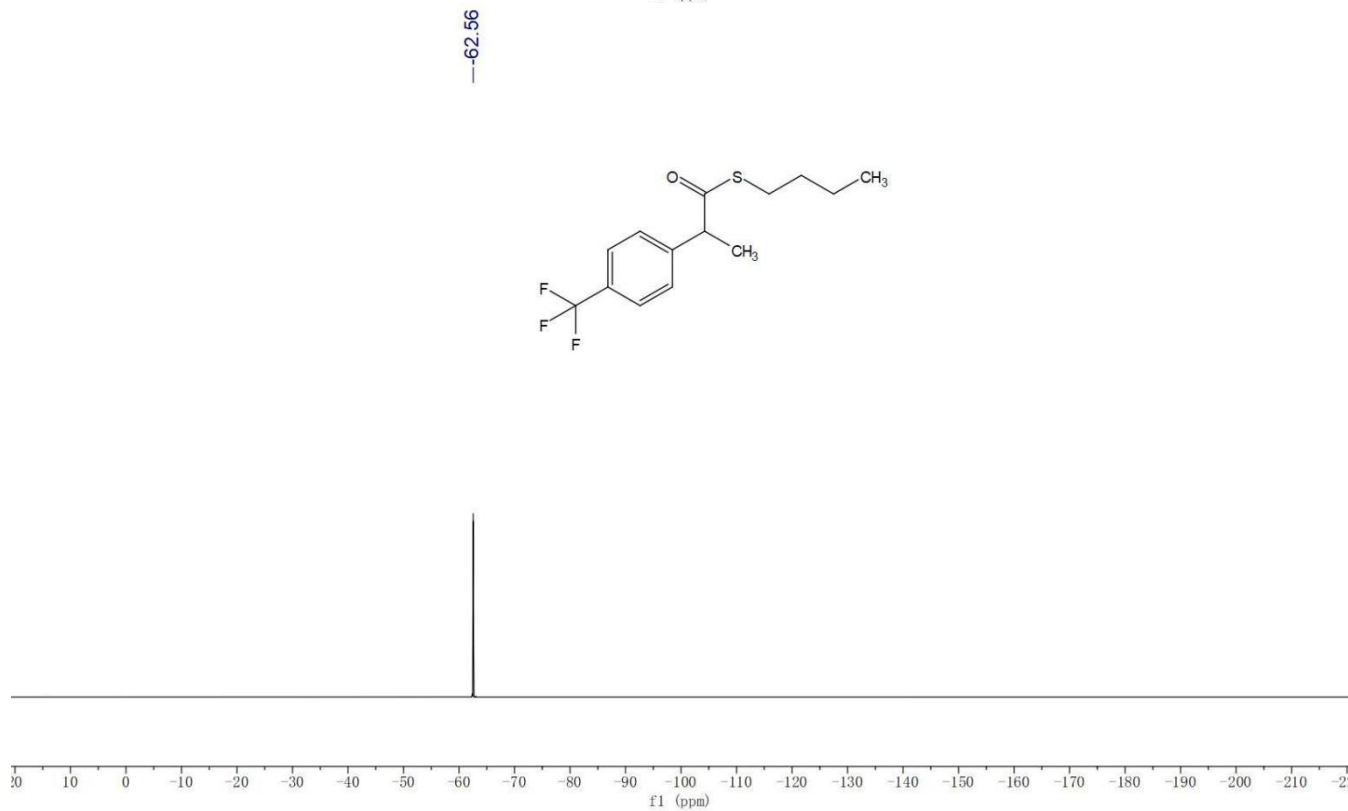

$^1\text{H}$ ,  $^{13}\text{C}$  NMR and  $^{19}\text{F}$  spectra of **3q**

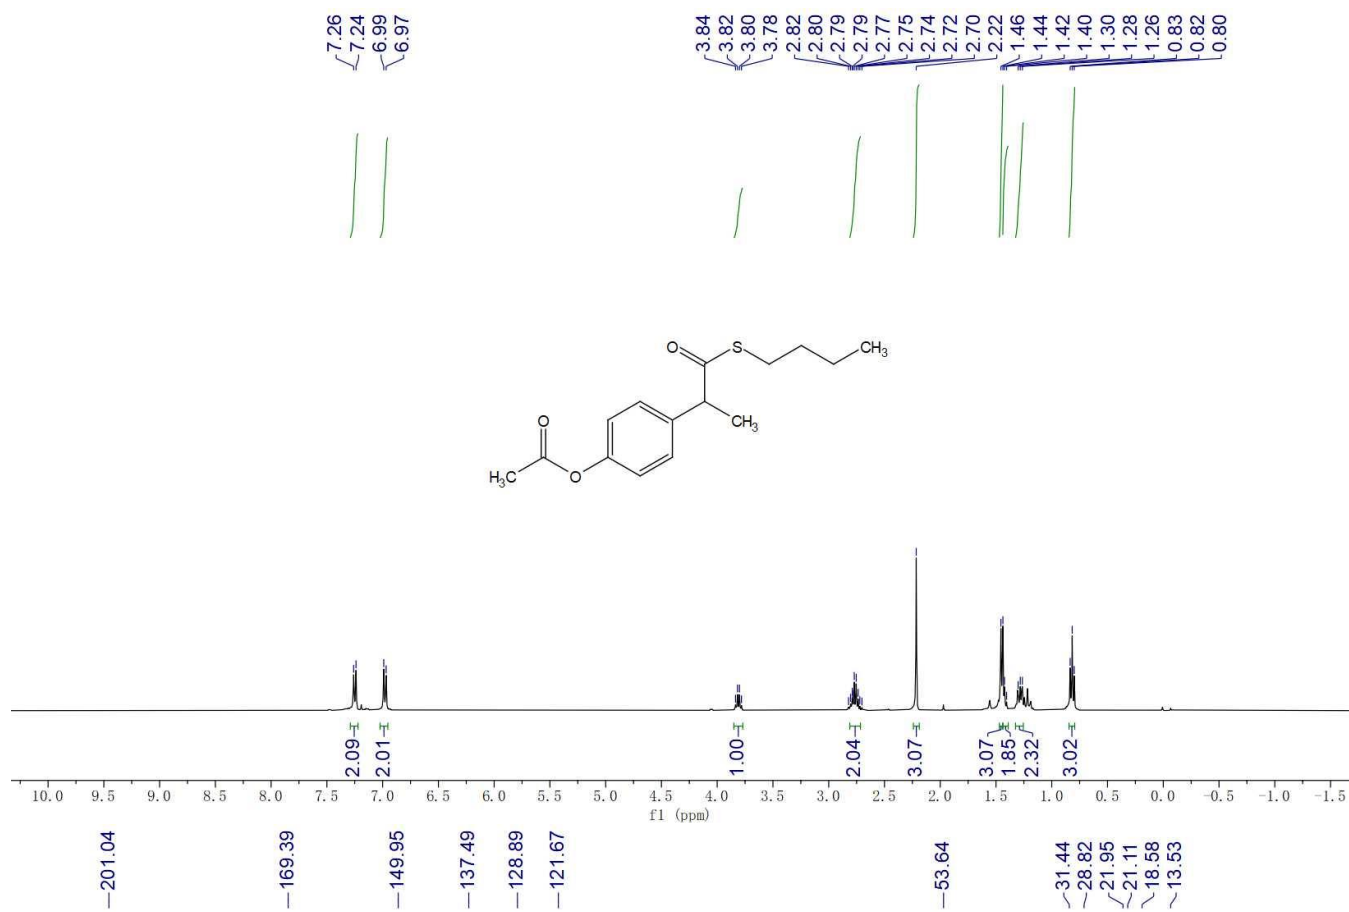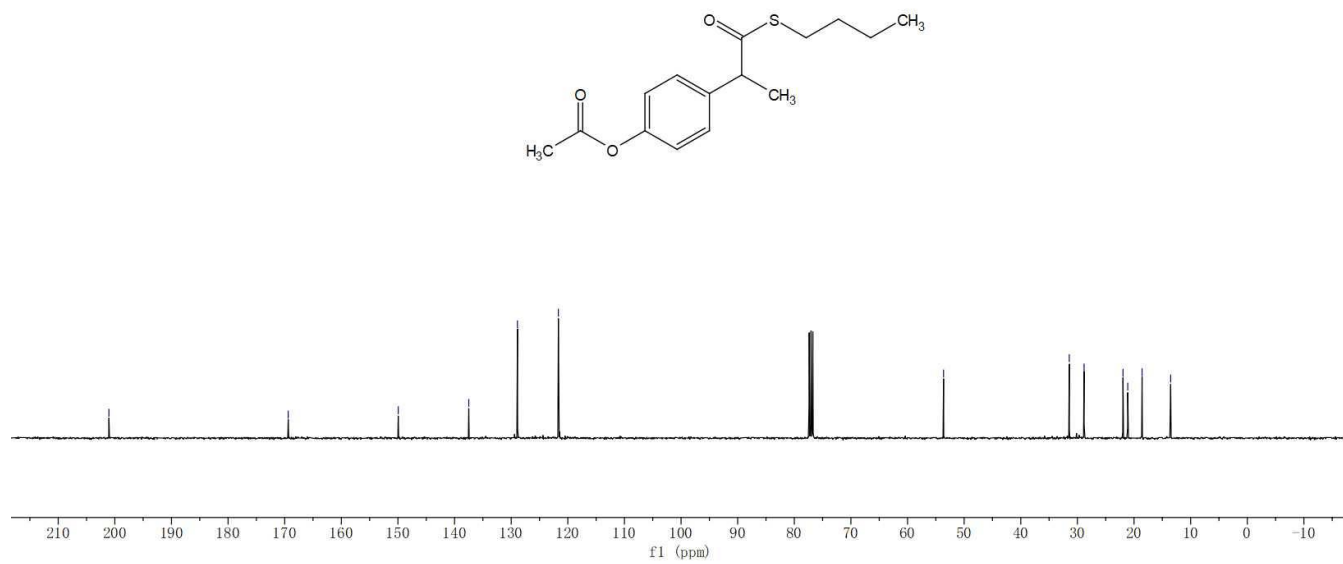

<sup>1</sup>H and <sup>13</sup>C NMR spectra of 3r

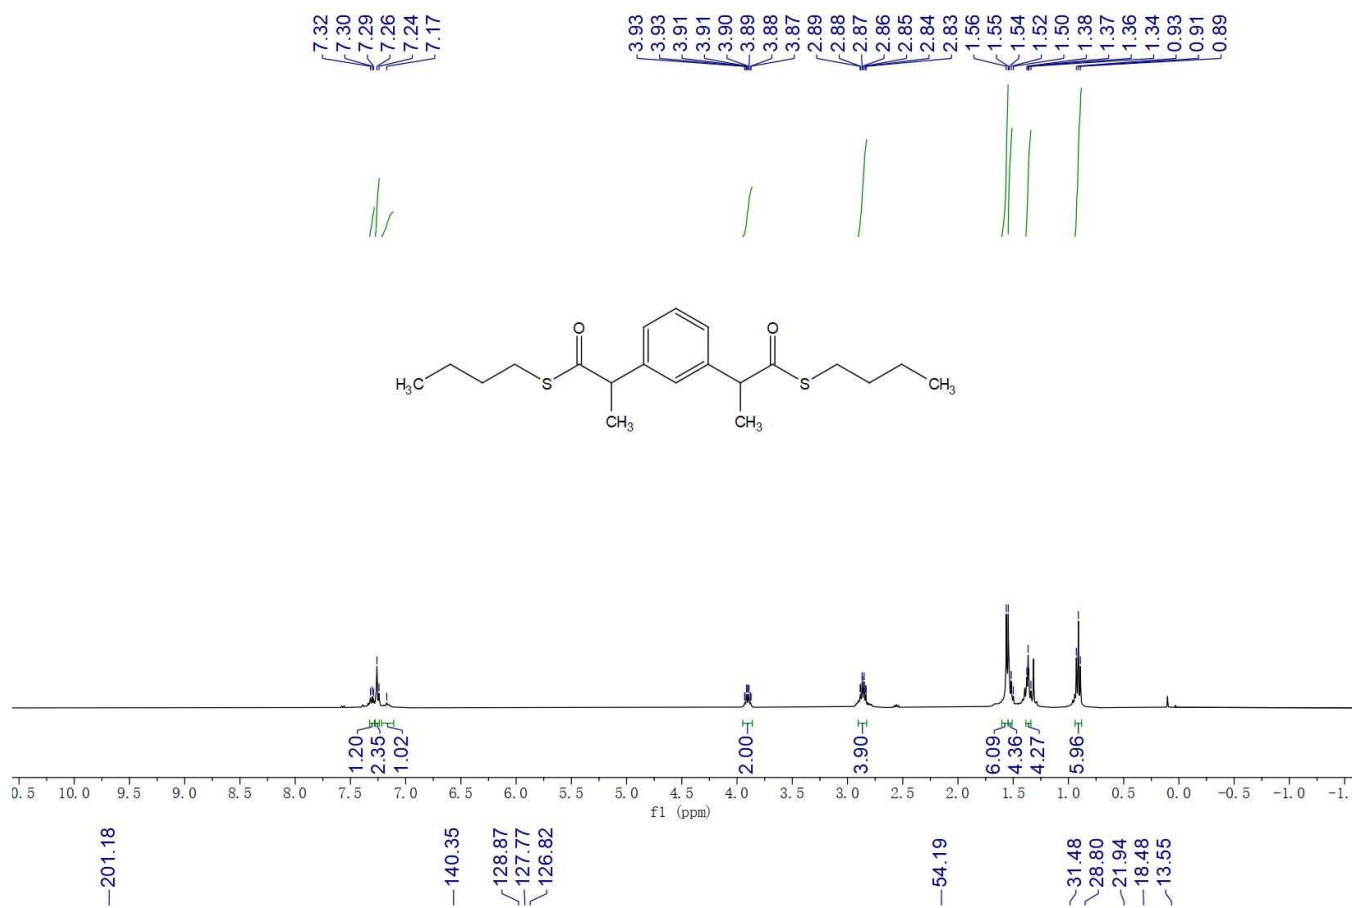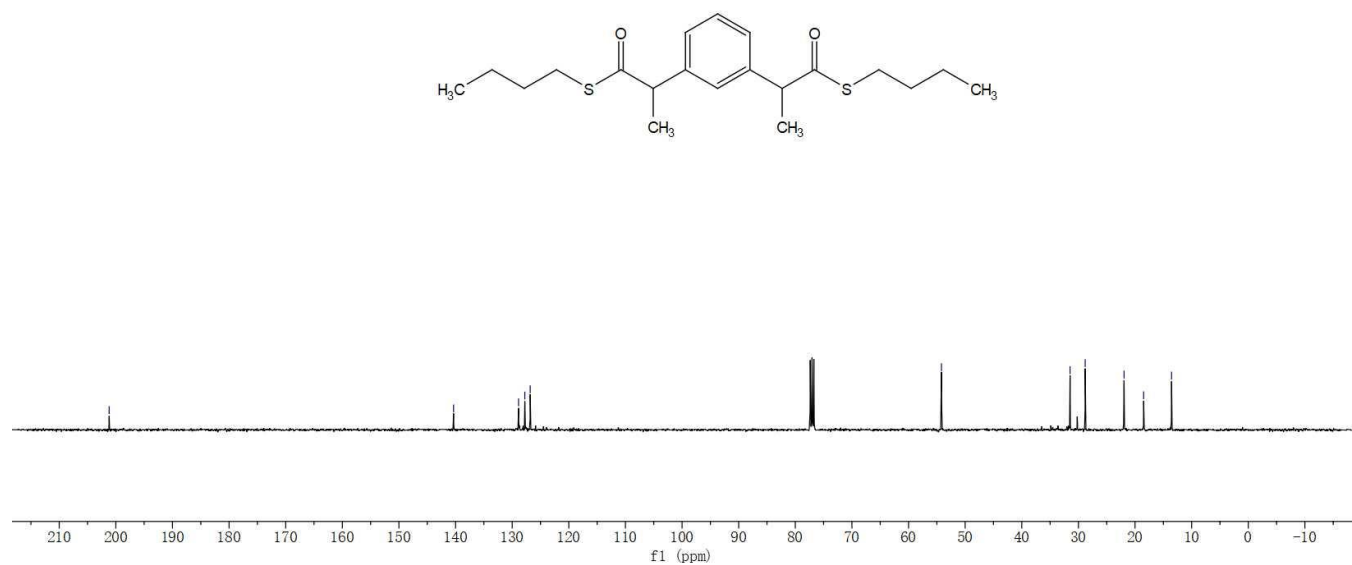

<sup>1</sup>H and <sup>13</sup>C NMR spectra of **3s**

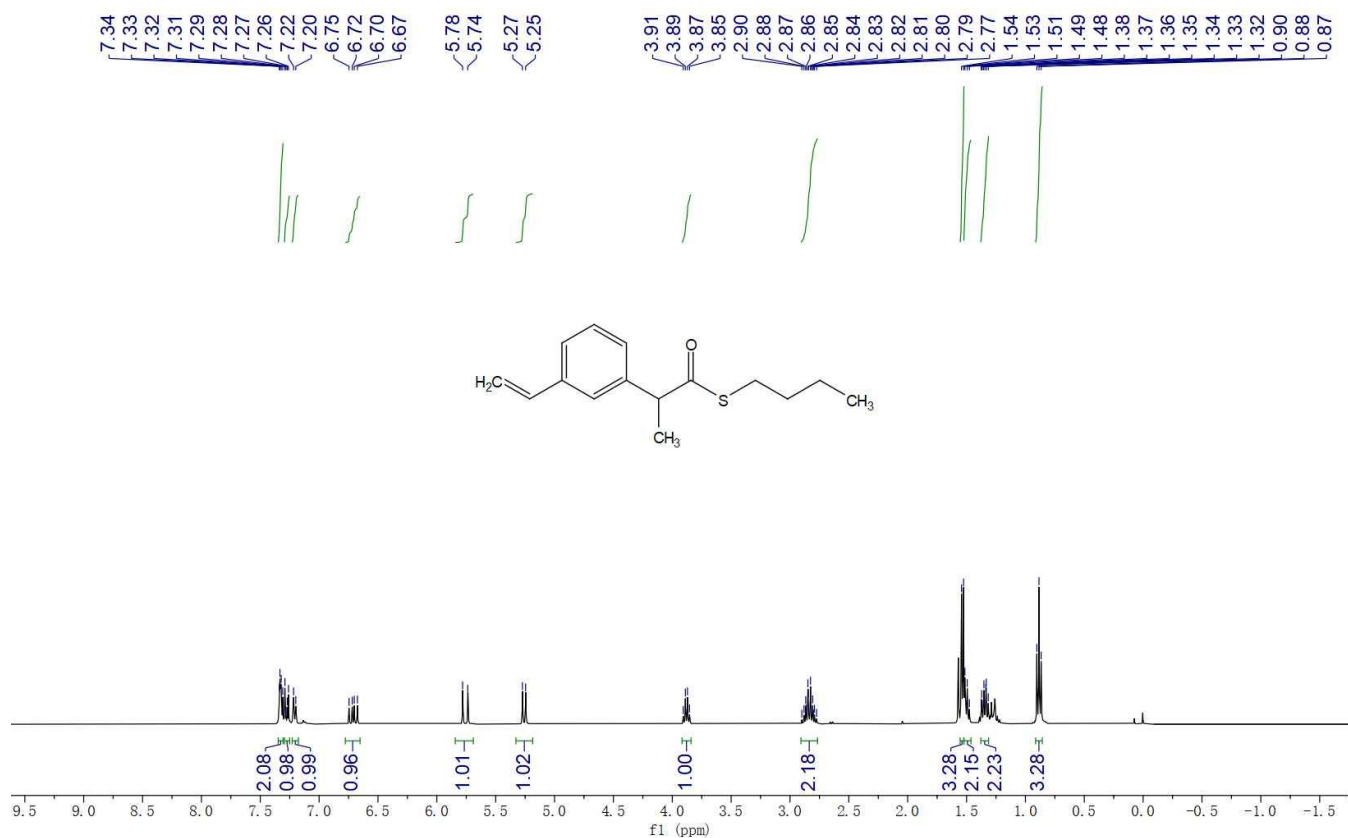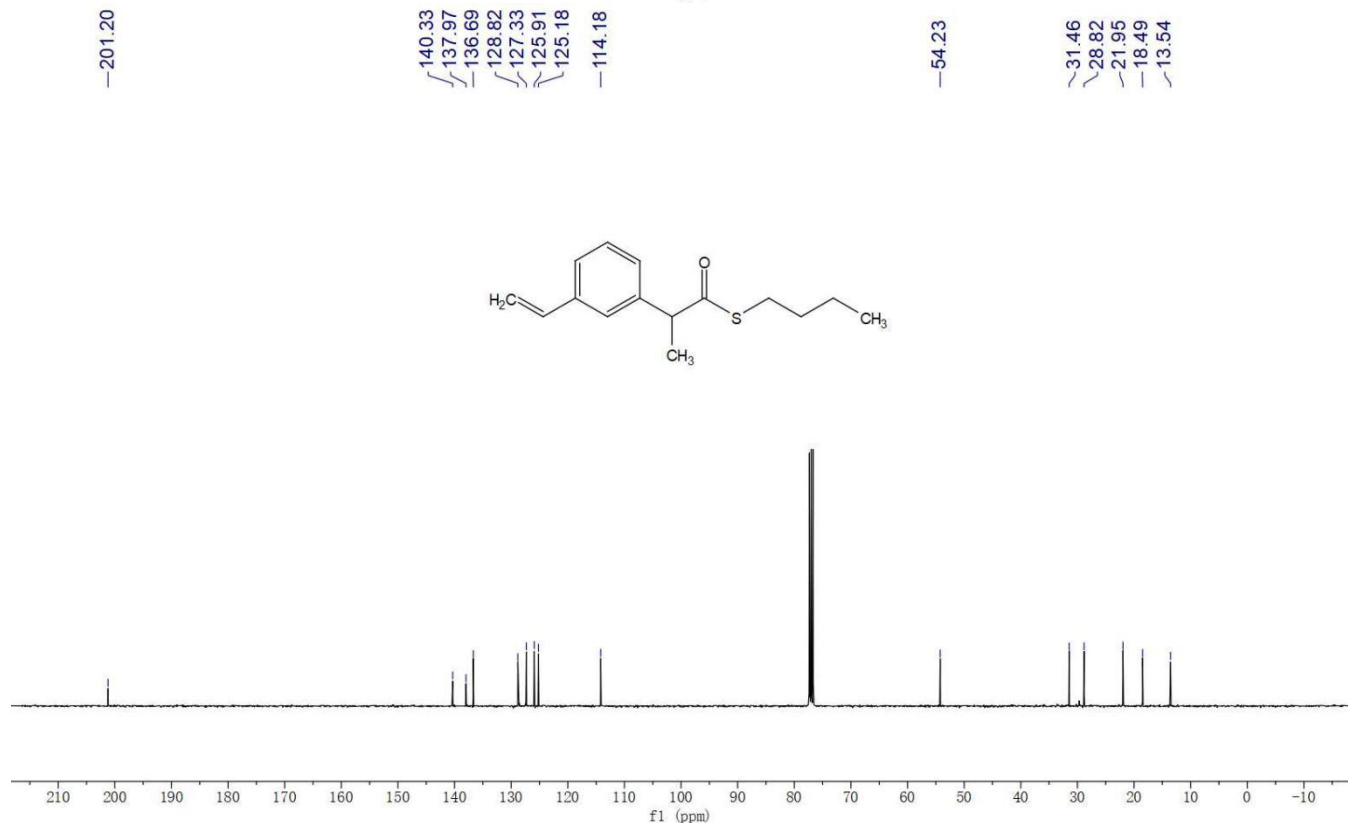

<sup>1</sup>H and <sup>13</sup>C NMR spectra of 3t

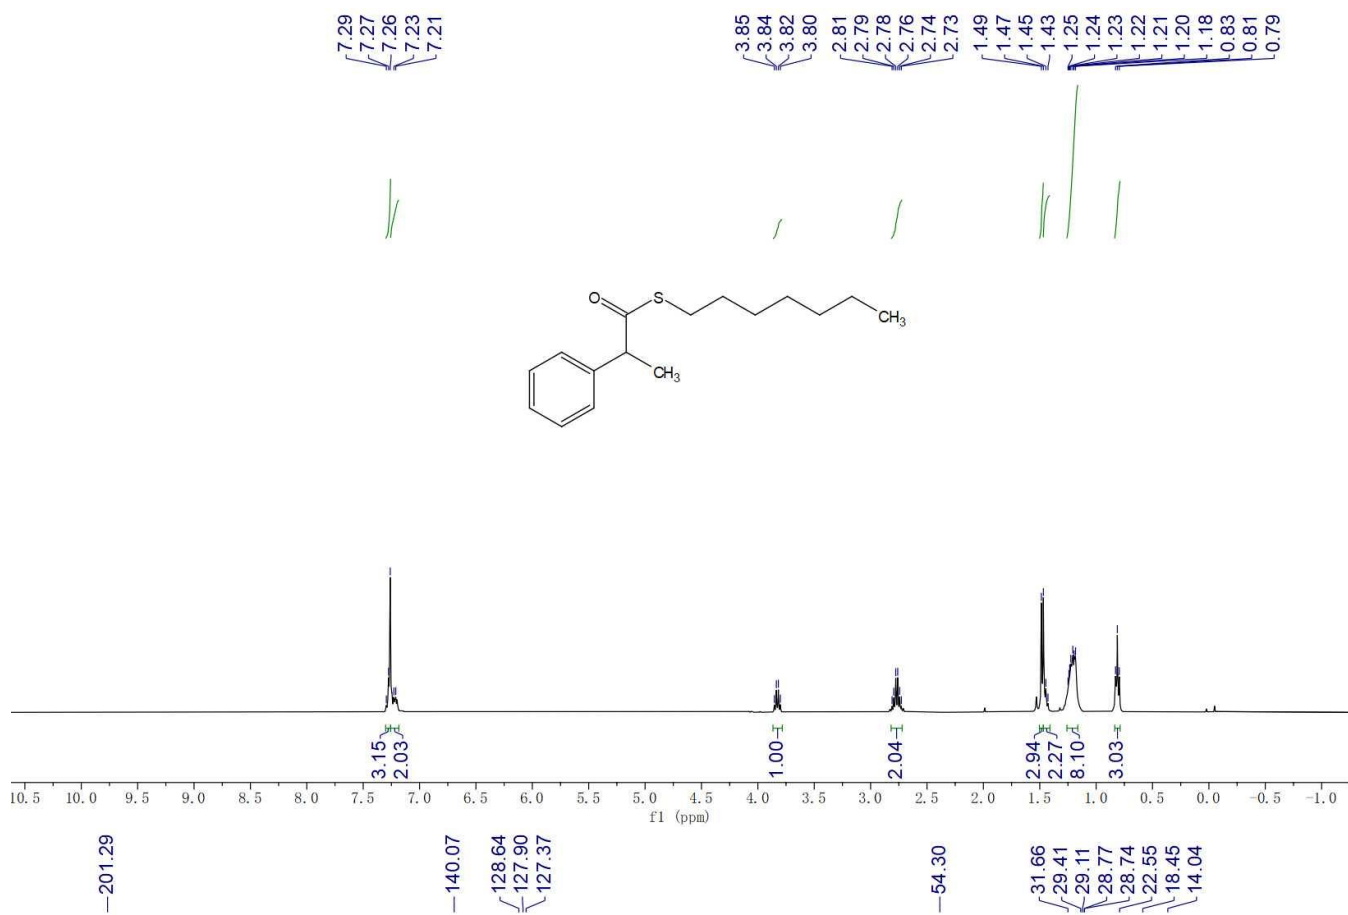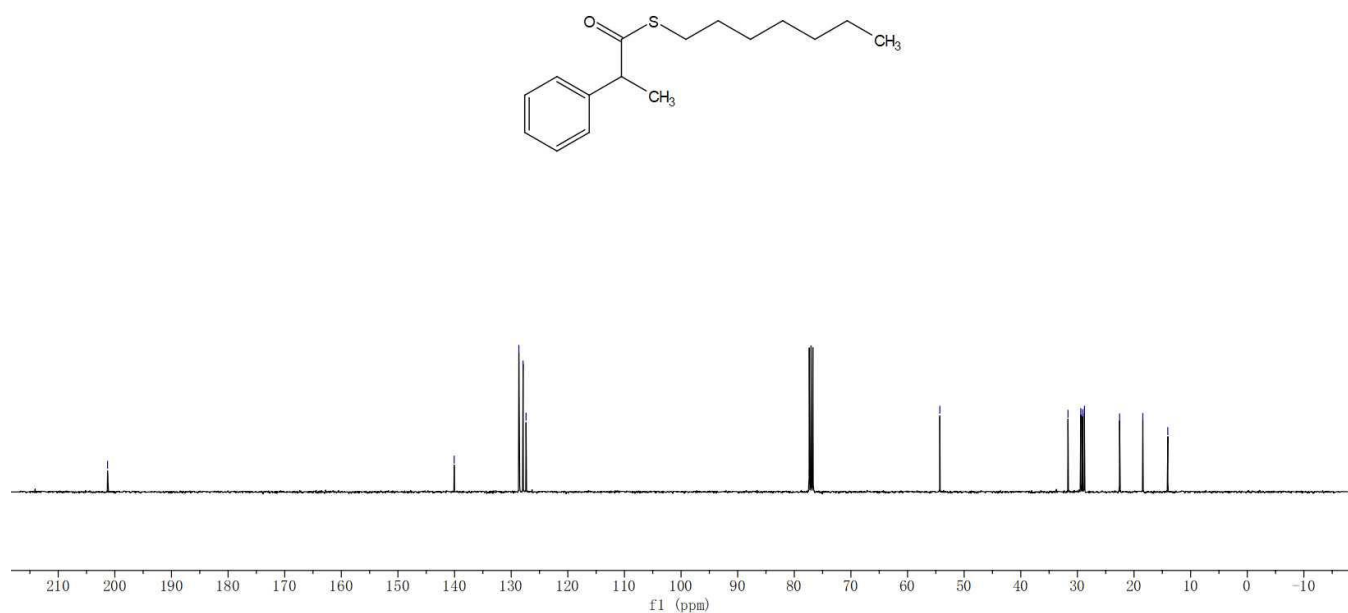

<sup>1</sup>H and <sup>13</sup>C NMR spectra of 3v



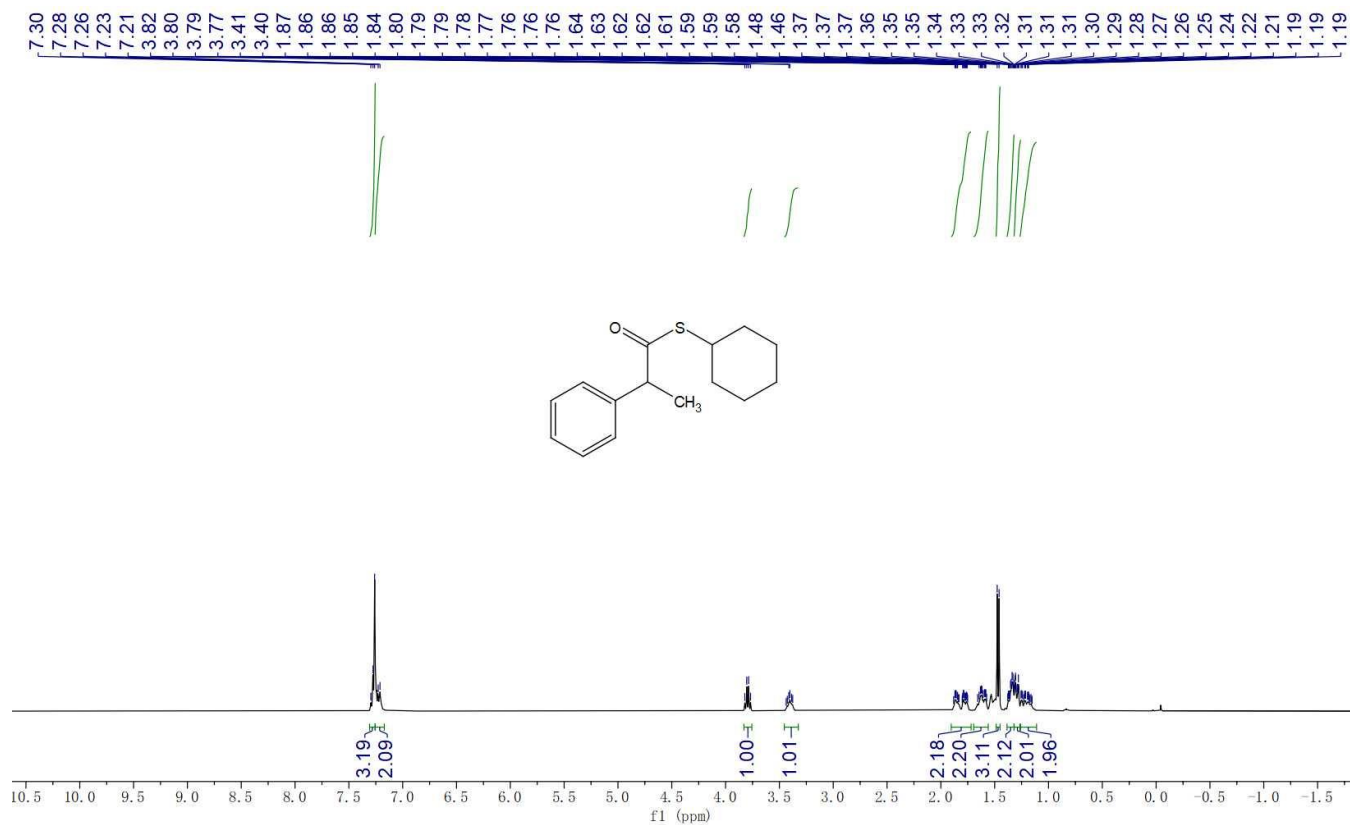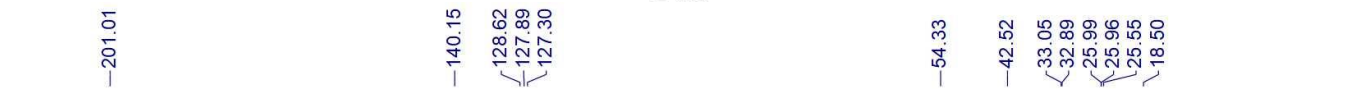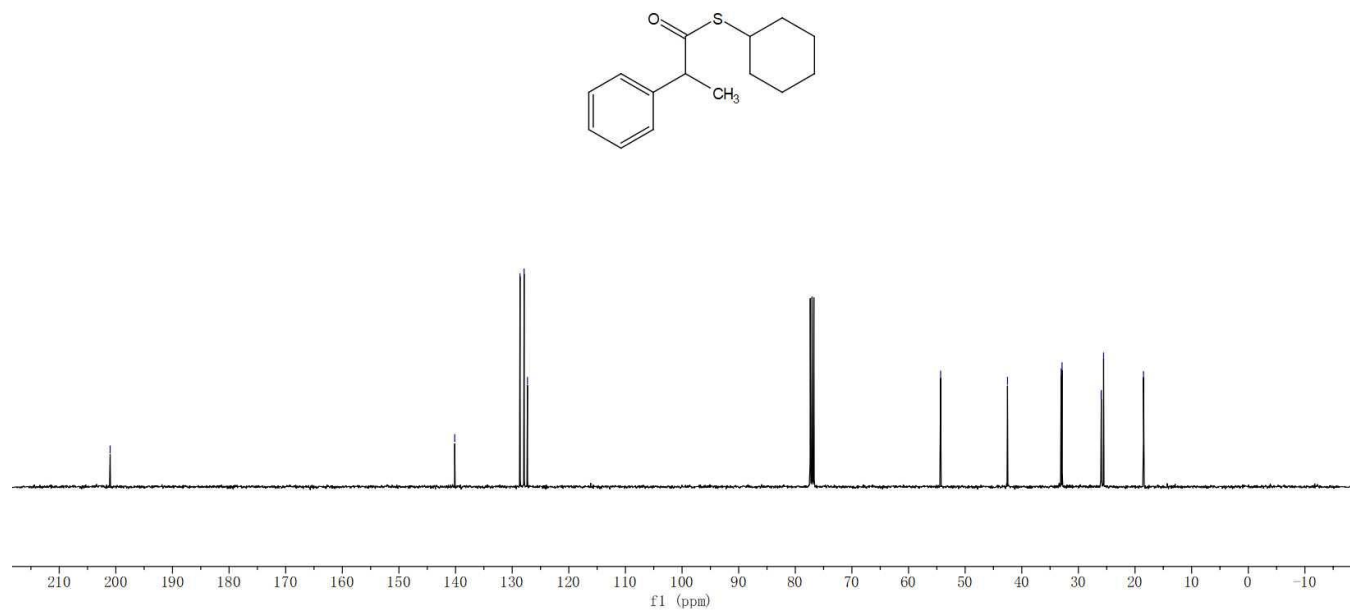

<sup>1</sup>H and <sup>13</sup>C NMR spectra of 3w

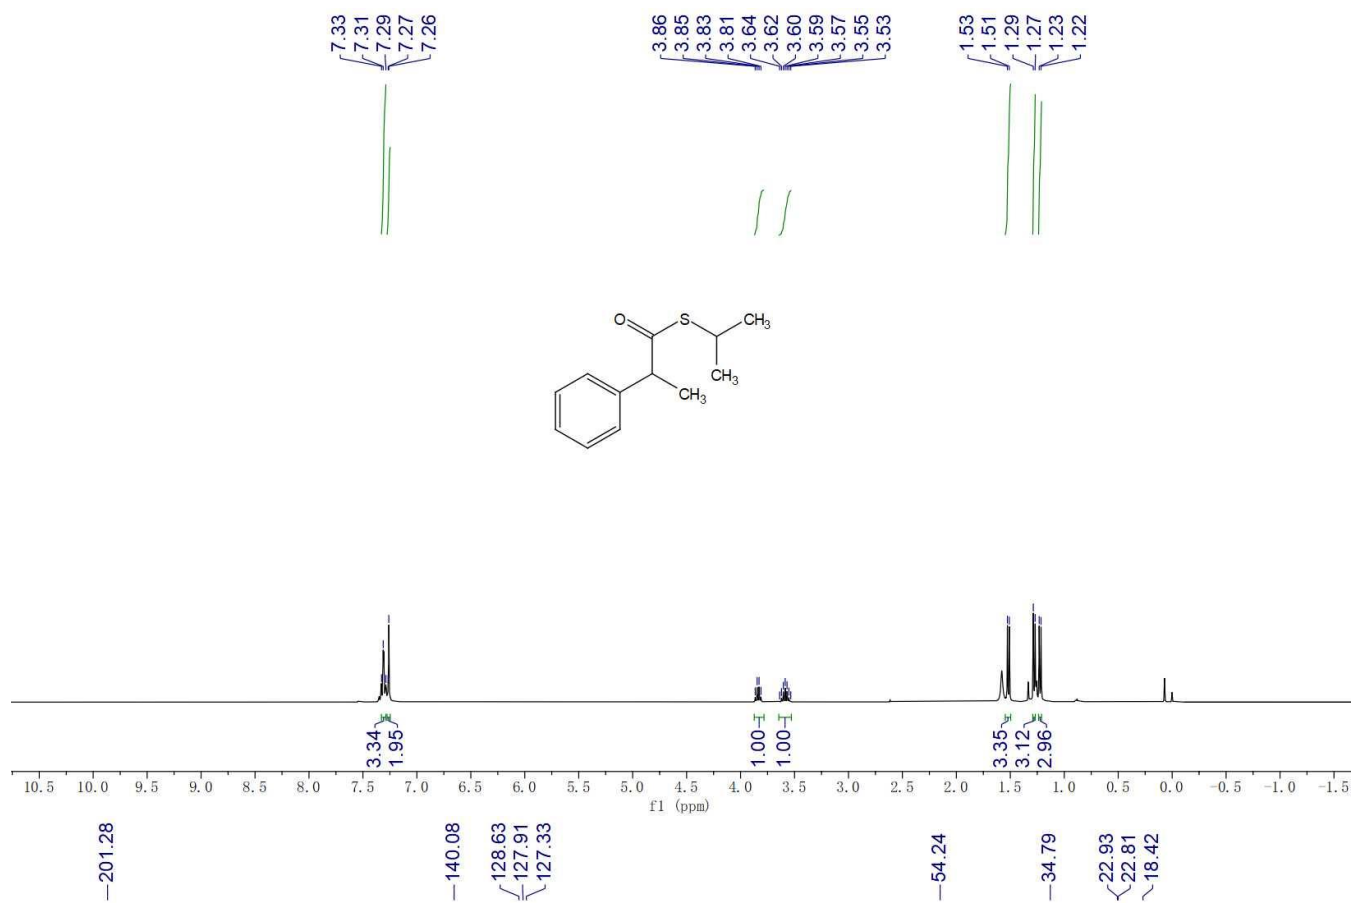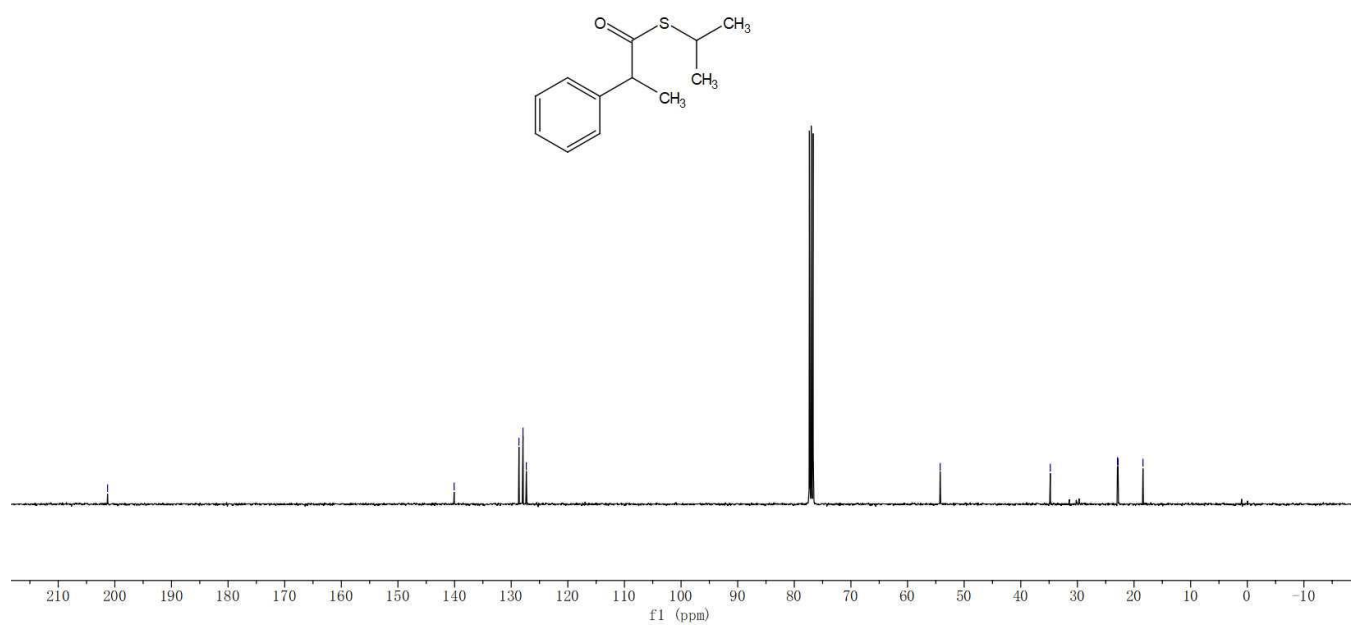

<sup>1</sup>H and <sup>13</sup>C NMR spectra of **3x**

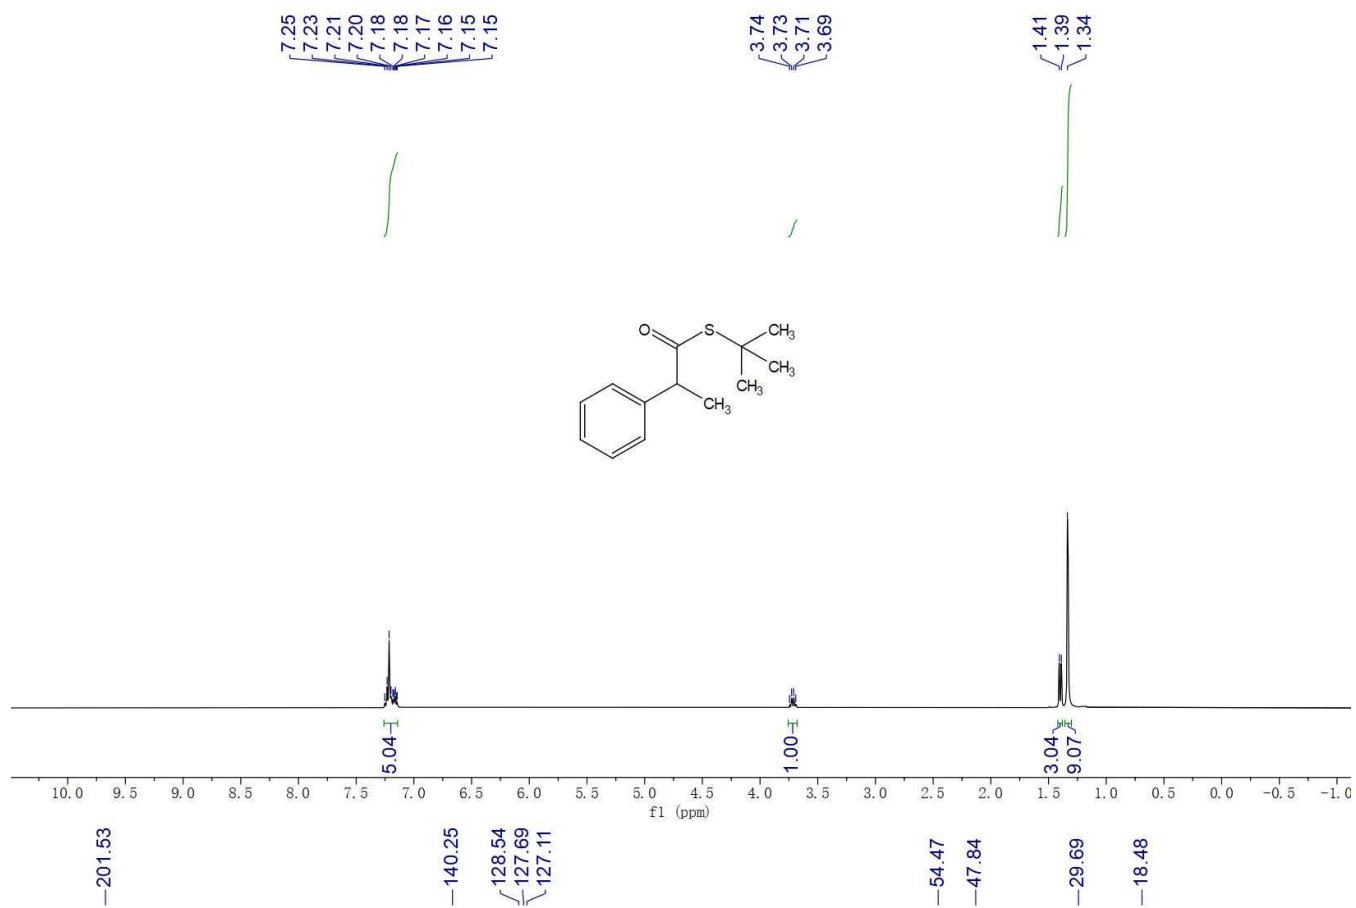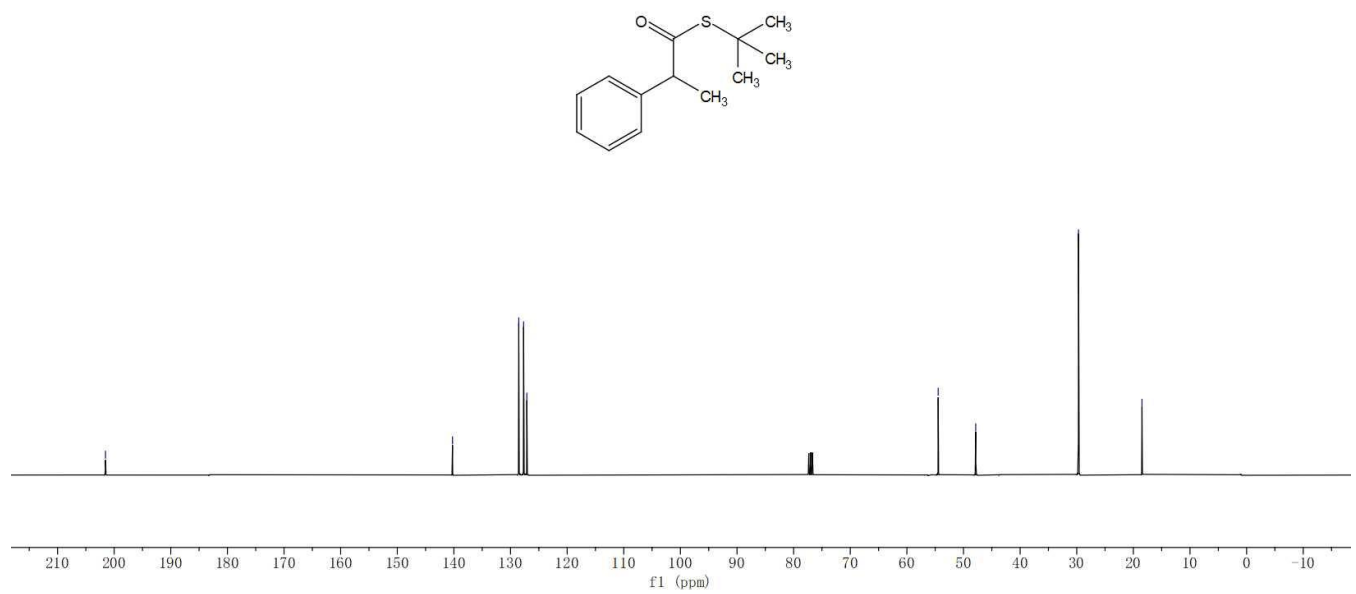

<sup>1</sup>H and <sup>13</sup>C NMR spectra of **3y**

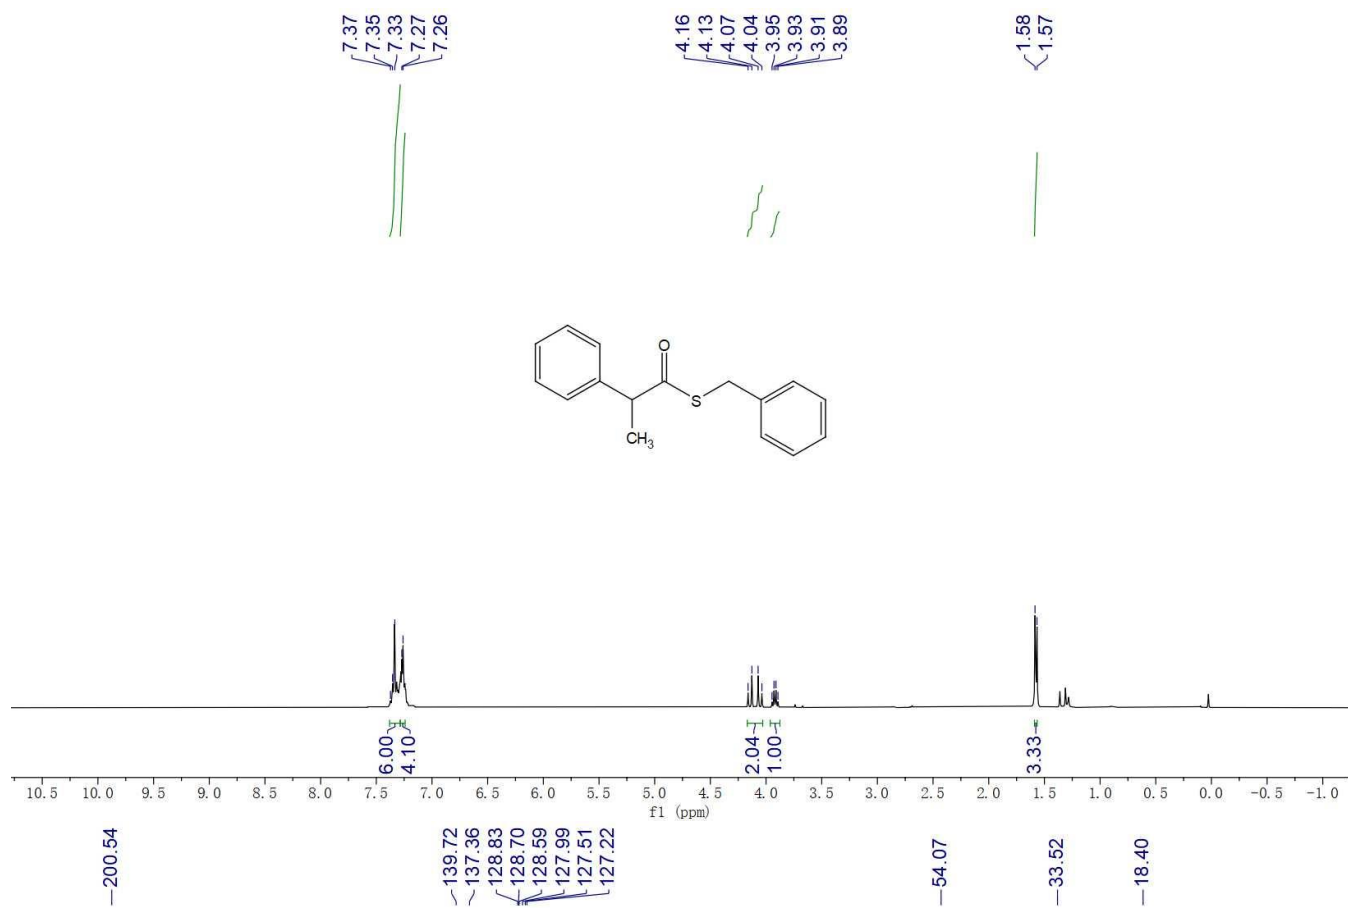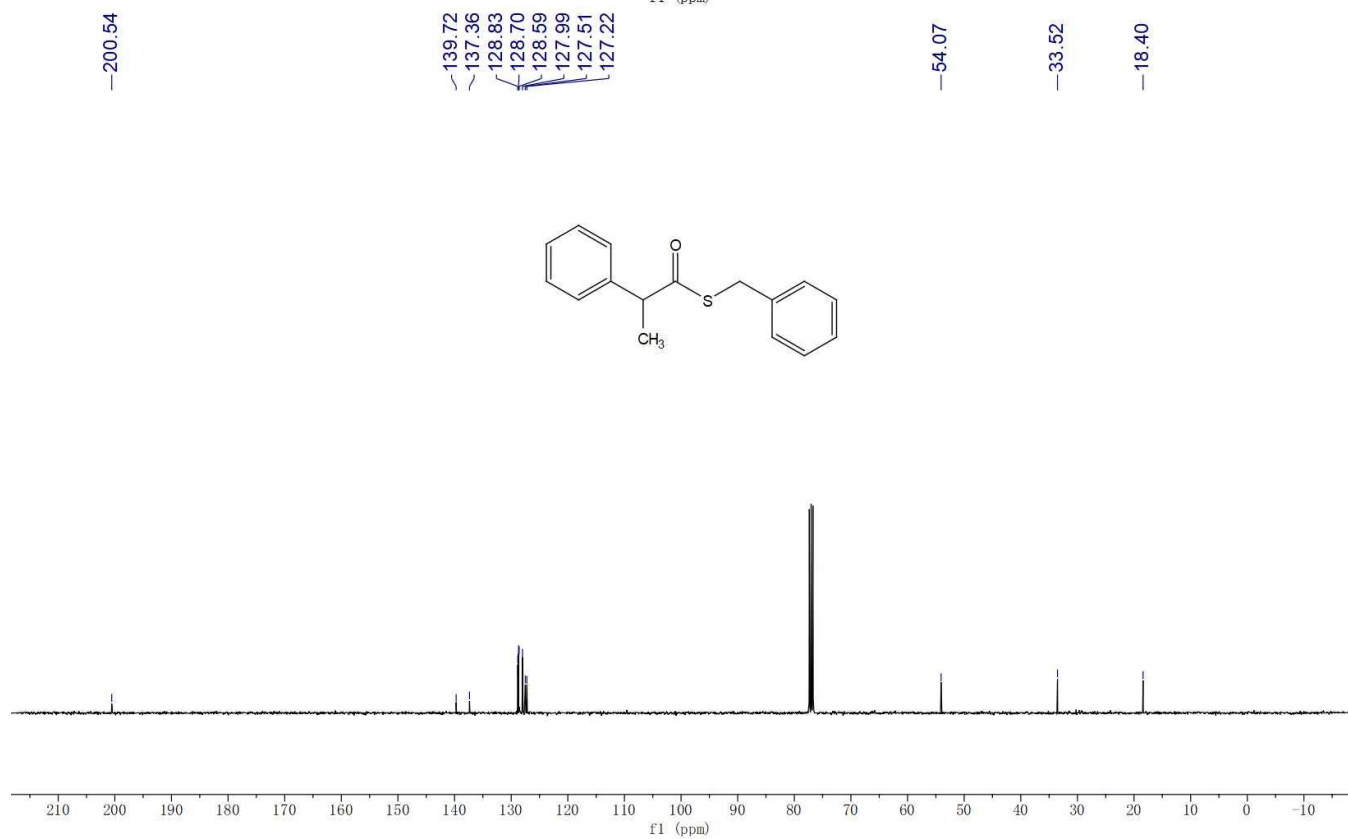

<sup>1</sup>H and <sup>13</sup>C NMR spectra of **3z**

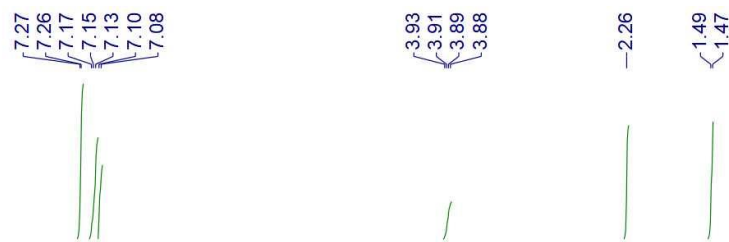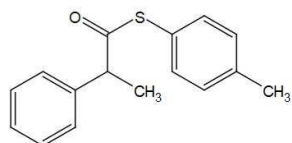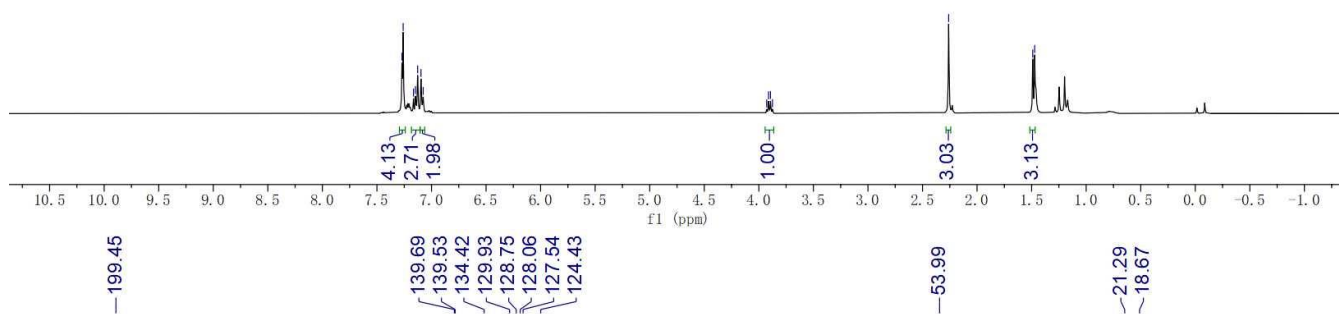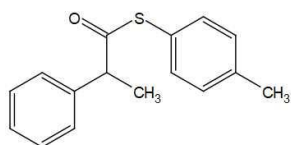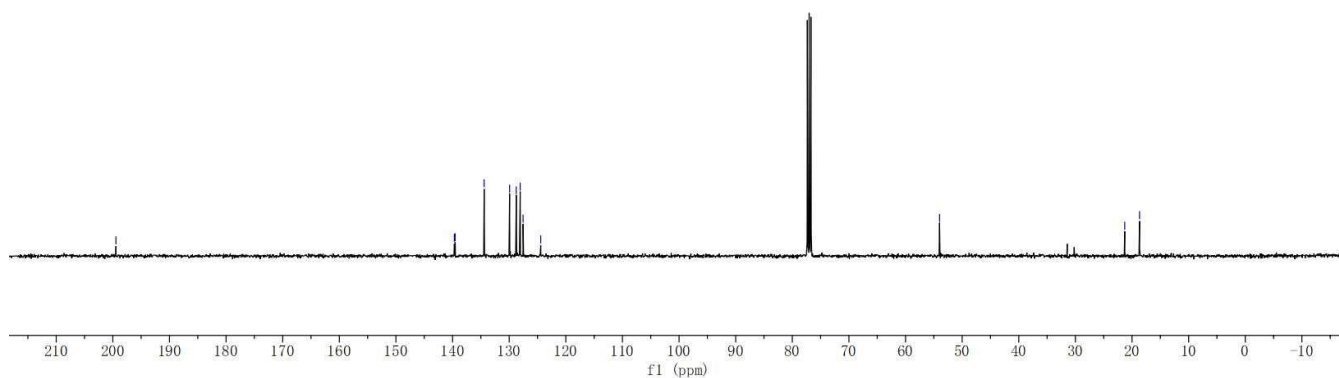

<sup>1</sup>H and <sup>13</sup>C NMR spectra of 3aa

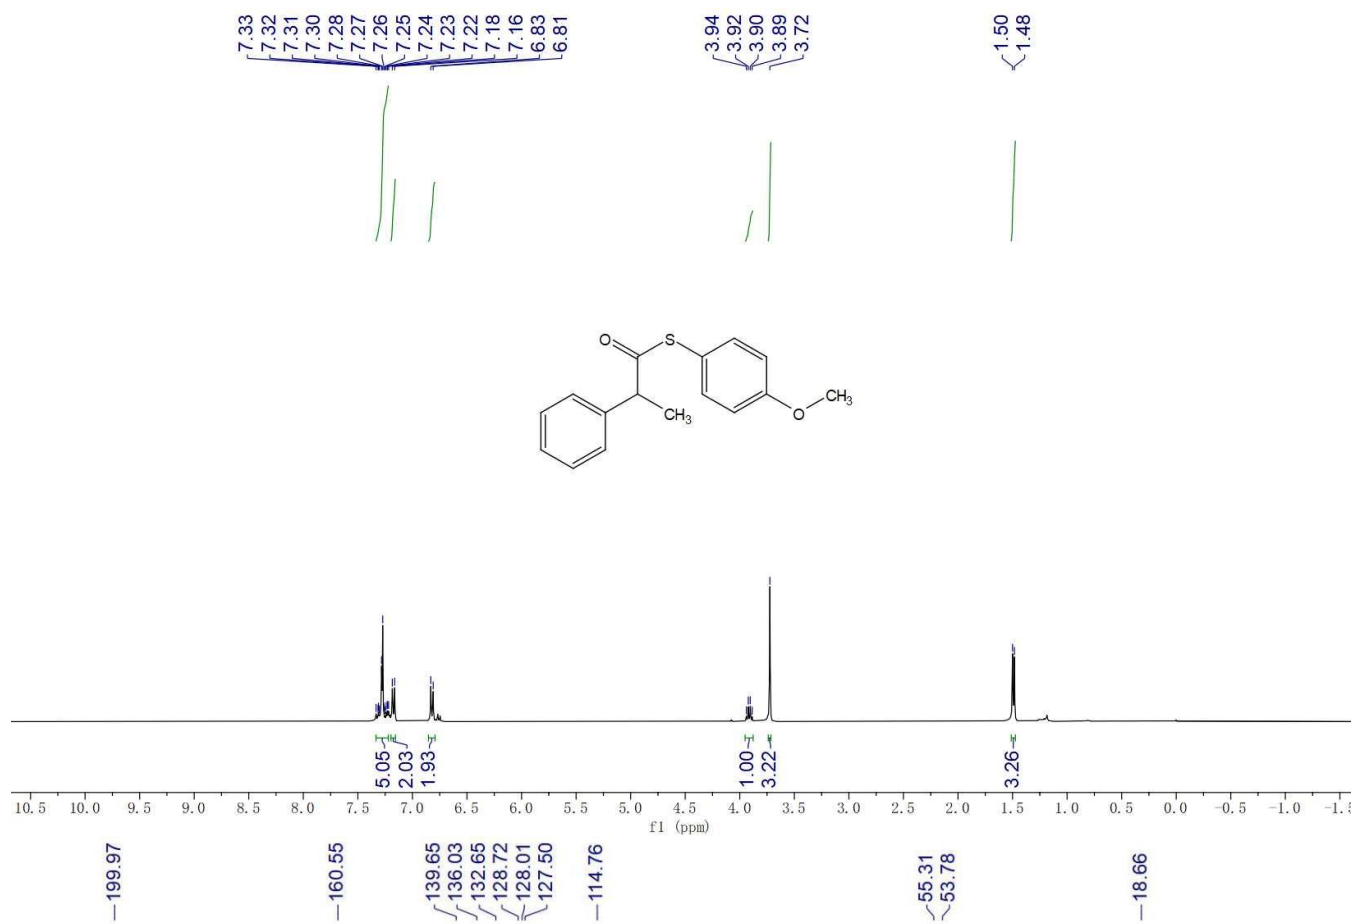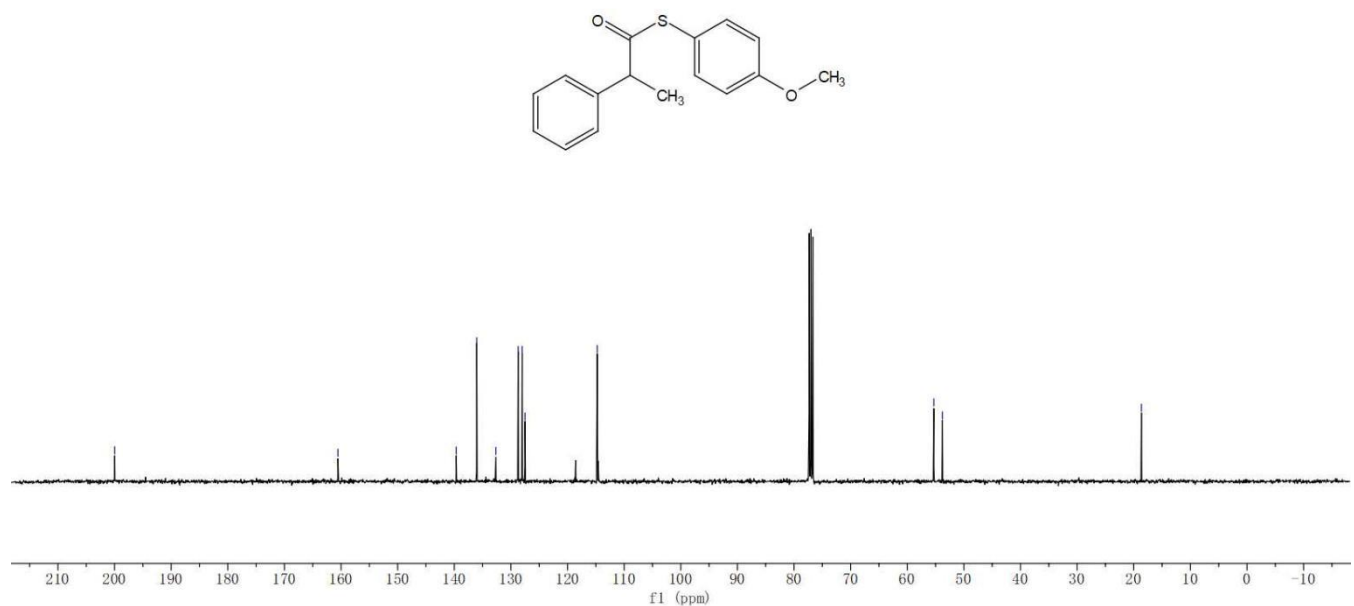

<sup>1</sup>H and <sup>13</sup>C NMR spectra of 3ab

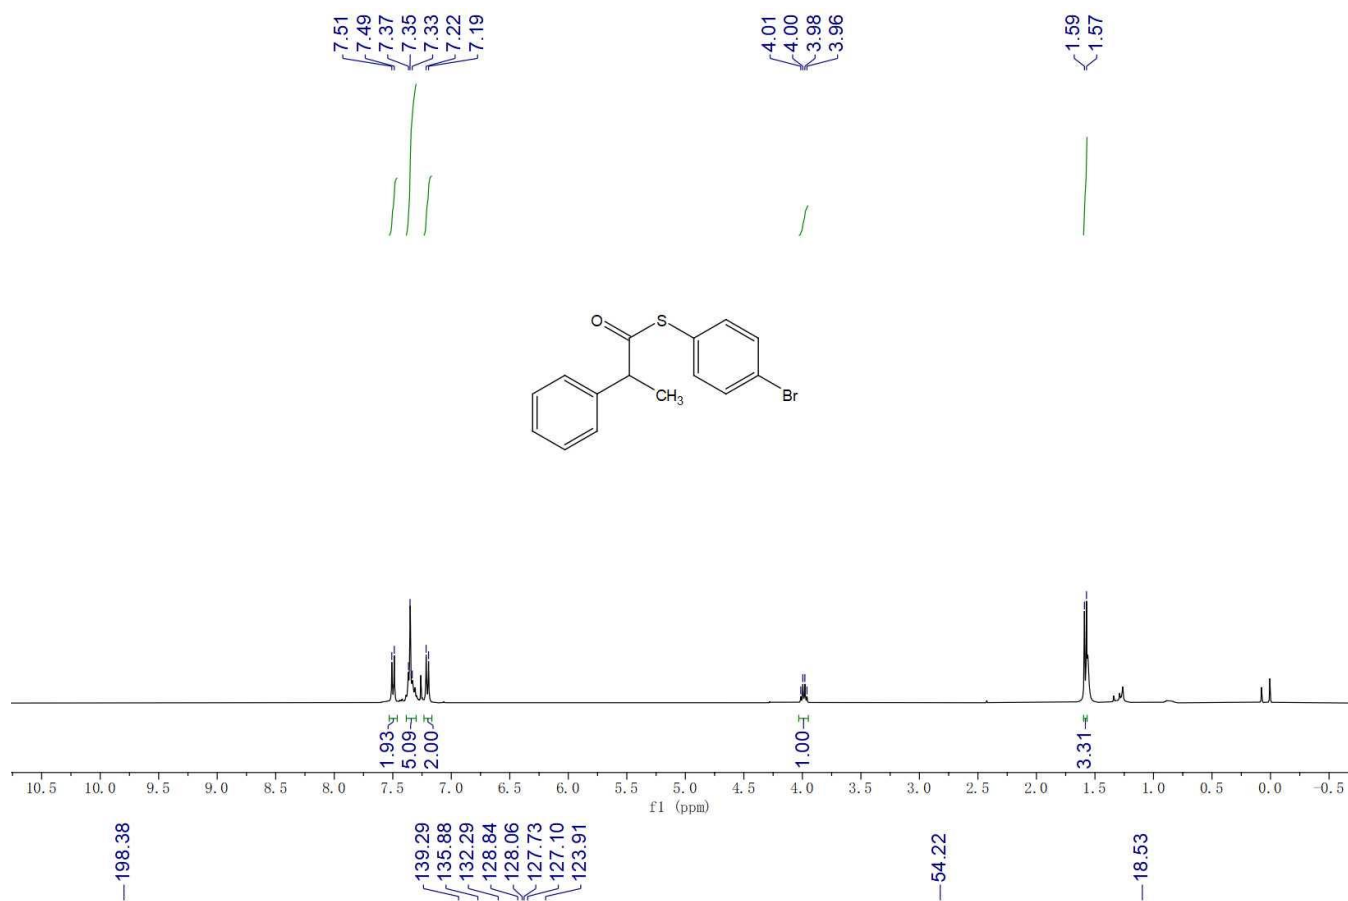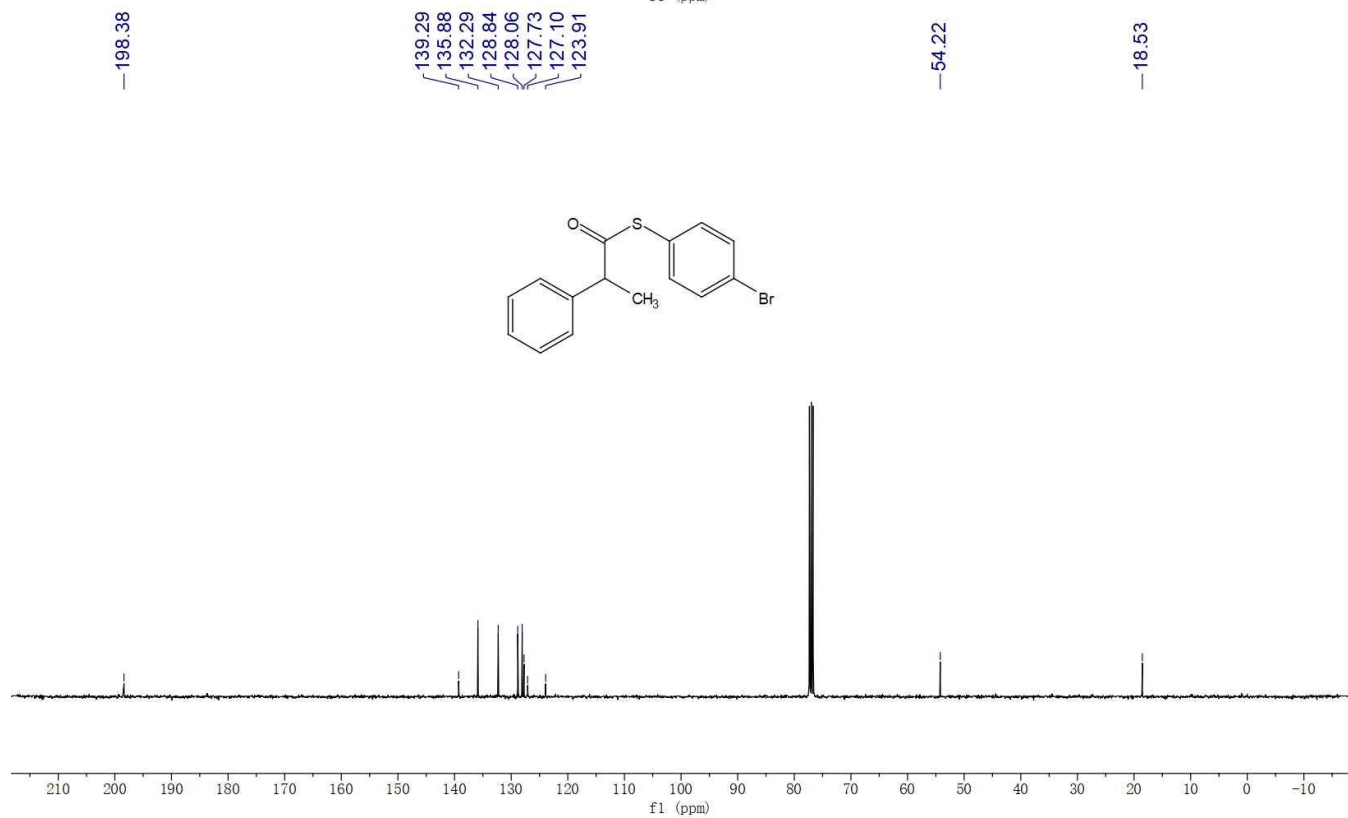

$^1\text{H}$  and  $^{13}\text{C}$  NMR spectra of **3ac**

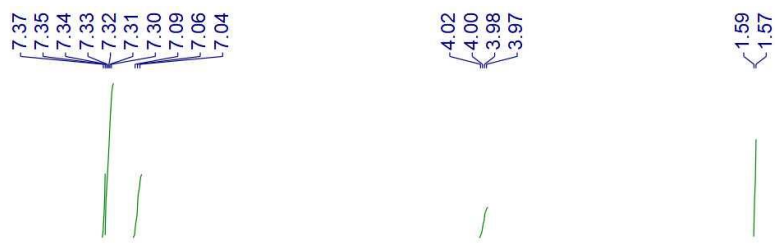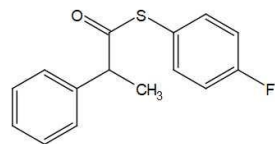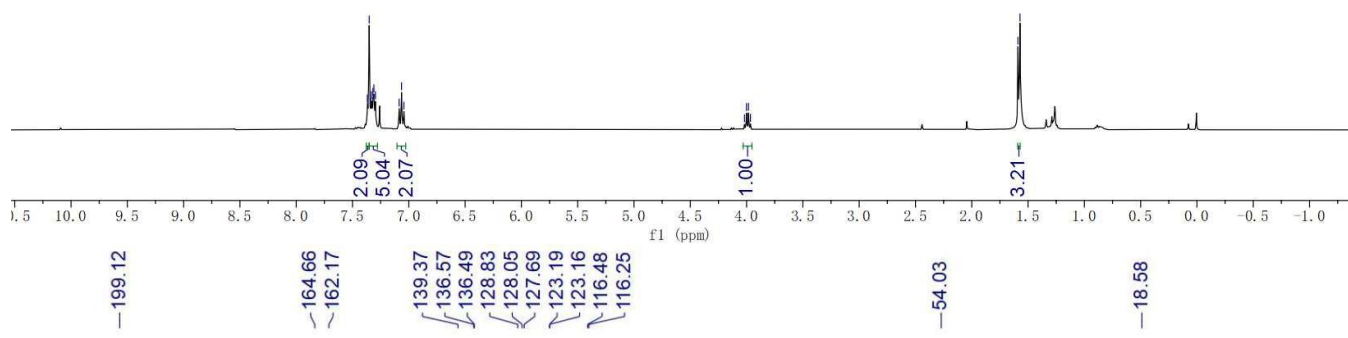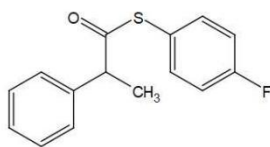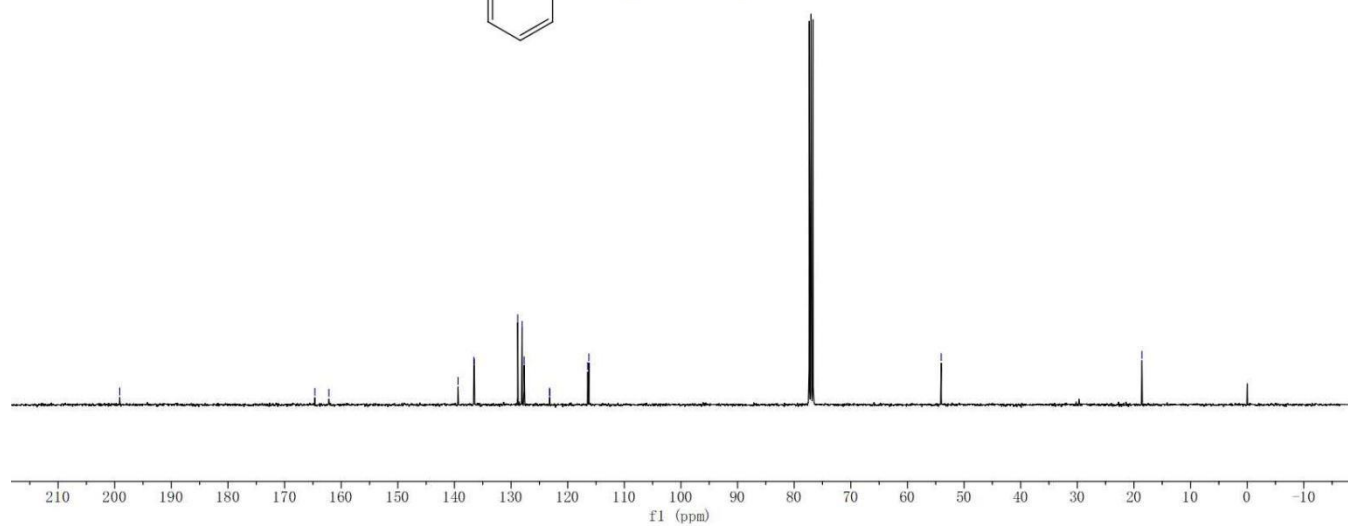



--111.35

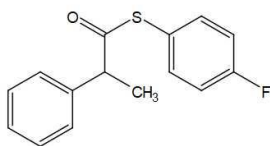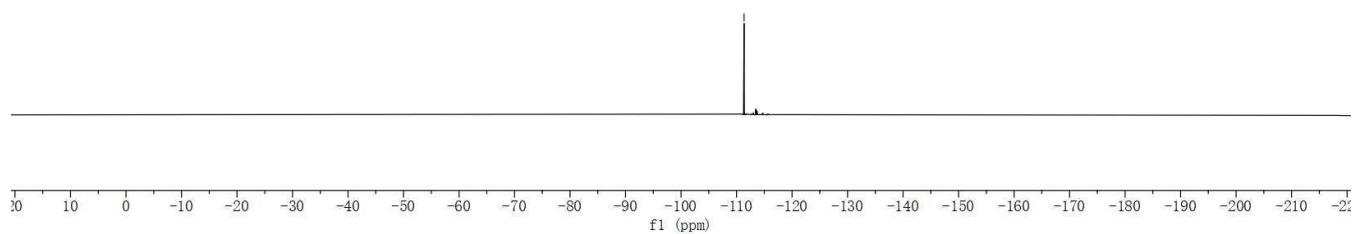

$^1\text{H}$ ,  $^{13}\text{C}$  and  $^{19}\text{F}$  NMR spectra of 3ad

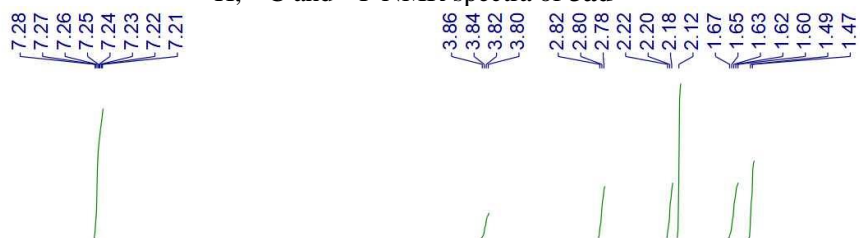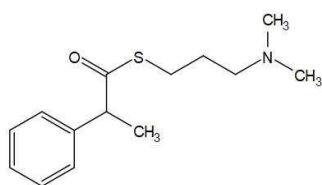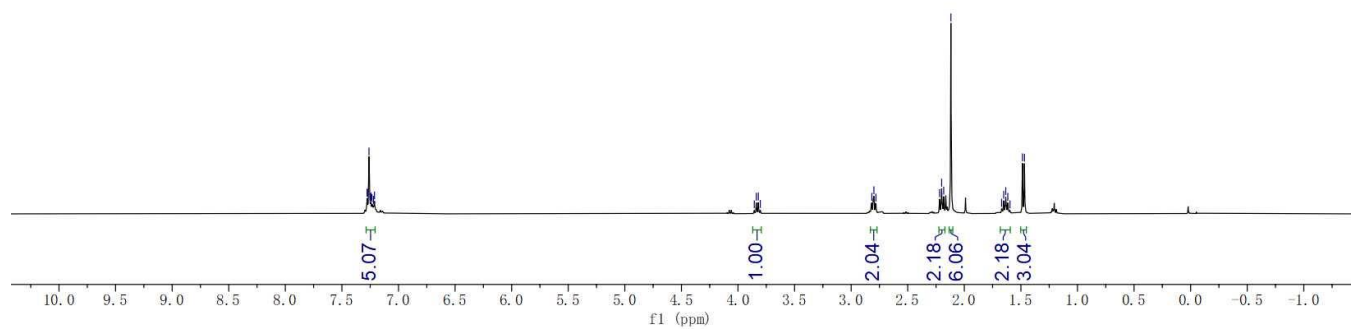

—201.12

—139.97  
—128.66  
—127.90  
—127.41

—58.43  
—54.28

—45.40

—27.56  
—27.03

—18.41

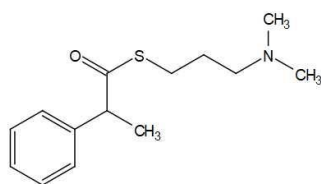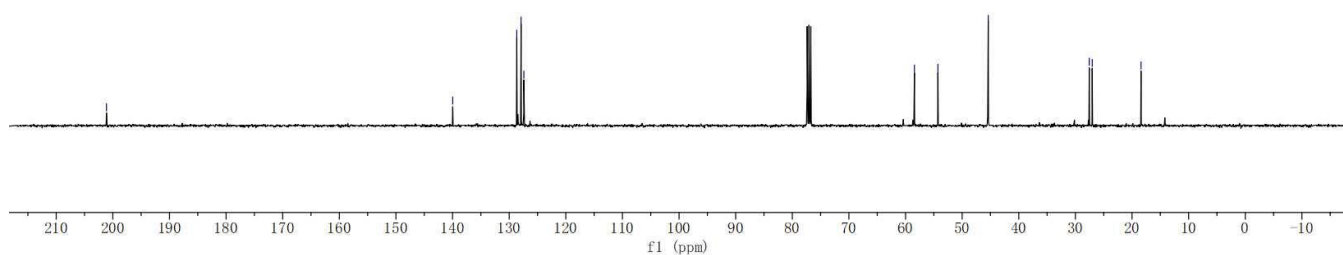

<sup>1</sup>H, <sup>13</sup>C spectra of 3ae

7.22  
7.20  
6.87  
6.85

3.84  
3.83  
3.81  
3.79  
3.78  
2.86  
2.85  
2.84  
2.83  
2.82  
2.82  
2.27  
2.25  
2.24  
2.17  
1.72  
1.70  
1.68  
1.66  
1.64  
1.50  
1.49

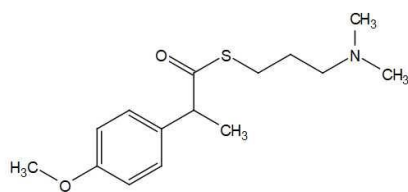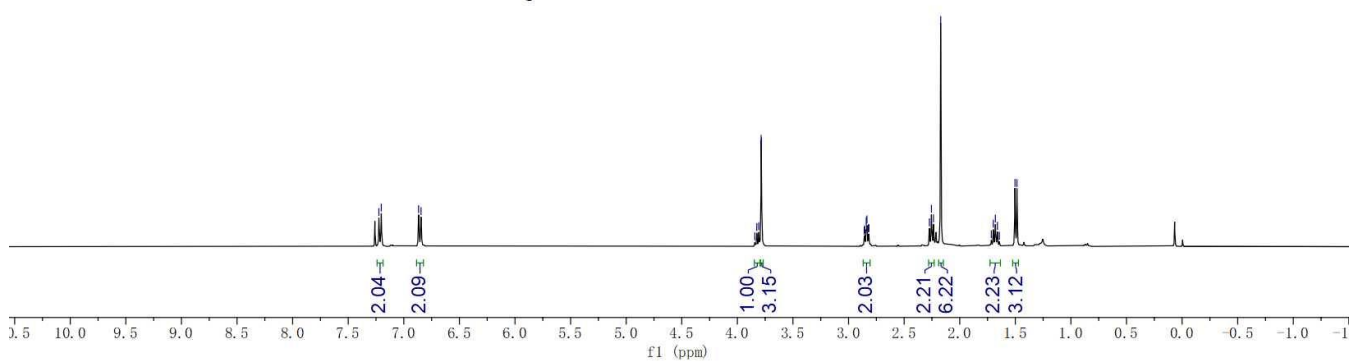

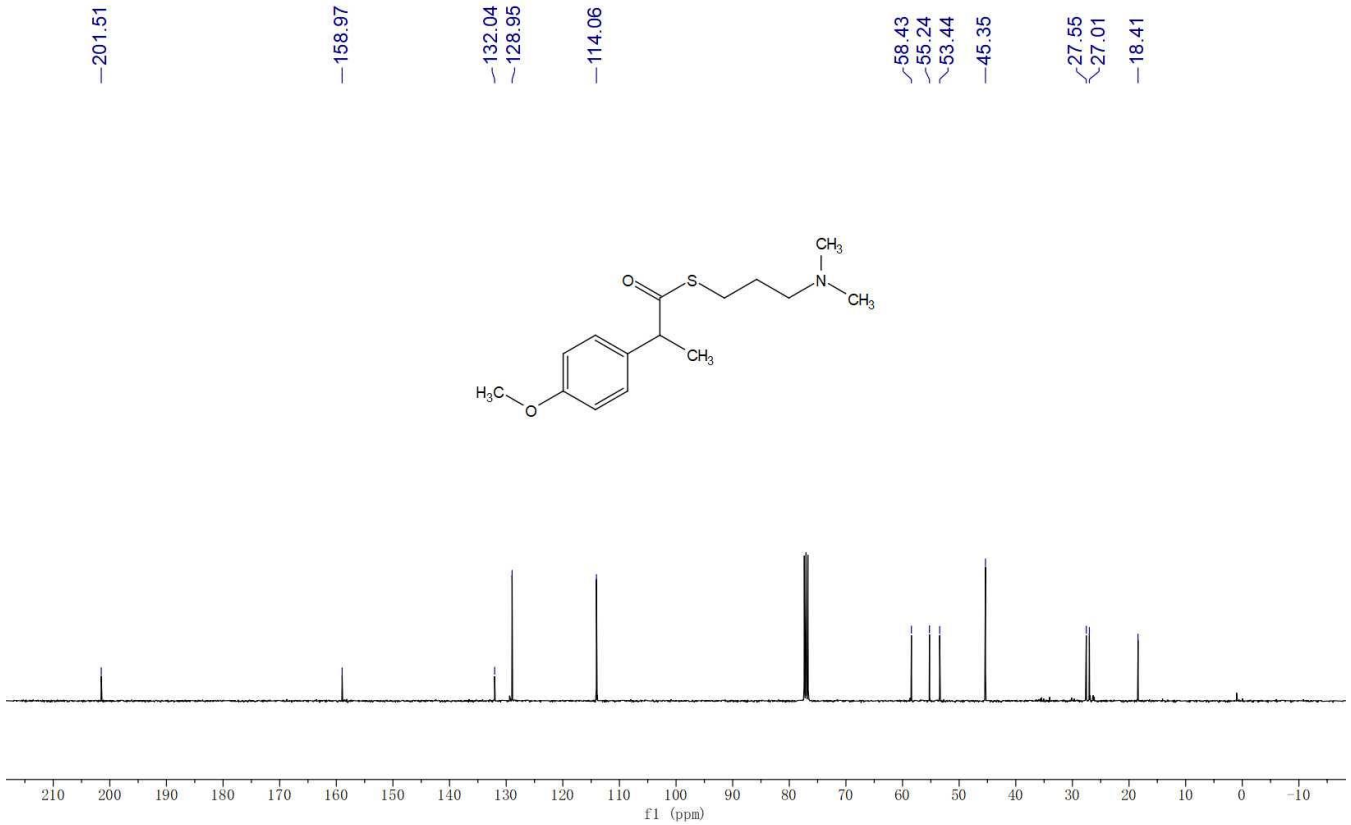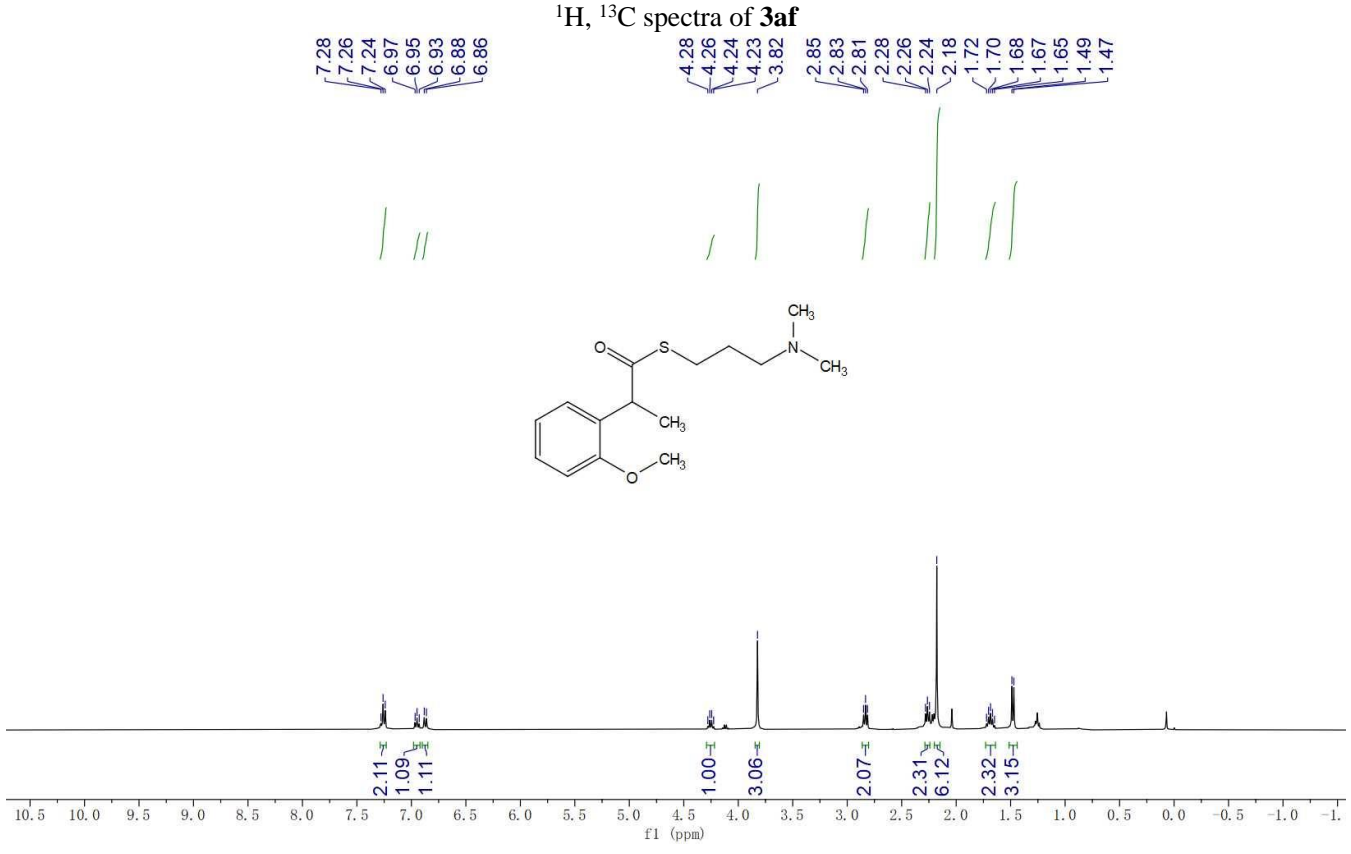

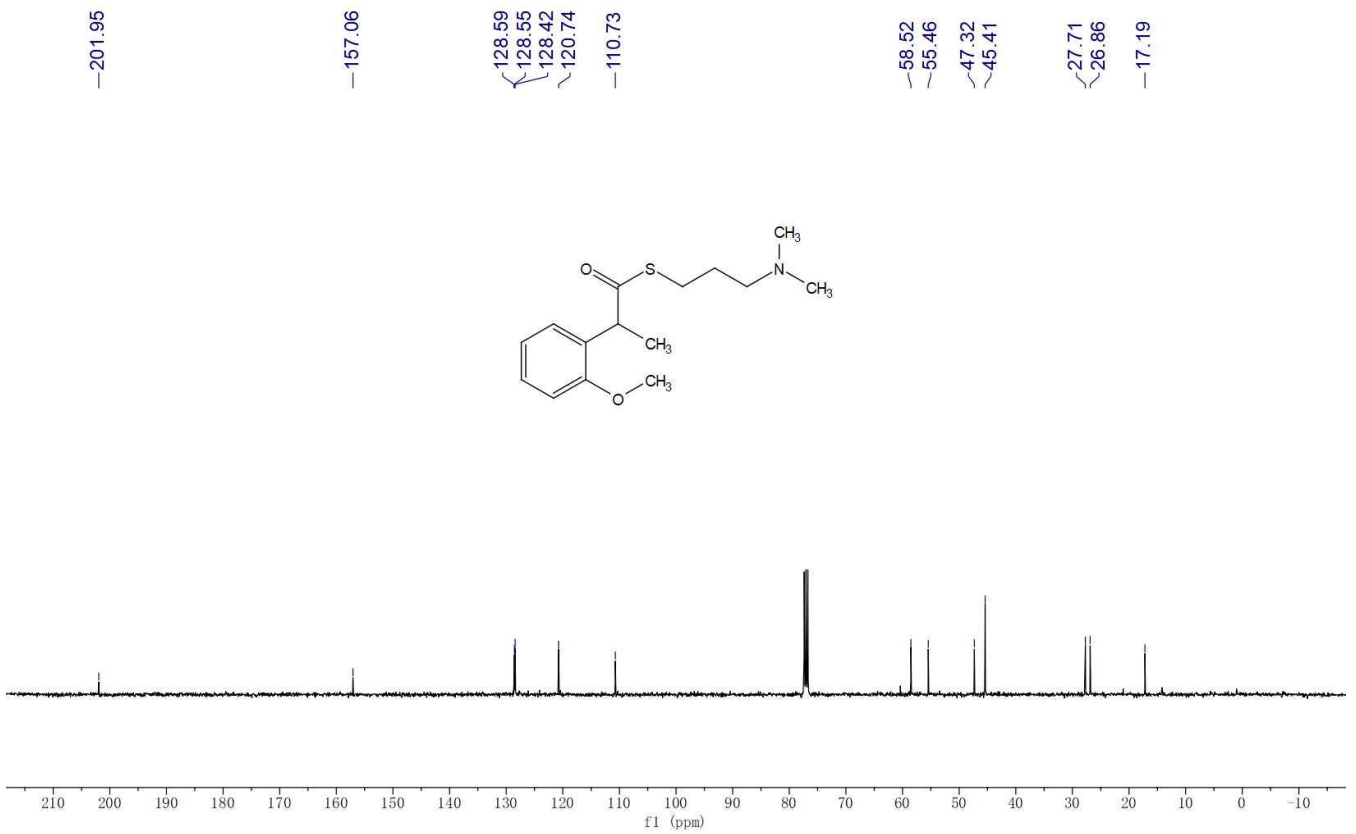

<sup>1</sup>H, <sup>13</sup>C spectra of 3ag

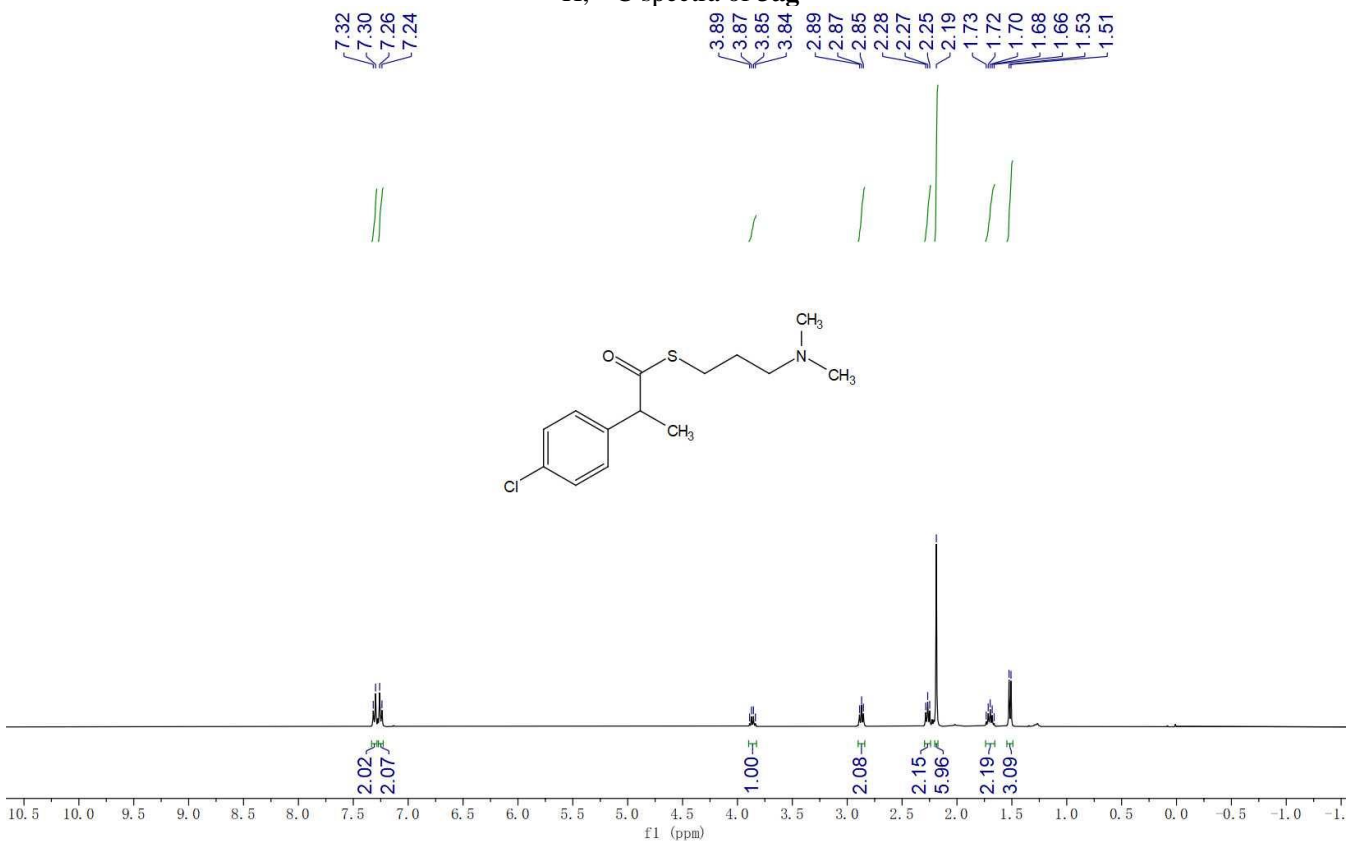

—200.71

—138.41  
—133.33  
—129.24  
—128.81

—58.39  
—53.58  
—45.40

—27.52  
—27.09  
—18.42

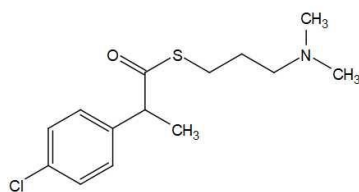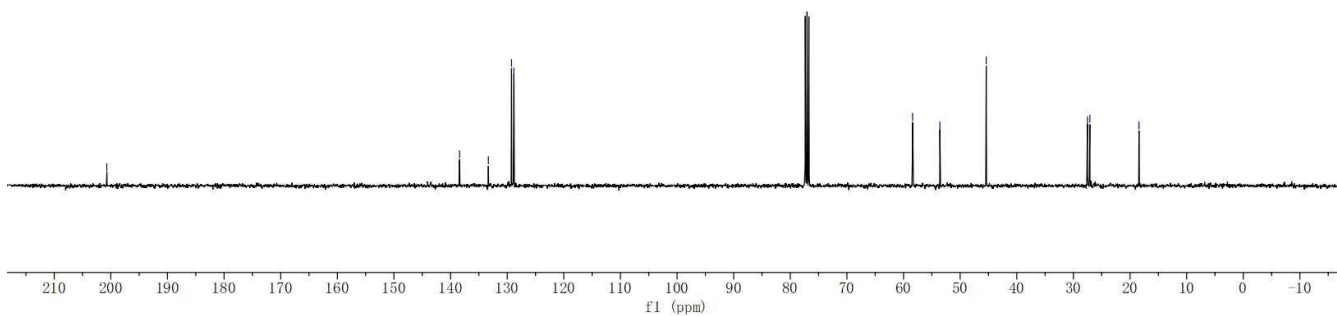

<sup>1</sup>H, <sup>13</sup>C spectra of 3ah

7.19  
7.16  
6.72  
6.69

3.81  
3.79  
3.77  
3.76  
2.94  
2.85  
2.84  
2.83  
2.82  
2.81  
2.80  
2.78  
1.51  
1.49  
1.47  
1.36  
1.35  
1.34  
1.32  
0.91  
0.89  
0.87

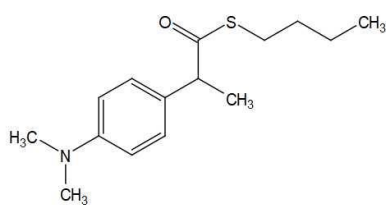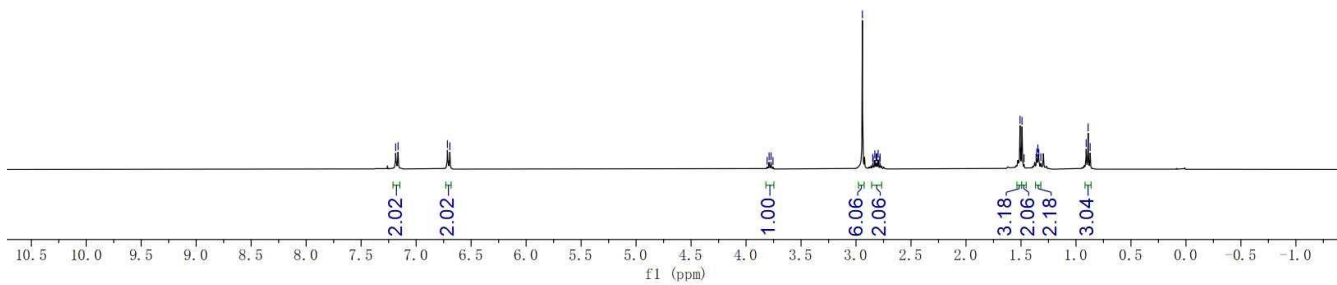

-202.16

-149.94

-128.64  
-127.67

-112.62

-53.38

-40.55

-31.55

-28.77

-22.01

-18.35

-13.58

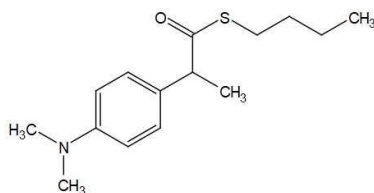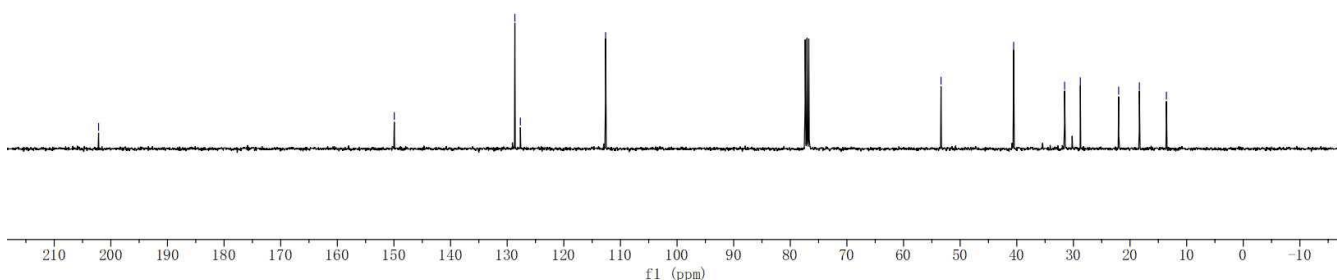

<sup>1</sup>H and <sup>13</sup>C NMR spectra of 3ai

7.39  
7.37  
7.28  
7.26  
7.24  
7.22  
7.20  
4.25  
4.24  
4.23  
4.22  
3.19  
3.17  
3.15  
3.13  
3.11  
2.98  
2.97  
2.94  
2.92  
2.90  
2.88  
2.50  
2.48  
2.48  
2.47  
2.46  
2.45  
2.44  
2.44  
2.43  
2.43  
2.42  
2.41  
2.40  
2.39  
2.39  
2.38  
2.38  
2.37  
2.36  
2.36  
2.34  
1.59  
1.57  
1.55  
1.55  
1.53  
1.42  
1.40  
1.39  
1.37  
1.37  
1.35  
0.94  
0.92  
0.90

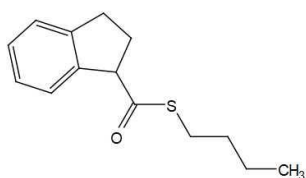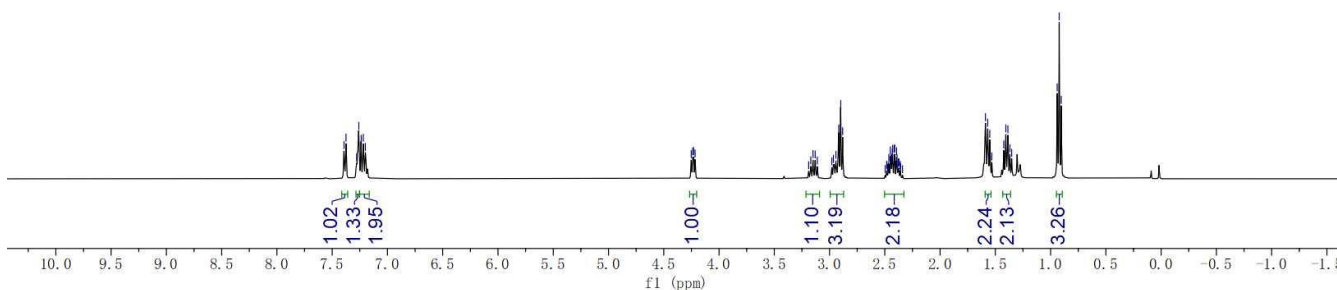

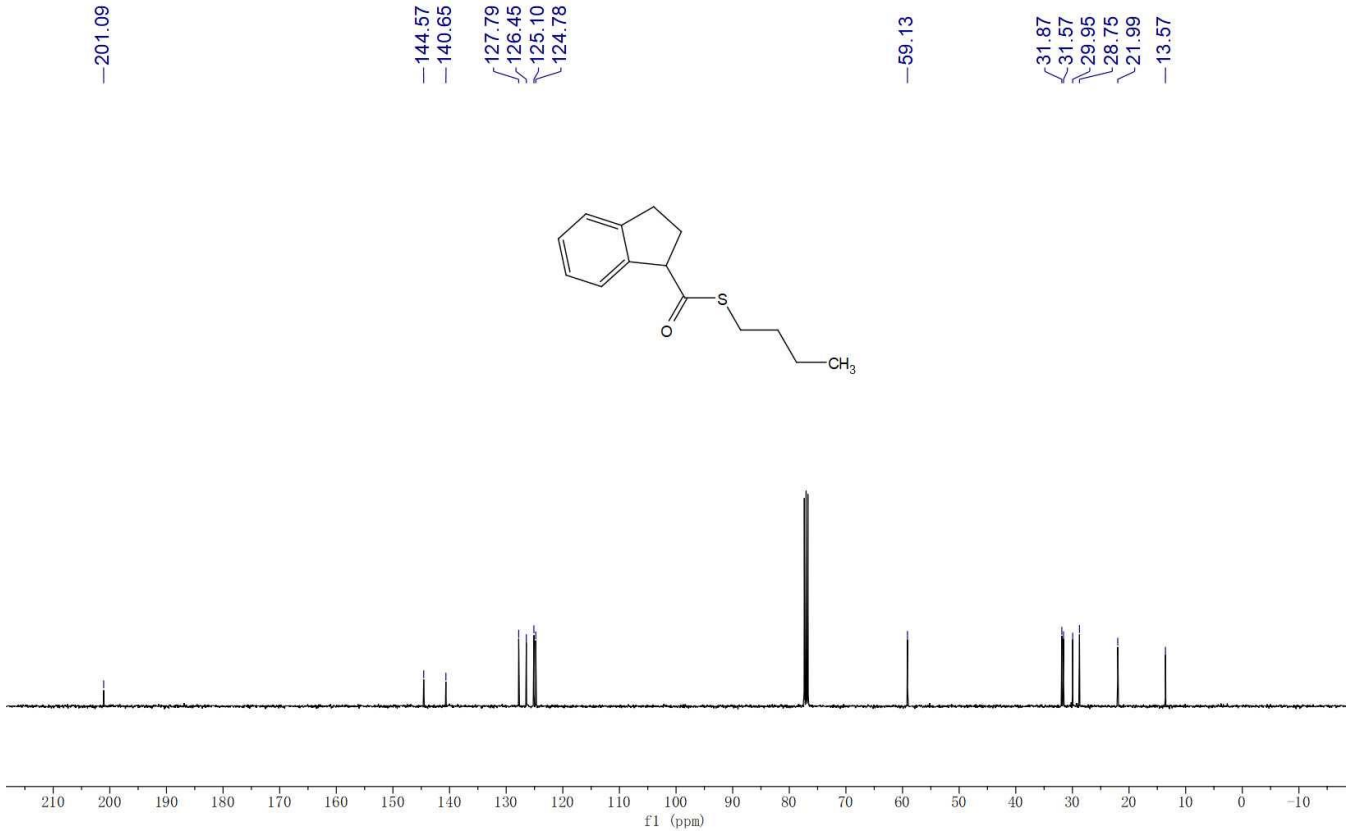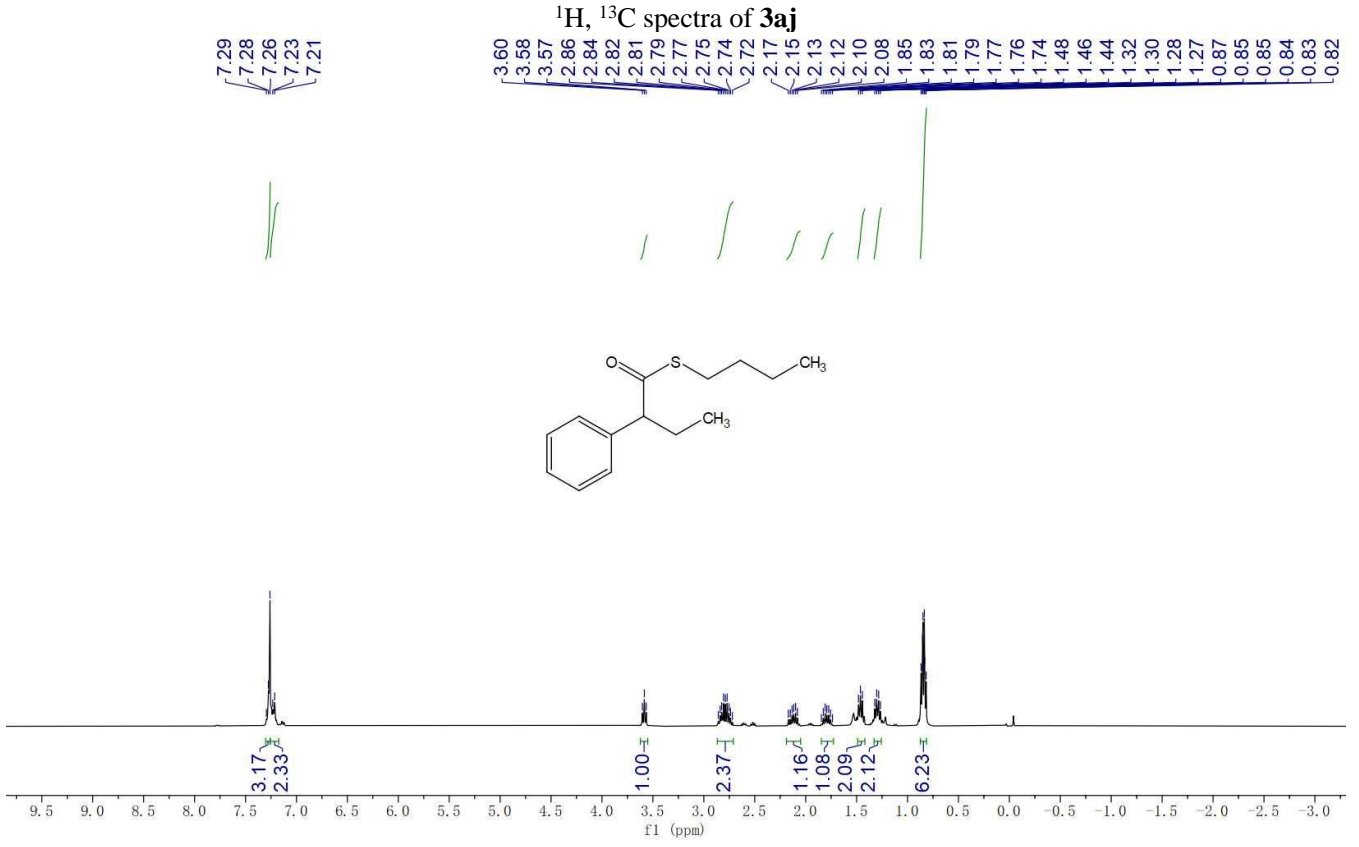

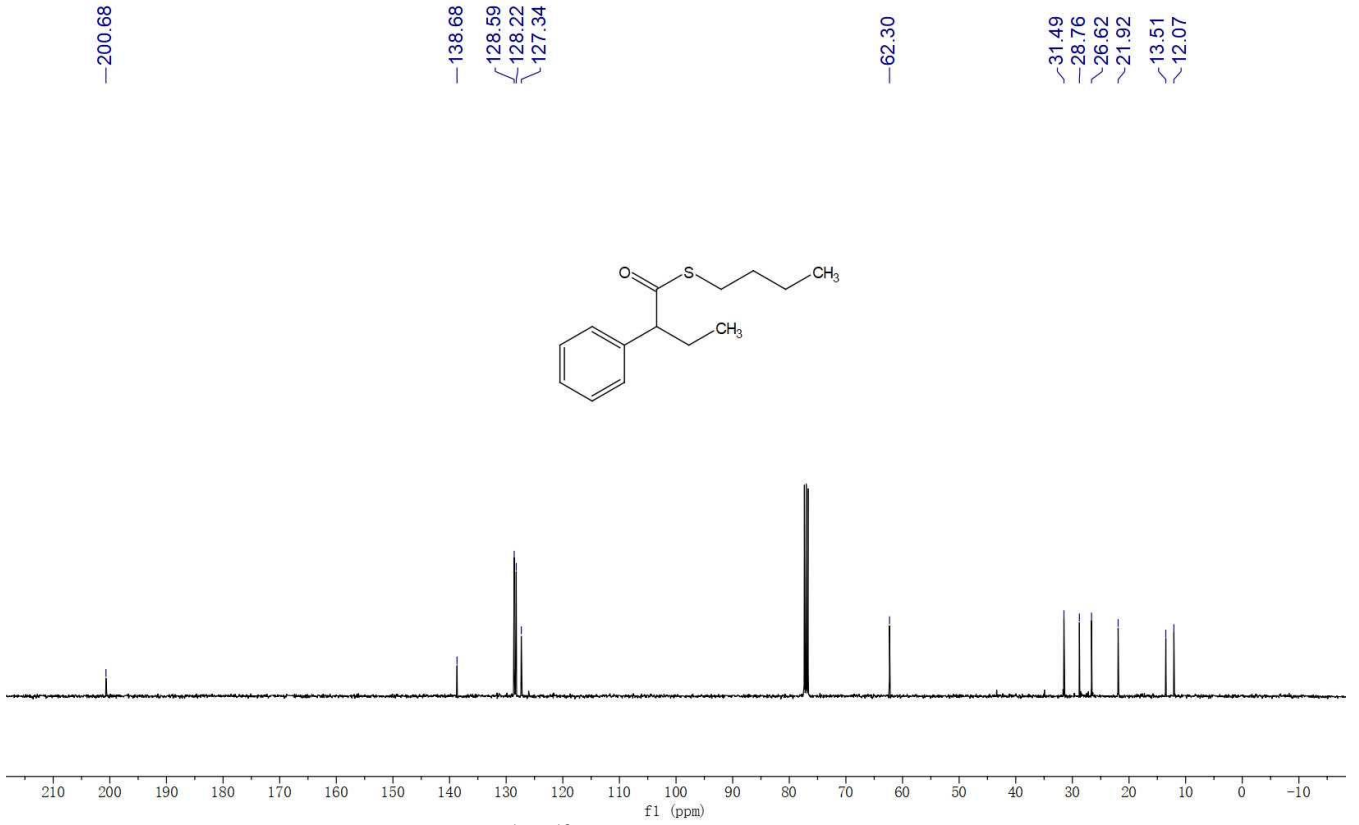

<sup>1</sup>H, <sup>13</sup>C spectra of 3ak and 3u

- Chemical shift values (ppm) for 3ak and 3u:
- 3.79, 3.59, 3.57, 3.55, 2.89, 2.87, 2.86, 2.84, 2.82, 2.80, 2.79, 2.77, 2.75, 2.18, 2.16, 2.15, 2.13, 2.11, 2.09, 2.07, 1.85, 1.83, 1.81, 1.79, 1.78, 1.76, 1.54, 1.52, 1.50, 1.48, 1.46, 1.38, 1.36, 1.35, 1.33, 1.31, 0.90, 0.88, 0.86
  - 7.23, 7.20, 6.87, 6.85
  - 200.68, 138.68, 128.59, 128.22, 127.34, 62.30, 31.49, 28.76, 26.62, 21.92, 13.51, 12.07

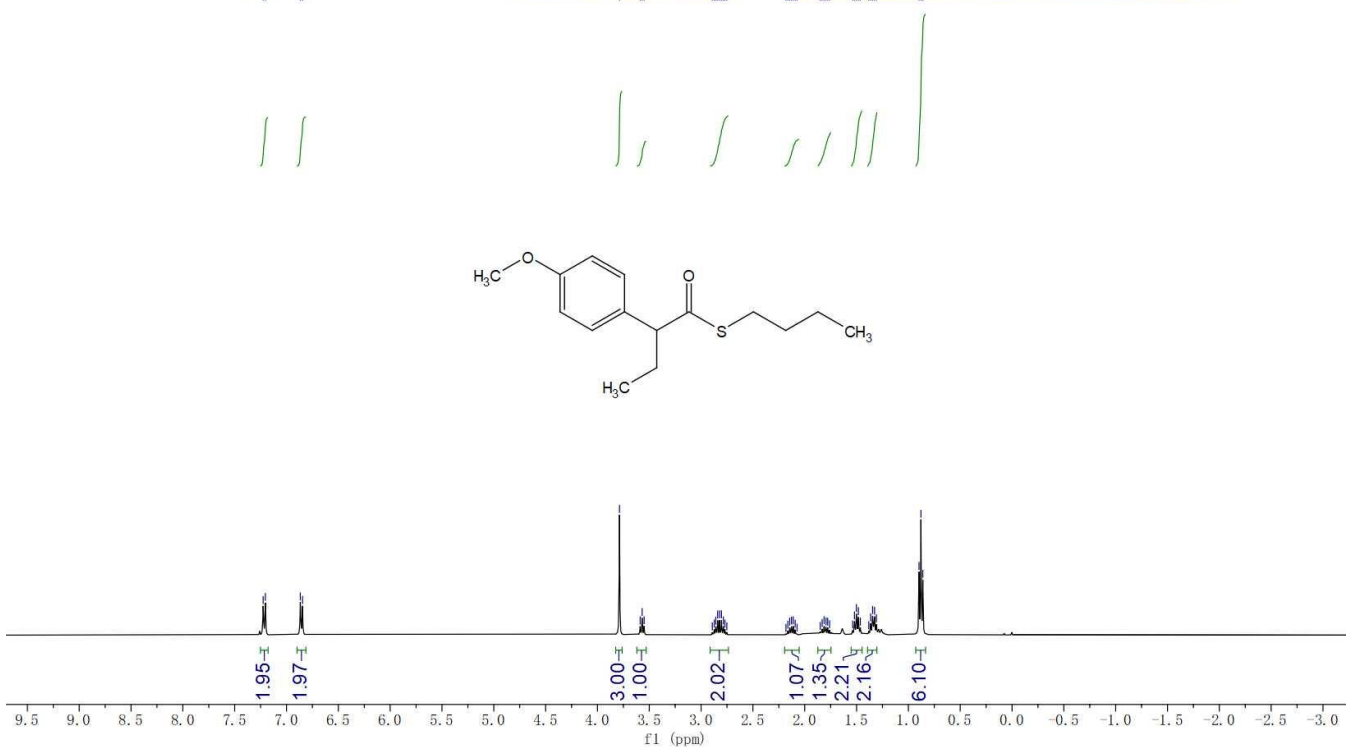



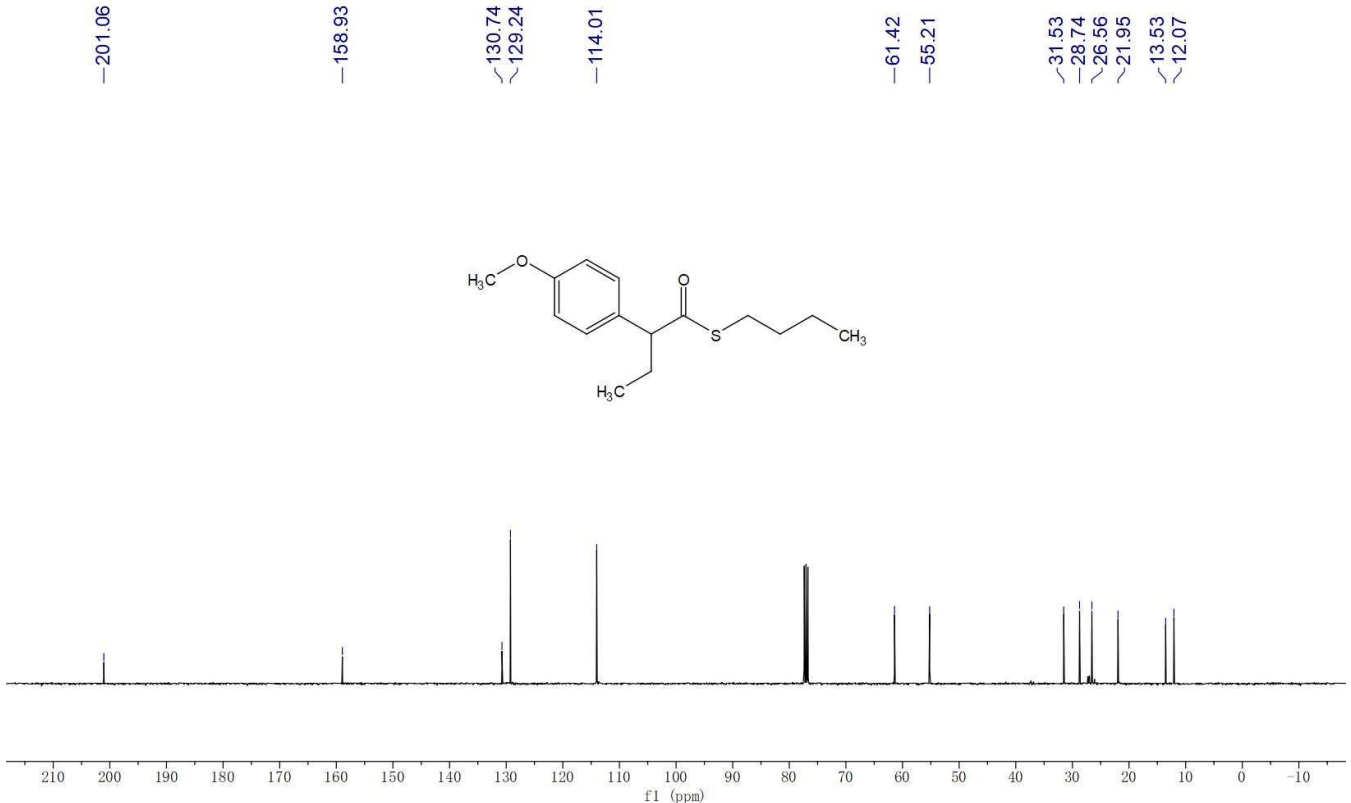

<sup>1</sup>H, <sup>13</sup>C spectra of 3a

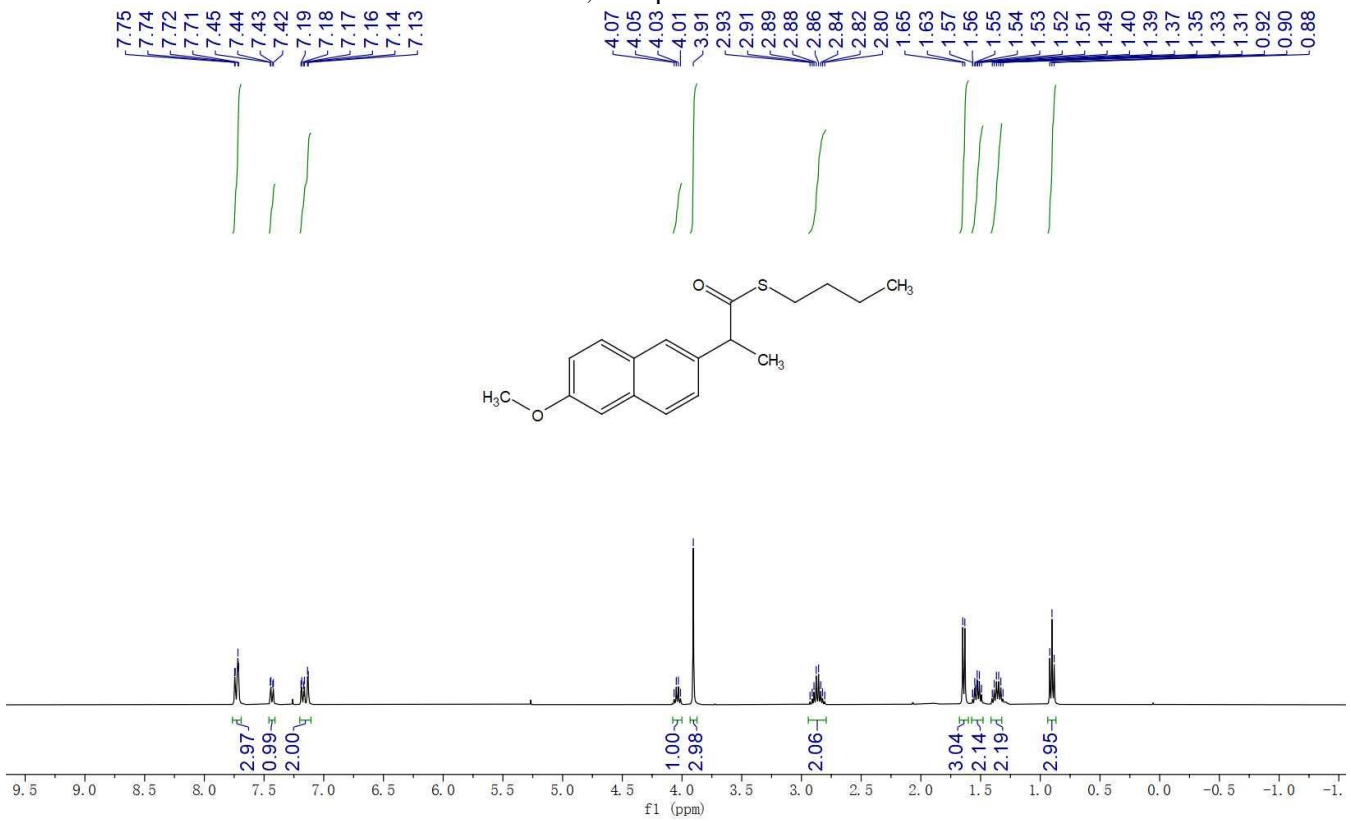

-201.43

-157.82

135.23  
133.94  
129.40  
129.02  
127.23  
126.64  
126.48  
119.06  
-105.71

55.29  
54.28

31.54  
28.86  
22.00  
18.52  
13.58

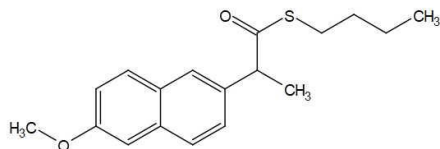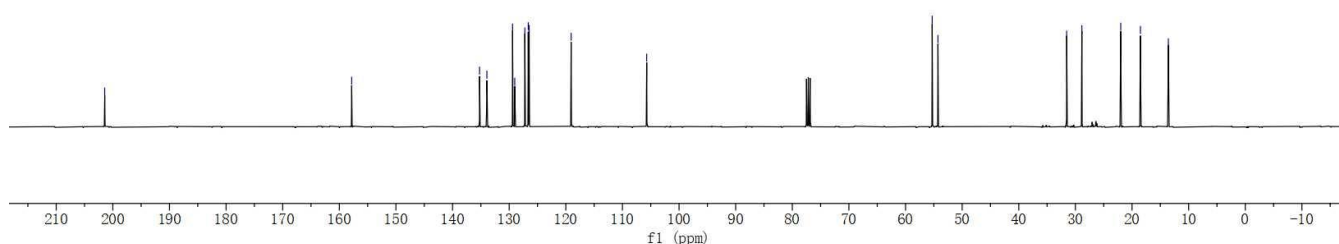

<sup>1</sup>H, <sup>13</sup>C spectra of 3am

-12.29

7.79  
7.76  
7.74  
7.69  
7.40  
7.39  
7.38  
7.37  
7.27  
7.26  
7.14  
7.14  
7.12  
7.11

3.84  
3.81  
3.79  
3.77  
3.75

1.43  
1.41

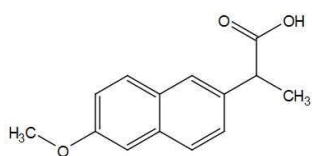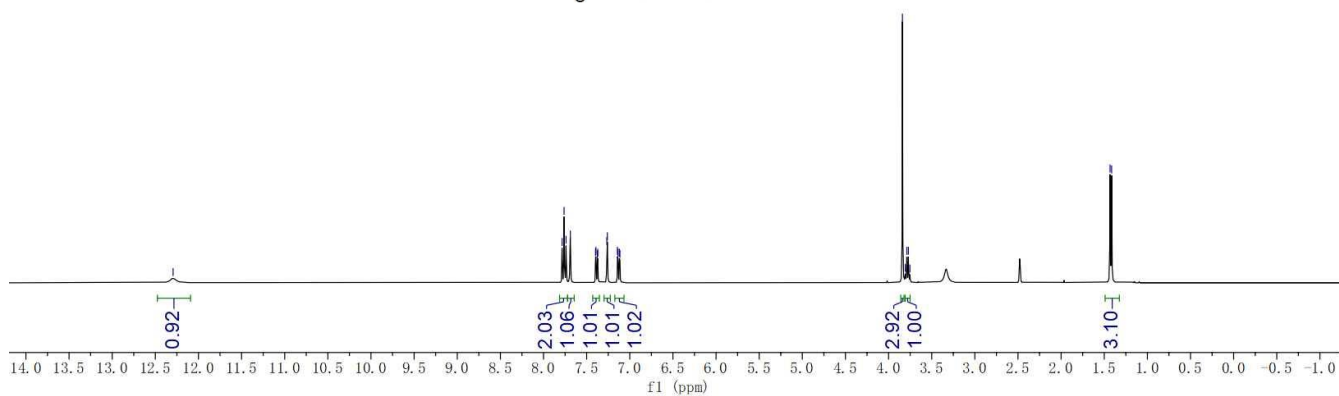

0.92

2.03  
1.06  
1.01  
1.01  
1.02

2.92  
1.00

3.10

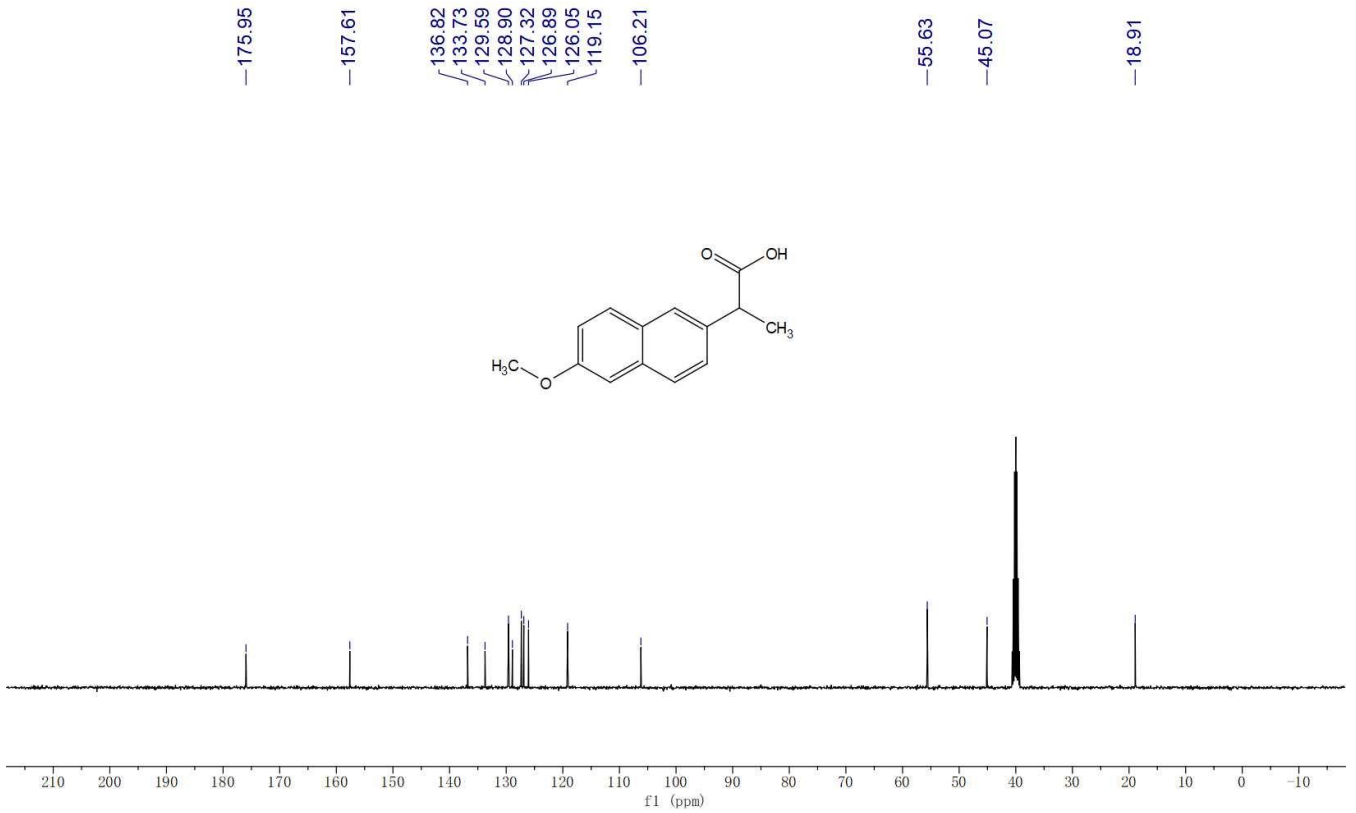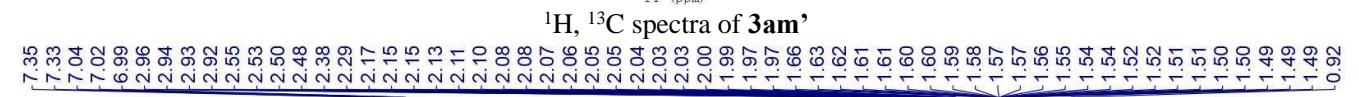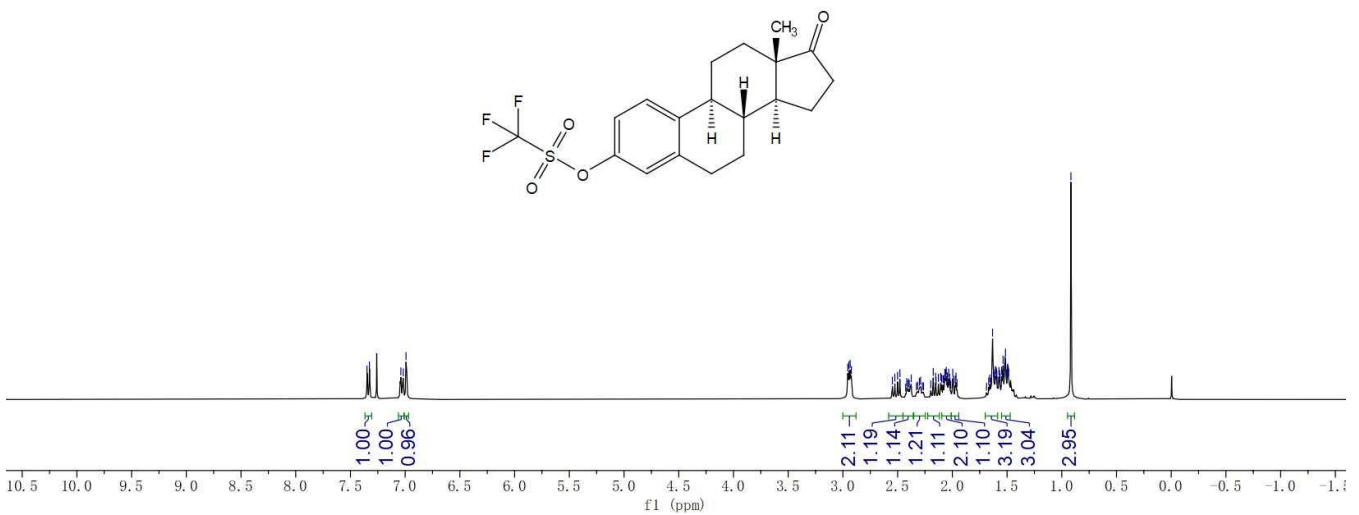

—220.34

—147.62  
—140.30  
—139.32  
—127.19  
—121.24  
—118.31

50.42  
47.85  
44.11  
37.78  
35.79  
31.50  
29.38  
26.09  
25.69  
21.57  
13.79

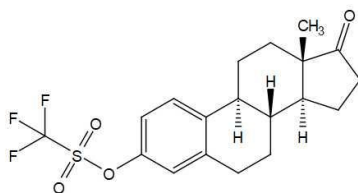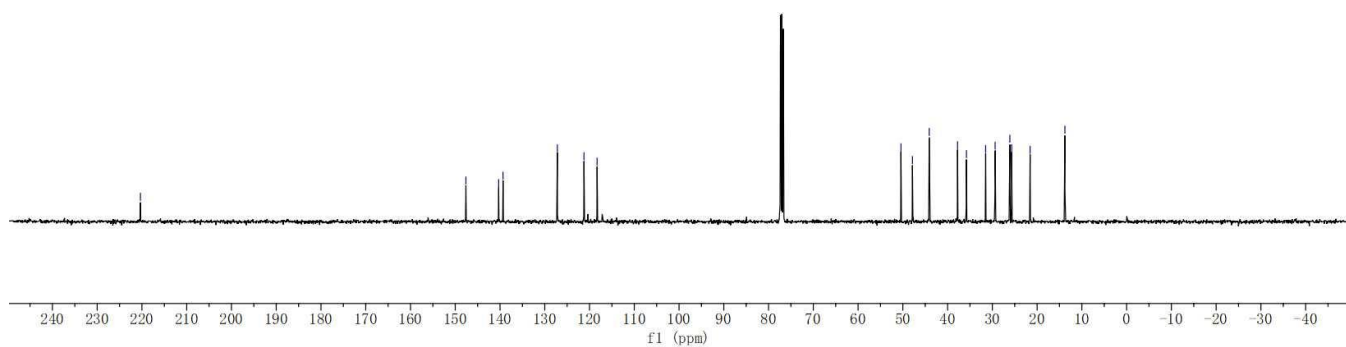

<sup>1</sup>H, <sup>13</sup>C spectra of 1S

7.27  
7.25  
7.22  
7.20  
7.14  
6.70  
6.67  
6.66  
6.63  
5.72  
5.68  
5.20  
5.18  
2.93  
2.92  
2.90  
2.54  
2.52  
2.49  
2.47  
2.44  
2.41  
2.40  
2.29  
2.17  
2.14  
2.12  
2.10  
2.09  
2.08  
2.06  
2.05  
2.04  
2.03  
2.01  
2.00  
1.98  
1.96  
1.95  
1.95  
1.65  
1.63  
1.62  
1.61  
1.60  
1.59  
1.57  
1.56  
1.55  
1.54  
1.53  
1.52  
1.51  
1.50  
1.49  
1.48  
1.47  
1.45  
0.91

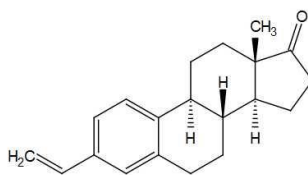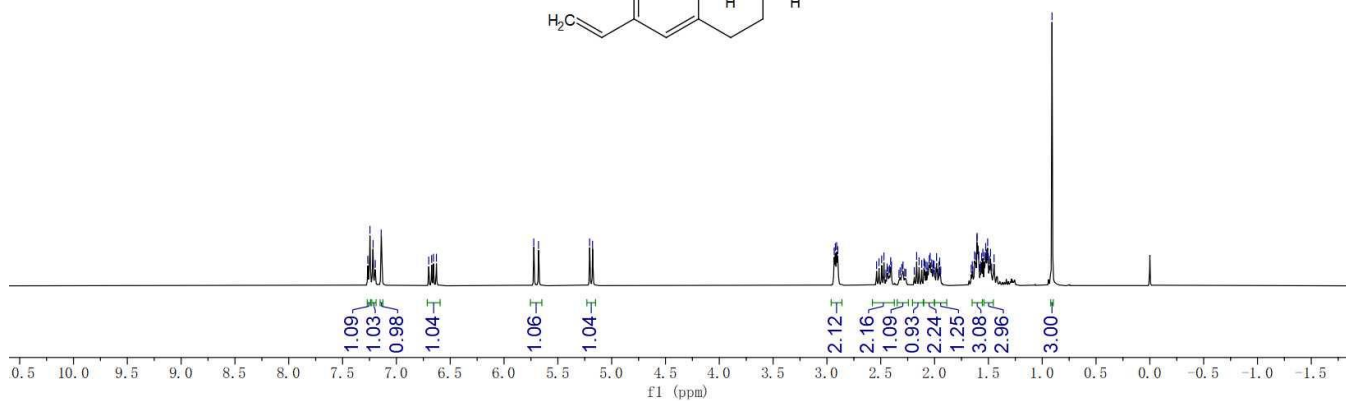

-220.77

139.55  
136.61  
136.58  
135.25  
126.88  
125.54  
123.62  
113.17

50.56  
47.99  
44.47  
38.20  
35.86  
31.62  
29.39  
26.51  
25.73  
21.60  
13.85

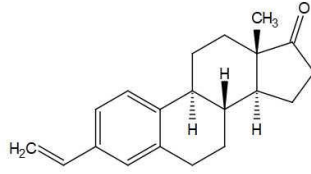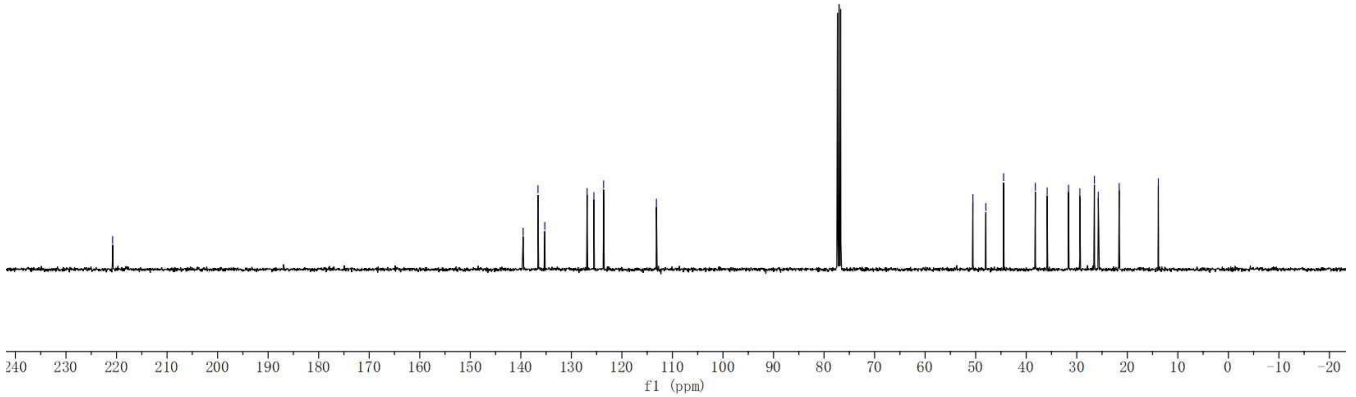

<sup>1</sup>H, <sup>13</sup>C spectra of 1an

7.26  
7.24  
7.10  
7.08  
7.04  
3.84  
3.82  
2.93  
2.92  
2.91  
2.90  
2.89  
2.87  
2.85  
2.83  
2.81  
2.79  
2.49  
2.47  
2.16  
2.14  
2.09  
2.08  
2.06  
2.05  
2.05  
2.04  
2.03  
2.01  
1.98  
1.95  
1.65  
1.63  
1.62  
1.60  
1.59  
1.58  
1.57  
1.56  
1.56  
1.55  
1.54  
1.54  
1.52  
1.50  
1.49  
1.48  
1.47  
1.45  
1.44  
1.38  
1.37  
1.36  
1.35  
1.34  
1.34  
1.33  
1.26  
0.91  
0.90  
0.89  
0.88

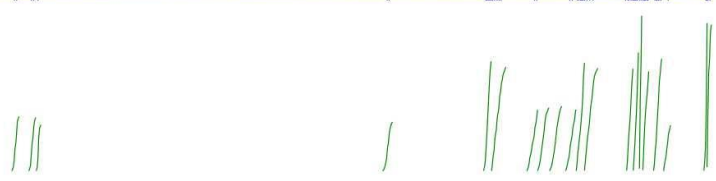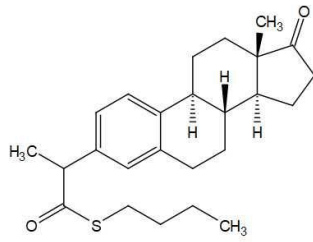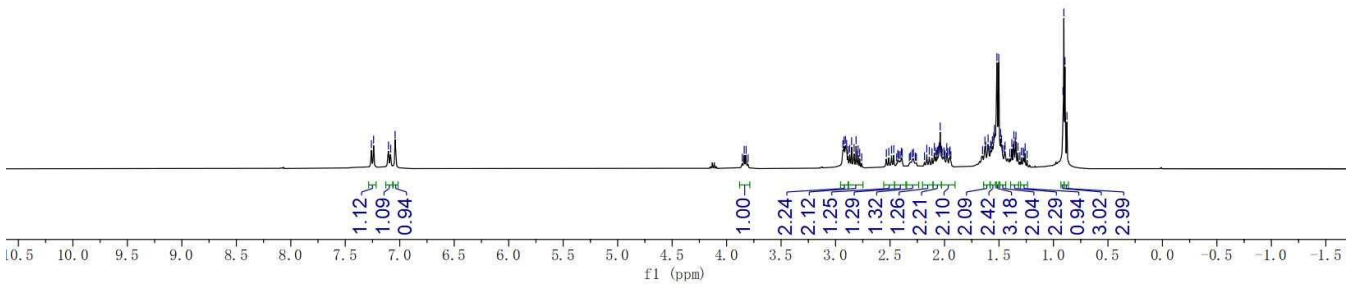

-220.61

-201.28

138.88  
137.47  
136.75  
128.27  
125.63  
125.18

53.84  
50.57  
47.96  
44.36  
38.11  
35.84  
31.65  
31.52  
29.41  
28.79  
26.53  
25.66  
21.99  
21.61  
18.58  
13.86  
13.59

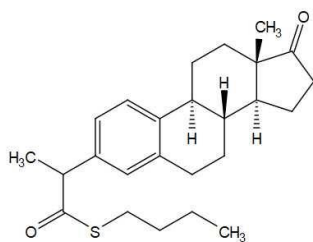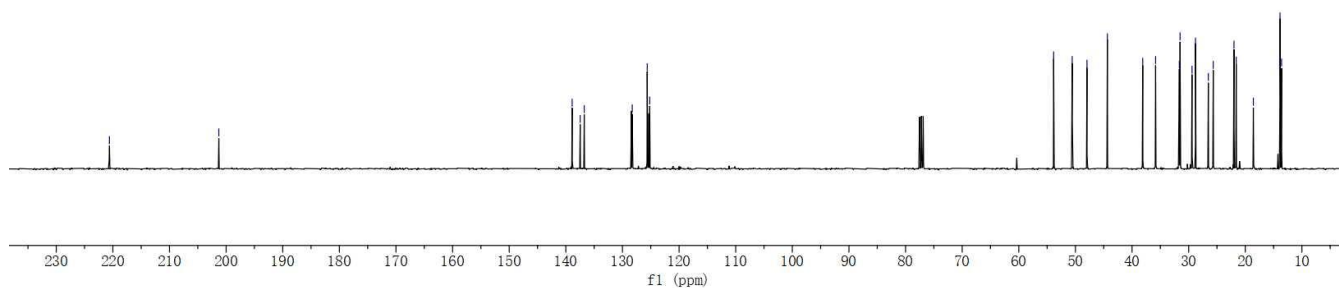

<sup>1</sup>H, <sup>13</sup>C spectra of 3an

## 14. Chiral HPLC chromatogram

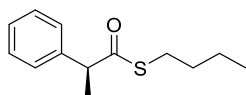

### *S*-butyl (*S*)-2-phenylpropanethioate (3aaa)<sup>16</sup>

Yellow liquid; Yield = 38%, b/l > 99/1, ee = 46%, HPLC analysis: Daicel Chiralpak OJ-H, *n*-hexane/*i*-propanol = 500:1, flow rate = 1.0 mL/min,  $\lambda$  = 254 nm, retention time: 11.67 min (major) and 13.56 (minor).  $[\alpha]_D^{20}$  = +30.0 (*c* = 0.50, CHCl<sub>3</sub>).

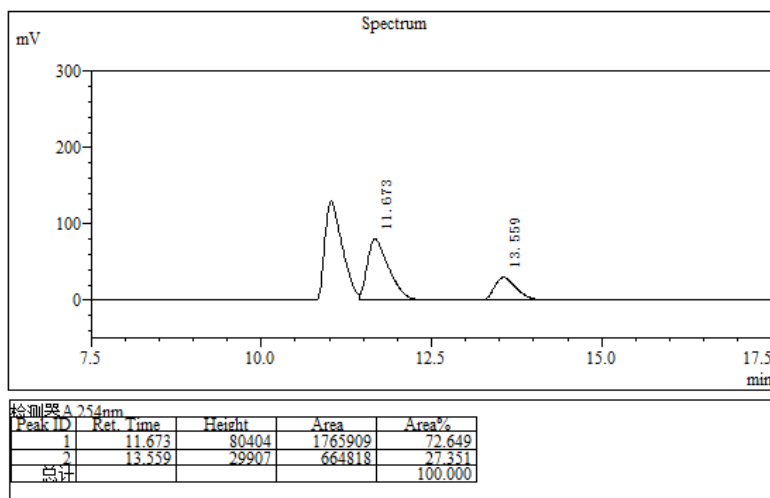

Supplement: d3qo01940c1.pdf [file d3qo01940c1.pdf]
